# Supplementary material for: Diagnostic and prognostic factors in patients with prostate cancer: a systematic review
Source: PubMed Central journal article supplement — BMJ Open. 2022 Apr 3;12(4):e058267. doi: 10.1136/bmjopen-2021-058267 (PMC8981333; doi:10.1136/bmjopen-2021-058267), 2022-04-03
Supplement: bmjopen-2021-058267.draft_revisions.pdf [file bmjopen-2021-058267.draft_revisions.pdf]

# BMJ Open

BMJ Open is committed to open peer review. As part of this commitment we make the peer review history of every article we publish publicly available.

When an article is published we post the peer reviewers' comments and the authors' responses online. We also post the versions of the paper that were used during peer review. These are the versions that the peer review comments apply to.

The versions of the paper that follow are the versions that were submitted during the peer review process. They are not the versions of record or the final published versions. They should not be cited or distributed as the published version of this manuscript.

BMJ Open is an open access journal and the full, final, typeset and author-corrected version of record of the manuscript is available on our site with no access controls, subscription charges or pay-per-view fees (<http://bmjopen.bmj.com>).

If you have any questions on BMJ Open's open peer review process please email [info.bmjopen@bmj.com](mailto:info.bmjopen@bmj.com)

# BMJ Open

## Diagnostic and prognostic factors in patients with prostate cancer: a scoping review

|                               |                                                                                                                                                                                                                                                                                                                                                                                                                                                                                                                                                                                                                                                                                                                                                                                                                                                                                                                                                                                                                                                                                                                                                                                                                                                                                                                                                                                                                                                                                                                                                                                                                                                                                                                                                                                                                                                                                                                                                                                                                                                                                                                        |
|-------------------------------|------------------------------------------------------------------------------------------------------------------------------------------------------------------------------------------------------------------------------------------------------------------------------------------------------------------------------------------------------------------------------------------------------------------------------------------------------------------------------------------------------------------------------------------------------------------------------------------------------------------------------------------------------------------------------------------------------------------------------------------------------------------------------------------------------------------------------------------------------------------------------------------------------------------------------------------------------------------------------------------------------------------------------------------------------------------------------------------------------------------------------------------------------------------------------------------------------------------------------------------------------------------------------------------------------------------------------------------------------------------------------------------------------------------------------------------------------------------------------------------------------------------------------------------------------------------------------------------------------------------------------------------------------------------------------------------------------------------------------------------------------------------------------------------------------------------------------------------------------------------------------------------------------------------------------------------------------------------------------------------------------------------------------------------------------------------------------------------------------------------------|
| Journal:                      | <i>BMJ Open</i>                                                                                                                                                                                                                                                                                                                                                                                                                                                                                                                                                                                                                                                                                                                                                                                                                                                                                                                                                                                                                                                                                                                                                                                                                                                                                                                                                                                                                                                                                                                                                                                                                                                                                                                                                                                                                                                                                                                                                                                                                                                                                                        |
| Manuscript ID                 | bmjopen-2021-058267                                                                                                                                                                                                                                                                                                                                                                                                                                                                                                                                                                                                                                                                                                                                                                                                                                                                                                                                                                                                                                                                                                                                                                                                                                                                                                                                                                                                                                                                                                                                                                                                                                                                                                                                                                                                                                                                                                                                                                                                                                                                                                    |
| Article Type:                 | Original research                                                                                                                                                                                                                                                                                                                                                                                                                                                                                                                                                                                                                                                                                                                                                                                                                                                                                                                                                                                                                                                                                                                                                                                                                                                                                                                                                                                                                                                                                                                                                                                                                                                                                                                                                                                                                                                                                                                                                                                                                                                                                                      |
| Date Submitted by the Author: | 13-Oct-2021                                                                                                                                                                                                                                                                                                                                                                                                                                                                                                                                                                                                                                                                                                                                                                                                                                                                                                                                                                                                                                                                                                                                                                                                                                                                                                                                                                                                                                                                                                                                                                                                                                                                                                                                                                                                                                                                                                                                                                                                                                                                                                            |
| Complete List of Authors:     | <p>Beyer, Katharina; King's College London, Translational and Oncology Research (TOUR)</p> <p>Moris, Lisa; KU Leuven University Hospitals Leuven, Department of Urology</p> <p>Lardas, Michael; Metropolitan Hospital Athens, Department of Urology</p> <p>Haire, Anna ; King's College London, TOUR</p> <p>Barletta, Francesco; IRCCS Ospedale San Raffaele, Unit of Urology/Division of Oncology, URI</p> <p>Scuderi, Simone; IRCCS Ospedale San Raffaele, Unit of Urology/Division of Oncology, URI</p> <p>Molnar, Megan; Bayer AG</p> <p>Herrera, Ronald; Bayer AG</p> <p>Rauf, Abdul; Mid Cheshire Hospitals NHS Foundation Trust, Department of Urology</p> <p>Campi, Riccardo; Universita degli Studi di Firenze</p> <p>Greco, Isabella; University of Florence, Department of Minimally Invasive and Robotic Urologic Surgery and Kidney Transplantation</p> <p>Shiranov, Kirill; CDC "Zdorovie "</p> <p>Dabestani, Saeed; Lund University, Dept. of Translational Medicine</p> <p>van den Broeck, Thomas; University hospital leuven, Department of Urology</p> <p>Arun, Sujenthiran; St George's NHS Foundation Trust, Department of Urology</p> <p>Gacci, Mauro; University of Florence, Department of Minimally Invasive and Robotic Urologic Surgery and Kidney Transplantation</p> <p>Gandaglia, Giorgio; IRCCS Ospedale San Raffaele, Unit of Urology/Division of Oncology</p> <p>Omar, Muhammad; University of Aberdeen, Academic Urology Unit/ Cochrane Incontinence Group</p> <p>MacLennan, Steven; University of Aberdeen</p> <p>Roobol, Monique J.; Erasmus University Medical Center, Department of Urology</p> <p>Farahmand, Bahman; Bayer AG</p> <p>Vradi, Eleni; Bayer AG, Department of Epidemiology</p> <p>Devecseri, Zsuzsanna; Sanofi SA</p> <p>Asiimwe, Alex; Bayer Pharma AG, Medical Affairs and PV</p> <p>Zong, Jihong; Bayer U.S. , Epidemiology</p> <p>MacLennan, Sara; University of Aberdeen, Academic Urology Unit</p> <p>Collette, Laurence; EORTC Headquarters</p> <p>NDow, James; University of Aberdeen, Surgery</p> <p>Briganti , A; Vita-Salute University San Raffaele</p> |

1  
2  
3  
4  
5  
6  
7  
8  
9  
10  
11  
12  
13  
14  
15  
16  
17  
18  
19  
20  
21  
22  
23  
24  
25  
26  
27  
28  
29  
30  
31  
32  
33  
34  
35  
36  
37  
38  
39  
40  
41  
42  
43  
44  
45  
46  
47  
48  
49  
50  
51  
52  
53  
54  
55  
56  
57  
58  
59  
60

|           |                                                                                                                                            |
|-----------|--------------------------------------------------------------------------------------------------------------------------------------------|
|           | Bjartell, Anders; Skåne University Hospital<br>Van Hemelrijck, Mieke; King's College London, Translational and<br>Oncology Research (TOUR) |
| Keywords: | Prostate disease < UROLOGY, Urological tumours < ONCOLOGY,<br>Epidemiology < ONCOLOGY                                                      |
|           |                                                                                                                                            |

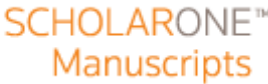

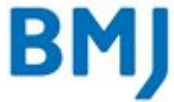

I, the Submitting Author has the right to grant and does grant on behalf of all authors of the Work (as defined in the below author licence), an exclusive licence and/or a non-exclusive licence for contributions from authors who are: i) UK Crown employees; ii) where BMJ has agreed a CC-BY licence shall apply, and/or iii) in accordance with the terms applicable for US Federal Government officers or employees acting as part of their official duties; on a worldwide, perpetual, irrevocable, royalty-free basis to BMJ Publishing Group Ltd ("BMJ") its licensees and where the relevant Journal is co-owned by BMJ to the co-owners of the Journal, to publish the Work in this journal and any other BMJ products and to exploit all rights, as set out in our [licence](#).

The Submitting Author accepts and understands that any supply made under these terms is made by BMJ to the Submitting Author unless you are acting as an employee on behalf of your employer or a postgraduate student of an affiliated institution which is paying any applicable article publishing charge ("APC") for Open Access articles. Where the Submitting Author wishes to make the Work available on an Open Access basis (and intends to pay the relevant APC), the terms of reuse of such Open Access shall be governed by a Creative Commons licence – details of these licences and which [Creative Commons](#) licence will apply to this Work are set out in our licence referred to above.

Other than as permitted in any relevant BMJ Author's Self Archiving Policies, I confirm this Work has not been accepted for publication elsewhere, is not being considered for publication elsewhere and does not duplicate material already published. I confirm all authors consent to publication of this Work and authorise the granting of this licence.

## Diagnostic and prognostic factors in patients with prostate cancer: a scoping review

### Author list:

Katharina Beyer<sup>a\*</sup>; Lisa Moris<sup>b\*</sup>; Michael Lardas<sup>c\*</sup>; Anna Haire<sup>a</sup>; Francesco Barletta<sup>d</sup>; Simone Scuderi<sup>d</sup>; Megan Molnar<sup>e</sup>; Ronald Herrera<sup>e</sup>; Abdul Rauff; Riccardo Campi<sup>g</sup>; Isabella Greco<sup>g</sup>; Kirill Shiranov<sup>h</sup>; Saeed Dabestani<sup>i</sup>; Thomas van den Broeck<sup>b</sup>; Sujenthiran Arun<sup>j</sup>; Mauro Gacci<sup>g</sup>; Giorgio Gandaglia<sup>d</sup>; Muhammad Imran Omar<sup>k</sup>; Steven MacLennan<sup>k</sup>; Monique J. Roobol<sup>l</sup>; Bahman Farahmand<sup>m</sup>; Eleni Vradi<sup>e</sup>; Zsuzsanna Devecseri<sup>n</sup>; Alex Asimwe<sup>e</sup>; Jihong Zong<sup>o</sup>; Sara J MacLennan<sup>k</sup>; Laurence Collette<sup>p</sup>; James N'Dow<sup>l</sup>; Alberto Briganti<sup>d, q</sup>; Anders Bjartell<sup>r</sup>; Mieke Van Hemelrijck<sup>a\*</sup> and the PIONEER Consortium

\*Authors share first authorship

### Corresponding author:

Katharina Beyer,  
Translational Oncology and Urology Research (TOUR),  
School of Cancer and Pharmaceutical Studies,  
3rd Floor, Bermondsey Wing, Guy's Hospital, Great Maze  
Pond,  
London SE1 9RT,  
02071885594  
[katharina.beyer@kcl.ac.uk](mailto:katharina.beyer@kcl.ac.uk)

### Affiliations:

<sup>a</sup> Translational and Oncology Research (TOUR), King's College London, Faculty of Life Sciences and Medicine, London, UK

<sup>b</sup> Department of Urology, University Hospitals Leuven, Leuven, Belgium

<sup>c</sup> Department of Urology, Metropolitan general, Athens, Greece

<sup>d</sup> Unit of Urology/Division of Oncology, URI, IRCCS Ospedale San Raffaele, Milan, Italy

<sup>e</sup> Department of Epidemiology, Bayer AG, Berlin, Germany

<sup>f</sup> Department of Urology, Mid Cheshire Hospitals, NHS Foundation Trust, Crewe CW1 4QJ, United Kingdom

<sup>g</sup> Department of Minimally Invasive and Robotic Urologic Surgery and Kidney Transplantation, University of Florence, Florence, Italy

<sup>h</sup> CDC "Zdorovie ", Rostov-on-Don, Russia

<sup>i</sup> Dept. of Translational Medicine, Division of Urological Cancers, Lund University, Kristianstad Central Hospital, Malmo, Sweden.

<sup>j</sup> Department of Urology, St George's NHS Foundation Trust, London

<sup>k</sup> Academic Urology Unit, University of Aberdeen, Aberdeen, UK

<sup>l</sup> Department of Urology, Erasmus University Medical Center, Rotterdam, The Netherlands.

<sup>m</sup> Global Epidemiology, Bayer AB, Stockholm, Sweden

<sup>n</sup> Sanofi, France

<sup>o</sup> Global Medical Affairs Oncology, Real World Evidence, Bayer HealthCare Pharmaceuticals Inc., Whippany, New Jersey, USA

<sup>p</sup> EORTC Headquarters, Brussels, Belgium

<sup>q</sup> Department of Urology, University Vita e Salute-San Raffaele, Milan, Italy

<sup>r</sup> Department of Translational Medicine, Lund University, Malmö, Sweden

**Word count of text:** 3305

**Word count of the abstract:** 380

**Key words:** Prostate cancer, diagnostic factor, prognostic factors, big data, RWE

**Email addresses co-authors:**

lisa.moris1506@gmail.com<sup>b</sup>; lardamk@gmail.com<sup>c</sup>; anna.haire@kcl.ac.uk<sup>a</sup>;  
Barletta.Francesco@hsr.it<sup>d</sup>; Scuderi.Simone@hsr.it<sup>d</sup>; megan.molnar@bayer.com<sup>e</sup>;  
ronald.herrera@bayer.com<sup>e</sup>; dr.rauf82@gmail.com<sup>f</sup>; riccardo.campi@gmail.com<sup>g</sup>; isabella-  
greco@live.it<sup>g</sup>; urologgg@mail.ru<sup>h</sup>; saeed.dabestani@gmail.com<sup>i</sup>;  
vandenbroeck.thomas@gmail.com<sup>b</sup>; asujenthiran@doctors.net.uk<sup>j</sup>; maurogacci@yahoo.it<sup>g</sup>;  
gandaglia.giorgio@hsr.it<sup>d</sup>; m.i.omar@abdn.ac.uk<sup>k</sup>; steven.maclennan@abdn.ac.uk<sup>k</sup>;  
m.roobol@erasmusmc.nl<sup>l</sup>; bahman.farahmand@bayer.com<sup>m</sup>; eleni.vradi@bayer.com<sup>e</sup>;  
Zsuzsanna.Devecseri@sanofi.com<sup>n</sup>; alex.asiimwe@bayer.com<sup>e</sup>; jihong.zong@bayer.com<sup>o</sup>;  
s.maclennan@abdn.ac.uk<sup>k</sup>; Laurence.collette@iddi.com<sup>p</sup>; j.ndow@abdn.ac.uk<sup>l</sup>;  
briganti.alberto@hsr.it<sup>d</sup>; anders.bjartell@med.lu.se<sup>r</sup>; mieke.vanhemelrijck@kcl.ac.uk<sup>a</sup>

## Abstract

Introduction: One of the major challenges in the field of diagnostic and prognostic factors is the variety and large amount of clinical data being published at rapid pace. This makes it difficult to incorporate such factors in the clinical day to day management of prostate cancer. As part of the PIONEER Consortium objectives, we have explored which diagnostic and prognostic factors (DPFs) are available in relation to our previously defined clinician and patient-reported outcomes (PROs) for prostate cancer (PCa).

Methods and analysis: We performed a scoping review to identify validated and non-validated studies. After initial screening, we extracted data following the Checklist for Critical Appraisal and Data Extraction for Systematic Reviews of prognostic factor studies (CHARMS-PF) criteria and discussed the identified factors with a multidisciplinary expert group. The quality of the included papers was scored for applicability and risk of bias using validated tools such as PROBAST, QUIPS and QUADAS-2.

The search identified 6,604 studies, from which 489 DPFs were included. Sixty-four of those were internally or externally validated. However, only three studies on diagnostic and seven studies on prognostic factors had a low risk of bias and a low risk concerning applicability.

Most of the DPFs identified require additional evaluation and validation in properly designed studies before they can be recommended for use in clinical practice. The PIONEER online search tool for diagnostic and prognostic factors for prostate cancer will enable researchers to understand the quality of the current research and help them design future studies.

Ethics and Dissemination: There are no ethical implications.

### Strengths and limitations of this study

- A multidisciplinary team including patients, urologists, oncologists, radiation oncologists, methodological experts and pathologists were involved throughout the study.
- The search was restricted from 2014 onwards, to maintain a pragmatic approach.
- The main strength of this study are the extensive and comprehensive search and screening of the studies included.
- Our review aims to inform clinicians and patients about this rapidly evolving field, while the PIONEER online search tool for diagnostic and prognostic factors for prostate cancer will enable researchers to perform future research, and to understand the quality of the current available studies.



## Introduction

Prostate cancer (PCa) accounts for 15% of cancers diagnosed <sup>1</sup> and is the second most common cancer in males worldwide <sup>2</sup>. PCa is clinically and molecularly heterogeneous and is usually suspected based upon the clinical findings of digital rectal examination (DRE) and/or Prostate Specific Antigen (PSA) levels <sup>1</sup>. However, which diagnostic or prognostic factor (DPF) can be used to select patients for specific therapeutic options remains largely unclear <sup>3</sup>. Specific biomarkers in urine or in blood are available on top of traditional PSA testing, such as PCA3, TMPRSS2-ERG fusion, or kallikreins as incorporated in the Phi or 4Kscore test together with other parameters including family history <sup>4-7</sup>. However, the European Association of Urology (EAU) guidelines (2019) currently do not provide general recommendations to implement these biomarkers into routine screening programmes due to limited data <sup>8</sup>. As part of the ASCO guidelines, Eggener et al recommended five commercially available biomarkers which have been shown to provide prognostic significance and additional information beyond standard clinical models in patient selection in the localised context: Oncotype Dx Prostate, Prolaris, Decipher, and ProMark <sup>9</sup>. However, no guidelines have recommended DPFs for other stages of PCa. The expert panel at the APCCC consensus meeting of advanced prostate cancer in Basel 2019, recommended AR-V7 for mCRPC as potentially useful, which ultimately led to the inclusion of AR-V7 testing in the NCCN guidelines <sup>10</sup>.

1  
2  
3 The PIONEER Consortium is an international collaboration coordinated by the European  
4 Association of Urology (EAU), which aims to establish the best evidence-based management  
5 and clinical practice of PCa across all disease stages using the power of big data analytics  
6 towards a more outcome-driven, value-based, and patient-centric healthcare system <sup>11</sup>. A  
7 key objective is to address one of the major challenges within the context of diagnostic or  
8 prognostic biomarkers/factors: the inability to incorporate DPFs into the management of  
9 PCa in terms of screening, diagnosis and treatment. It is therefore important to summarise  
10 and evaluate the evidence. Biomarkers can be classified into different types: diagnostic,  
11 prognostic, predictive, and therapeutic – in this study we focus on the first two. A  
12 diagnostic biomarker or factor is useful when cancer is suspected and allows the early  
13 detection based on symptoms or tests <sup>12</sup>. The overall aim of a diagnostic biomarker is to  
14 distinguish people with the diseases from people without the disease. A prognostic  
15 biomarker or factor is a clinical or biological characteristic which provides information on  
16 the likely course of the disease i.e., biochemical progression or disease recurrence <sup>12</sup>. It  
17 enables clinicians to decide on the most suitable treatment depending on the likely course  
18 of the disease. In the sections below we have used the terms biomarkers and factors  
19 interchangeably. Multiple diagnostic and prognostic factors (DPFs) can be measured in  
20 tissue, blood or urine. These come with different advantages and disadvantages and only a  
21 limited number of factors are currently available for PCa in standard clinical care.  
22  
23  
24  
25  
26  
27  
28  
29  
30  
31  
32  
33  
34  
35  
36  
37  
38  
39  
40  
41  
42  
43  
44  
45  
46  
47  
48  
49  
50  
51

52 We aimed to systematically review the evidence from 2014 onward to assess which DPFs  
53 are available in relation to previously defined outcomes for PCa.  
54  
55  
56  
57  
58  
59  
60

## Methods

The systematic scoping review followed the methodology developed by the Joanna Briggs Institute guidelines (14) and the framework by Arksey and O'Malley<sup>13</sup>. We applied Preferred Reporting Items for Systematic Reviews and Meta-Analyses-ScR extension for scoping reviews<sup>14</sup>. A detailed protocol of the overall project was published elsewhere<sup>15</sup>. Briefly, we followed the following four steps (Figure 1):

- (1) Comprehensive systematic literature review of DPFs for all stages of PCa (localised, locally advanced, metastatic, and non-metastatic castration resistant) from 2014 onwards. DPFs developed before 2014 were not included, due to the significant changes which influence the staging of PCa (i.e., Consensus Conference on Gleason Grading of Prostatic Carcinoma (60)) have taken place in diagnostic and prognostic practice and patient management.
- (2) Assessment and identification of final list of DPFs by a multidisciplinary expert panel.
- (3) Evaluation of quality of studies published using risk of bias tools: Prediction model Risk Of Bias (RoB) Assessment Tool (PROBAST) if applicable; or Quality in Prognostic Studies (QUIPS) tool for prognostic and the Quality Assessment of Diagnostic Accuracy Studies 2 (QUADAS-2) tool for diagnostic factors;
- (4) Due to the heterogeneity of the studies identified no further formal quantitative assessments in the form of a meta-analysis could be performed. Hence, the findings of stages 1-3 have been reported here as the results of a scoping review.

## Results

### Stage 1: Comprehensive literature review

Stage 1 identified 6,604 citations and contained three independent searches. We developed the search criteria for the first search with an information scientist who specialises in systematic reviews for urology. The second search was developed following a consultation with an independent information scientist group who excluded row 12, 14 and 16 of Table 1 (see supplementary material). We screened the EAU Guidelines reference list for PCa in our third search. After removing duplicates, we screened 4,215 abstracts, from which 489 met the inclusion criteria.

### Stage 2: Multidisciplinary expert meeting

On the 20<sup>th</sup> of March 2020, we invited a group of multidisciplinary participants to discuss the identified articles on DPFs (see supplementary material Table 2). The participants were presented the search criteria and the extracted data. Data extraction followed the CHARMS-PF checklist and we added author and year of publication. The group discussed the results and additional literature on DPFs was suggested to help the classification of the DPFs, such as the ASCO Guideline on Molecular Biomarkers in Localized Prostate Cancer<sup>16</sup>.

### Stage 3: Evaluation of quality of studies published using the risk of bias tools

Prior to the evaluation of the quality of studies, an initial pilot screening to prepare the raters for the use of PROBAST, QUADAS-2, QUIPS was performed. This aimed to reach consensus on how to judge the domains of the assessments using the three RoB tools. Two urologists (FB, SS) and two epidemiologists (AH, KB) were involved in the pilot assessments.

1  
2  
3 The group discussed any discrepancies. Articles which presented the development and  
4 validation, the internal validation or the external validation of a diagnostic or prognostic  
5 model were assessed with PROBAST. Papers assessing single biomarkers or with/without  
6 validation were assessed with QUIPs for prognostic or QUADAS-2 for diagnostic biomarkers.  
7  
8 The 489 articles were equally divided between six groups. The six groups received the  
9 guidance documents which were identified during the pilot phase<sup>17-21</sup>. In addition, MvH and  
10 KB discussed questions with each individual group.  
11  
12

### 21 *Evaluation of quality of studies published using QUADAS-2*

23 The RoB of diagnostic factors without validation or single validated factors was evaluated  
24 using QUADAS-2. We assessed the following four domains: patient selection, index test,  
25 reference standards and flow and timing. The first three domains are assessed looking at  
26 applicability and all four domains were assessed in terms of RoB<sup>21</sup>. We created a summative  
27 score after the diagnostic studies were assessed by two reviewers and in case of  
28 disagreement a third reviewer assessed the study. The RoB of the 41 included studies was  
29 low for 10 studies, high for 23 studies and unclear for eight. RoB concerning applicability  
30 was low for 10 studies, high for 21 studies and unclear for 10 studies (see Table 1). Table 2  
31 shows the studies with an overall low RoB across both categories. Two studies were  
32 identified to have an overall low RoB<sup>22 23</sup>.  
33  
34  
35  
36  
37  
38  
39  
40  
41  
42  
43  
44  
45  
46  
47  
48  
49  
50

### 51 *Evaluation of quality of studies published using PROBAST (Diagnostic)*

53 The RoB of internal or external validated diagnostic models was assessed using the PROBAST  
54 RoB tool. PROBAST includes four domains assessing the RoB (i.e., participants, predictors,  
55 outcome and analysis) and four domains assessing applicability (i.e., participants, predictors  
56  
57  
58  
59  
60

1  
2  
3 and outcome) (see supplementary material Table 3 for scoring information). We identified  
4  
5 20 papers to be assessed with PROBAST. The RoB of three papers was low, that of 14 was  
6  
7 high and was unclear for three. The applicability of eight papers was high and was unclear  
8  
9 for two (see Table 3). Table 3 in the supplementary material shows the criteria on how to  
10  
11 judge the RoB. One study had an overall low RoB across both domains. All categories except  
12  
13 'predictors' was scored to have a low risk of bias. There was little information available for  
14  
15 the category predictors and therefore it was scored as 'unclear' (see Table 4).  
16  
17  
18  
19  
20  
21  
22

### 23 *Evaluation of quality of studies published using QUIPS*

24  
25 To assess the articles which are single factors or were not internally or externally validated,  
26  
27 we used the QUIPS rating procedure. We identified 385 articles to be assessed with QUIPS.  
28  
29 To standardise the approach across raters, we used the QUIPS electronic spreadsheet  
30  
31 (excel) from Hayden et al <sup>17</sup>. The 12 assessors independently inserted the relevant  
32  
33 information and assessed each domain such as participation, attrition, prognostic factor  
34  
35 confounding and statistical analysis and reporting.  
36  
37  
38  
39  
40

41  
42 There are no rules available for QUIPS on how to score the overall RoB of a paper. Due to  
43  
44 the large number of papers and the need for synthesis, we followed Grooten et al's  
45  
46 suggestions to categorise on the following criteria: 1) Paper was classified as low RoB if all  
47  
48 domains were classified as having low RoB, or up to one moderate RoB; 2) Paper was  
49  
50 classified as high RoB if one or more domains were classified as having high RoB, or  $\geq 3$   
51  
52 moderate RoB; 3) Paper was classified as having moderate RoB if all papers in between 1 or  
53  
54 2 (see table 5 and in supplementary material table 4) <sup>20</sup>. This assessment was based on the  
55  
56 risk scores of individual assessments within the group. If the overall assessment was not  
57  
58  
59  
60

1  
2  
3 possible due to differences in the individual category, a third assessor reviewed the  
4  
5 assessments and the results were discussed. 387 prognostic factors were assessed using  
6  
7 QUIPs. 307 papers were classified as high RoB. Forty-nine papers were classified as having a  
8  
9 moderate RoB and 28 papers were scored as low RoB (see Table 5). Out of the 28 papers  
10  
11 with a low RoB, the most common moderate bias was linked to attrition (12 papers),  
12  
13 followed by confounding (4 papers), participation (3 papers), outcome (1 paper), statistical  
14  
15 analysis (1 paper) (see Table 6).  
16  
17  
18  
19  
20  
21  
22  
23

#### 24 *Evaluation of quality of studies published using PROBAST (Prognostic)*

25  
26 The RoB of Prognostic validated models were assessed using PROBAST. As highlighted  
27  
28 above, PROBAST includes four domains assessing the RoB (i.e., participants, predictors,  
29  
30 outcome and analysis) and four domains assessing applicability (i.e., participants, predictors  
31  
32 and outcome). The assessors identified 44 papers to be assessed with PROBAST, of those  
33  
34 three scored a low RoB, 27 a high risk of bias and 13 were assessed as unclear (see Table 7).  
35  
36 In terms of applicability, 15 papers scored low, 20 high and eight unclear. Two papers were  
37  
38 scored to have an overall low RoB <sup>24 25</sup> (see Table 4).  
39  
40  
41  
42  
43  
44  
45  
46  
47  
48  
49

#### 50 *Characteristics of studies identified with low risk of bias*

51  
52 Details of the identified validated DPF models with an adequate quality are presented in  
53  
54 Table 8. We identified 32 studies with an overall low RoB (assessed with PROBAST, QUIPS,  
55  
56 QUADAS-2). Out of these 32 studies, we identified one validated diagnostic model (assessed  
57  
58 with PROBAST) <sup>26</sup>, two validated prognostic models (assessed with PROBAST) <sup>24 25</sup>, two non-  
59  
60

1  
2  
3 validated diagnostic single factors (assessed with QUADAS-2)<sup>22,23</sup> and 25 prognostic factors  
4  
5 (assessed with QUIPS)<sup>22-52</sup> which have not been validated and two single prognostic factors  
6  
7 which have been validated (assessed with QUIPS)<sup>36,52</sup>. Prognostic factors assessed with  
8  
9 QUIPS were identified with a low risk of bias for the localised PCa population. Sixty-seven  
10  
11 percent of the low RoB DPFs were intended to be measured after the treatment was  
12  
13 performed. In addition, the most commonly measured outcome was biochemical recurrence  
14  
15 (BRC) followed by overall survival (OS). It is, however, important to take into consideration  
16  
17 that even though from the studies assessed with a low RoB, only two out of the 32 were of a  
18  
19 non-observational study design.  
20  
21  
22  
23  
24

25  
26 As highlighted above, we identified three validated DPFs which were scored to have a low  
27  
28 RoB and low risk concerning applicability. Firstly, we identified the 'Unified Prostate Cancer  
29  
30 Risk Prediction Model Combining the Stockholm3 Test and Magnetic Resonance Imaging', a  
31  
32 risk prediction model which combines clinical variables, genetic and protein biomarkers.  
33  
34 Five hundred and thirty two men were involved across three centres<sup>53</sup>. Secondly, the  
35  
36 DREAM challenge developed a set of five standardised raw event-level tables, using  
37  
38 laboratory values, patients' demographic information, medical history, lesion sites, previous  
39  
40 treatments, and vital signs of patients with metastatic castration-resistant PCa. These  
41  
42 variables were combined by using data from four clinical trials<sup>54</sup>. Thirdly, Joniau et al.  
43  
44 developed 'Pretreatment Tables' to predict the pathologic stage of locally advanced  
45  
46 prostate cancer after RP based on pre-treatment PSA level and biopsy Gleason score<sup>25</sup>.  
47  
48  
49  
50  
51

52  
53 We identified two single factors which were validated and had low RoB. Firstly, Lara et al.,  
54  
55 assessed and validated the serum biomarkers of bone metabolism (N-telopeptide and  
56  
57 pyridinoline) and formation (C-terminal collagen propeptide and bone alkaline  
58  
59  
60



1  
2  
3 phosphatase)) in 778 CRPC patients as part of the randomized phase III SWOG trial (S0421)  
4  
5 of docetaxel/prednisone with or without atrasentan <sup>36</sup>. Secondly, Berg et al, showed that  
6  
7 ERG expression can be used to estimate the risk of progression during AS including 265  
8  
9 patients at diagnosis and progression during AS <sup>52</sup>.  
10  
11

### 12 13 **Patient and public Involvement**

14  
15  
16 This project has been overseen by a multi-stakeholder group part of the PIONEER  
17  
18 Consortium. PIONEER brings together 32 key stakeholders from academic institutions,  
19  
20 patient advocacy groups, European organisations, experts in legal data management,  
21  
22 clinician and pharmaceutical companies, as well as regulatory agencies, economics and  
23  
24 ethics, and information and technology specialists. Patients and their family members are  
25  
26 therefore involved and actively participate as an integral part of all research conducted by  
27  
28 the PIONEER Consortium.  
29  
30  
31  
32  
33  
34  
35  
36  
37

### 38 **Discussion**

39  
40 Despite the large number of studies on DPFs which are published every year, there is a  
41  
42 paucity of DPFs that are suitable to be incorporated into clinical practice. The majority of  
43  
44 DPFs have not yet been validated and are identified in poor quality studies. Our analysis  
45  
46 found that most identified studies had a high to moderate risk of bias due to poor design  
47  
48 standards, conduct, reporting and/or analysis i.e. generalizability and size of the population,  
49  
50 poor model development (no testing or missing important confounders) or only correlation  
51  
52 studies, missing data was rarely reported. However, we did identify a small number of  
53  
54 validated DPFs with low RoB. We identified three validated models which combine: firstly,  
55  
56  
57  
58  
59  
60

1  
2  
3 clinical variables, genetic and protein biomarkers, and improved the clinical outcome  
4  
5 performance of prostate cancer diagnostics (The Unified Prostate Cancer Risk Prediction  
6  
7 Model) <sup>53</sup>; secondly, laboratory values, patients' demographic information, medical history,  
8  
9 lesion sites, previous treatments, and vital signs of patients with metastatic castration-  
10  
11 resistant PCa (DREAM challenge) <sup>54</sup>; thirdly, pre-treatment PSA level and biopsy Gleason  
12  
13 score to predict the pathologic stage of locally advanced PCa ('Pretreatment Tables') <sup>25</sup>.  
14  
15  
16 Two single factors have been validated: the serum biomarkers of bone metabolism in CRPC  
17  
18 patients <sup>36</sup> and the ERG expression, which can be used to estimate the risk of progression  
19  
20 during AS <sup>52</sup>, which has been already highlighted in the clinical guidelines <sup>1</sup>.  
21  
22  
23  
24  
25

26 Aladawani et al assessed prediction models for PCa to be used in primary care settings in  
27  
28 their systematic review and identified five models which met their inclusion criteria. From  
29  
30 these identified models only one model was externally validated and only one (the Lazzari  
31  
32 model 2 <sup>55</sup>) had the potential to be implemented in primary care. Lazzari et al. had the  
33  
34 lowest RoB (based on PROBAST), however it must be externally validated before it can be  
35  
36 implemented. Hence, Aladawani et al also concluded that the existing models have  
37  
38 limitations concerning study design and reporting performance <sup>56</sup>.  
39  
40  
41  
42

43 Tian et al conducted a review on biomarkers for CRPC patients, however their quality  
44  
45 assessment was focused on study design (RCT vs observational study), whereas we focused  
46  
47 on biomarker specific tools <sup>57</sup>. Whilst Tian et al and our review identified similar factors and  
48  
49 quality scores, there were slight discrepancies between the overall RoB assessments. Tian et  
50  
51 al. used an overall quality assessment scale from 1-6 instead of low, medium and high. In  
52  
53 their assessment the validated prognostic study by Lara et al. <sup>36</sup> and the non-validated  
54  
55 prognostic factor by Pei et al. <sup>43</sup> were scored on the quality scale as 4 (medium quality). We  
56  
57  
58  
59  
60

1  
2  
3 assessed Lara et al. <sup>36</sup> to have a low risk of bias with a moderate risk of confounding and Pei  
4  
5 et al. <sup>43</sup> with a moderate risk of bias concerning the prognostic factor itself. This might  
6  
7 explain the discrepancies between the two quality assessments. The reports by Alvim et al.,  
8  
9 Qu et al., were assessed to have the highest quality by Tian et al <sup>57</sup>, similar to our review.  
10  
11 This illustrates that different quality assessment tools emphasize different criteria, which  
12  
13 may result in small discrepancies. However, the overall conclusion for prognostic single  
14  
15 factors was similar in our review and to the work of Tian et al. <sup>57</sup>.  
16  
17

18  
19 Similar issues have been identified for other urological cancers. For example, in kidney  
20  
21 cancer, a large body of research was identified by Harrison et al., with very few validated  
22  
23 studies and lots of heterogeneity <sup>58</sup>. Schmitz-Dräger et al. published an International  
24  
25 Consultation of Urologic Disease (ICUD)/World Health Organization (WHO) Consensus  
26  
27 manuscript where they identified that in bladder cancer one of the main limitations for the  
28  
29 lack of incorporation of modern bladder cancer tests into clinical practice decision making is  
30  
31 linked to the scarcity of 'good clinical practice guidelines' for the evaluation of diagnostic  
32  
33 markers.  
34  
35  
36  
37  
38  
39

40  
41 There is a need for improved guidance on development and validation of diagnostic markers  
42  
43 <sup>59</sup>. To meet that need, we are developing the PIONEER DPF search tool, which will help researchers  
44  
45 and clinicians to get a better understanding of the DPFs for prostate cancer. The tool will not  
46  
47 only summarise all relevant studies, but also provide information on the use and results of  
48  
49 different RoB assessment tools, which will enable an understanding of the quality of  
50  
51 published studies.  
52  
53  
54  
55  
56  
57  
58  
59  
60

1  
2  
3 Future research should therefore focus on addressing the identified shortcomings such as  
4 heterogeneity, validation and poor RoB by designing more robust studies which consistently  
5 include RoB assessments such as PROBAST, QUIPS or QUADAS-2.  
6  
7  
8  
9

10  
11 With the growing number of various therapeutic options, diagnosis and management of  
12 prostate cancer require an individualised approach to patient care. There is an unmet need  
13 for DPFs to guide decisions for optimal treatment and predict which patients will benefit the  
14 most, from a particular management strategy. DPFs could potentially enhance the quality of  
15 patient counselling, but currently most need additional evaluation and validation in properly  
16 designed studies. Our systematic review highlights the need for well-designed Real-World  
17 Evidence studies, while the PIONEER online search tool can inform the design of new  
18 research studies, through providing a rigorous evaluation of the methodological quality of  
19 the studies.  
20  
21  
22  
23  
24  
25  
26  
27  
28  
29  
30  
31  
32

33  
34 The main strength of this study are the extensive and comprehensive search and screening  
35 of the studies included. In addition, we are developing an online search tool which  
36 showcases the identified and assessed studies. It provides an overview of the available DPFS  
37 and enables interested stakeholders to search for DPFs. To our knowledge, this is the first  
38 study which has been performed with this extensive amount of literature.  
39  
40  
41  
42  
43  
44  
45

### 46 **Limitations**

47  
48  
49 Even though this review included three searches and assessments by a multidisciplinary  
50 group of fourteen researchers, we recognise potential limitations. Studies were only  
51 included from 2014 onwards and DPFs developed before 2014 were not included. However,  
52 significant changes which influence the staging of PCa (i.e., Consensus Conference on  
53 Gleason Grading of Prostatic Carcinoma <sup>60</sup>) have taken place in diagnostic and prognostic  
54  
55  
56  
57  
58  
59  
60

1  
2  
3 practice and patient management. This changed the staging of the patient population and  
4  
5 therefore has an impact on DPFs.  
6  
7

8  
9 In addition, there is a potential of subjectivity in the evaluation of the studies. Even though  
10  
11 the studies have been assessed in duplicate, there might be variation across groups.  
12

13  
14 However, given the overall moderate to high risk of bias, this does not influence the overall  
15  
16 recommendation of the project.  
17

## 18 19 **Conclusion**

20  
21  
22 At present DPFs that are capable of significantly improving diagnosis and prognosis in  
23  
24 prostate cancer are an unmet need as most of the DPFs identified require additional  
25  
26 evaluation and validation in properly designed studies before they can be recommended for  
27  
28 use in clinical practice. Well-designed RWE studies can help to increase quality. Our review  
29  
30 aims to inform clinicians and patients about this rapidly evolving field, while the PIONEER  
31  
32 online search tool for diagnostic and prognostic factors for prostate cancer will enable  
33  
34 researchers to perform future research, and to understand the quality of the current  
35  
36 available studies.  
37  
38  
39  
40  
41  
42  
43  
44  
45  
46  
47  
48  
49  
50  
51  
52  
53  
54  
55  
56  
57  
58  
59  
60

1  
2  
3  
4  
5  
6  
7 Twitter: @ProstatePioneer

8  
9 Acknowledgement: PIONEER Consortium

10  
11  
12 Contributors: PIONEER Consortium

13  
14  
15 Funding: PIONEER is funded through the IMI2 Joint Undertaking and is listed under Grant  
16 Agreement No. 777492 and is part of the Big Data for Better Outcomes Programme  
17  
18 (BD4BO). IMI2 receives support from the European Union's Horizon 2020 research and  
19  
20 innovation programme and the European Federation of Pharmaceutical Industries and  
21  
22 Associations (EFPIA).  
23  
24  
25  
26  
27

28 Competing interests: We have nothing to declare.  
29  
30  
31  
32  
33  
34  
35  
36  
37  
38  
39  
40  
41  
42  
43  
44  
45  
46  
47  
48  
49  
50  
51  
52  
53  
54  
55  
56  
57  
58  
59  
60

## References

1. Mottet N, Briers E, Bolla M, Bourke L, Cornford P, De Santis M, Henry A, Joniau S, Lam T, Mason M.D., Van den Poel H, Van den Kwast T.H., Rouvière O, Wiegel T.; members of the EAU – ESTRO – ESUR – SIOG Prostate Cancer Guidelines Panel. EAU – ESTRO – ESUR – SIOG Guidelines on Prostate Cancer. EAU Annual Congress. Milan: EAU Guidelines Office, 2021.
2. Bray F, Ferlay J, Soerjomataram I, et al. Global cancer statistics 2018: GLOBOCAN estimates of incidence and mortality worldwide for 36 cancers in 185 countries. *CA: a cancer journal for clinicians* 2018;68(6):394-424. doi: 10.3322/caac.21492 [published Online First: 2018/09/13]
3. Filella X, Fernandez-Galan E, Fernandez Bonifacio R, et al. Emerging biomarkers in the diagnosis of prostate cancer. *Pharmacogenomics and personalized medicine* 2018;11:83-94. doi: 10.2147/pgpm.S136026 [published Online First: 2018/05/31]
4. Vedder MM, de Bekker-Grob EW, Lilja HG, et al. The added value of percentage of free to total prostate-specific antigen, PCA3, and a kallikrein panel to the ERSPC risk calculator for prostate cancer in prescreened men. *Eur Urol* 2014;66(6):1109-15. doi: 10.1016/j.eururo.2014.08.011 [published Online First: 2014/08/30]
5. Leyten GH, Hessels D, Jannink SA, et al. Prospective multicentre evaluation of PCA3 and TMPRSS2-ERG gene fusions as diagnostic and prognostic urinary biomarkers for prostate cancer. *Eur Urol* 2014;65(3):534-42. doi: 10.1016/j.eururo.2012.11.014 [published Online First: 2012/12/04]
6. Boegemann M, Stephan C, Cammann H, et al. The percentage of prostate-specific antigen (PSA) isoform [-2]proPSA and the Prostate Health Index improve the diagnostic accuracy for clinically relevant prostate cancer at initial and repeat biopsy compared with total PSA and percentage free PSA in men aged  $\leq 65$  years. *BJU international* 2016;117(1):72-9. doi: 10.1111/bju.13139 [published Online First: 2015/03/31]
7. Bryant RJ, Sjoberg DD, Vickers AJ, et al. Predicting high-grade cancer at ten-core prostate biopsy using four kallikrein markers measured in blood in the ProtecT study. *J Natl Cancer Inst* 2015;107(7) doi: 10.1093/jnci/djv095 [published Online First: 2015/04/12]
8. Mottet N, Bellmunt J, Bolla M, et al. EAU-ESTRO-SIOG Guidelines on Prostate Cancer. Part 1: Screening, Diagnosis, and Local Treatment with Curative Intent. *Eur Urol* 2017;71(4):618-29. doi: 10.1016/j.eururo.2016.08.003 [published Online First: 2016/08/30]
9. Eggener SE, Rumble RB, Armstrong AJ, et al. Molecular Biomarkers in Localized Prostate Cancer: ASCO Guideline. *Journal of Clinical Oncology* 2019;38(13):1474-94. doi: 10.1200/JCO.19.02768
10. Gillessen S, Attard G, Beer TM, et al. Management of Patients with Advanced Prostate Cancer: Report of the Advanced Prostate Cancer Consensus Conference 2019. *European Urology* 2020;77(4):508-47. doi: <https://doi.org/10.1016/j.eururo.2020.01.012>
11. Omar M, Roobol M, Ribal M, et al. Author Correction: Introducing PIONEER: a project to harness big data in prostate cancer research. *Nature Reviews Urology* 2020;17 doi: 10.1038/s41585-020-0355-3
12. Carlomagno N, Incollingo P, Tammaro V, et al. Diagnostic, Predictive, Prognostic, and Therapeutic Molecular Biomarkers in Third Millennium: A Breakthrough in Gastric Cancer. *Biomed Res Int* 2017;2017:7869802. doi: 10.1155/2017/7869802 [published Online First: 2017/11/03]
13. Arksey H, O'Malley L. Scoping studies: towards a methodological framework. *International Journal of Social Research Methodology* 2005;8(1):19-32. doi: 10.1080/1364557032000119616
14. Tricco AC, Lillie E, Zarin W, et al. PRISMA Extension for Scoping Reviews (PRISMA-ScR): Checklist and Explanation. *Ann Intern Med* 2018;169(7):467-73. doi: 10.7326/m18-0850 [published Online First: 2018/09/05]
15. Beyer K, Moris L, Lardas M, et al. Diagnostic and prognostic factors in patients with prostate cancer: a systematic review protocol. *BMJ Open* 2021;11(2):e040531. doi: 10.1136/bmjopen-2020-040531

16. Eggener SE, Rumble RB, Armstrong AJ, et al. Molecular Biomarkers in Localized Prostate Cancer: ASCO Guideline. *J Clin Oncol* 2020;38(13):1474-94. doi: 10.1200/jco.19.02768 [published Online First: 2019/12/13]
17. Hayden JA, van der Windt DA, Cartwright JL, et al. Assessing bias in studies of prognostic factors. *Ann Intern Med* 2013;158(4):280-6. doi: 10.7326/0003-4819-158-4-201302190-00009 [published Online First: 2013/02/20]
18. Moons KGM, Wolff RF, Riley RD, et al. PROBAST: A Tool to Assess Risk of Bias and Applicability of Prediction Model Studies: Explanation and Elaboration. *Ann Intern Med* 2019;170(1):W1-w33. doi: 10.7326/m18-1377 [published Online First: 2019/01/01]
19. Riley RD, Moons KGM, Snell KIE, et al. A guide to systematic review and meta-analysis of prognostic factor studies. *Bmj* 2019;364:k4597. doi: 10.1136/bmj.k4597 [published Online First: 2019/02/01]
20. Grooten WJA, Tseli E, Ång BO, et al. Elaborating on the assessment of the risk of bias in prognostic studies in pain rehabilitation using QUIPS—aspects of interrater agreement. *Diagnostic and Prognostic Research* 2019;3(1):5. doi: 10.1186/s41512-019-0050-0
21. Whiting PF, Rutjes AW, Westwood ME, et al. QUADAS-2: a revised tool for the quality assessment of diagnostic accuracy studies. *Ann Intern Med* 2011;155(8):529-36. doi: 10.7326/0003-4819-155-8-201110180-00009 [published Online First: 2011/10/19]
22. Hagiwara K, Tobisawa Y, Kaya T, et al. Wisteria floribunda Agglutinin and Its Reactive-Glycan-Carrying Prostate-Specific Antigen as a Novel Diagnostic and Prognostic Marker of Prostate Cancer. *Int J Mol Sci* 2017;18(2) doi: 10.3390/ijms18020261 [published Online First: 2017/01/31]
23. Kelly BD, Miller N, Sweeney KJ, et al. A Circulating MicroRNA Signature as a Biomarker for Prostate Cancer in a High Risk Group. *J Clin Med* 2015;4(7):1369-79. doi: 10.3390/jcm4071369 [published Online First: 2015/08/05]
24. Guinney J, Wang T, Laajala TD, et al. Prediction of overall survival for patients with metastatic castration-resistant prostate cancer: development of a prognostic model through a crowdsourced challenge with open clinical trial data. *The Lancet Oncology* 2017;18(1):132-42. doi: 10.1016/s1470-2045(16)30560-5 [published Online First: 2016/11/20]
25. Joniau S, Spahn M, Briganti A, et al. Pretreatment tables predicting pathologic stage of locally advanced prostate cancer. *Eur Urol* 2015;67(2):319-25. doi: 10.1016/j.eururo.2014.03.013 [published Online First: 2014/04/02]
26. Palsdottir T, Nordström T, Aly M, et al. A Unified Prostate Cancer Risk Prediction Model Combining the Stockholm3 Test and Magnetic Resonance Imaging. *Eur Urol Oncol* 2019;2(5):490-96. doi: 10.1016/j.euo.2018.09.008 [published Online First: 2019/08/15]
27. Aguilera A, Bañuelos B, Díez J, et al. Biochemical recurrence risk factors in surgically treated high and very high-risk prostate tumors. *Cent European J Urol* 2015;68(3):302-7. doi: 10.5173/ceju.2015.485 [published Online First: 2015/11/17]
28. Bramhecha YM, Rouzbeh S, Guérard K-P, et al. The combination of PTEN deletion and 16p13.3 gain in prostate cancer provides additional prognostic information in patients treated with radical prostatectomy. *Modern Pathology* 2019;32(1):128-38. doi: 10.1038/s41379-018-0107-6
29. Alvim RG, Audenet F, Vertosick EA, et al. Performance Prediction for Surgical Outcomes in Partial Nephrectomy Using Nephrometry Scores: A Comparison of Arterial Based Complexity (ABC), RENAL, and PADUA Systems. *Eur Urol Oncol* 2018;1(5):428-34. doi: 10.1016/j.euo.2018.05.004 [published Online First: 2019/06/04]
30. Bruce HM, Stricker PD, Gupta R, et al. Loss of AZGP1 as a Superior Predictor of Relapse in Margin-Positive Localized Prostate Cancer. *Prostate* 2016;76(16):1491-500. doi: 10.1002/pros.23233 [published Online First: 2016/10/19]



- 1
  - 2
  - 3
  - 4
  - 5
  - 6
  - 7
  - 8
  - 9
  - 10
  - 11
  - 12
  - 13
  - 14
  - 15
  - 16
  - 17
  - 18
  - 19
  - 20
  - 21
  - 22
  - 23
  - 24
  - 25
  - 26
  - 27
  - 28
  - 29
  - 30
  - 31
  - 32
  - 33
  - 34
  - 35
  - 36
  - 37
  - 38
  - 39
  - 40
  - 41
  - 42
  - 43
  - 44
  - 45
  - 46
  - 47
  - 48
  - 49
  - 50
  - 51
  - 52
  - 53
  - 54
  - 55
  - 56
  - 57
  - 58
  - 59
  - 60
31. Francini E, Gray KP, Xie W, et al. Time of metastatic disease presentation and volume of disease are prognostic for metastatic hormone sensitive prostate cancer (mHSPC). *The Prostate* 2018;78(12):889-95. doi: <https://doi.org/10.1002/pros.23645>
32. Hamada R, Nakashima J, Ohori M, et al. Preoperative predictive factors and further risk stratification of biochemical recurrence in clinically localized high-risk prostate cancer. *International journal of clinical oncology* 2016;21(3):595-600. doi: 10.1007/s10147-015-0923-3
33. Hashimoto T, Nakashima J, Inoue R, et al. The significance of micro-lymphatic invasion and pathological Gleason score in prostate cancer patients with pathologically organ-confined disease and negative surgical margins after robot-assisted radical prostatectomy. *International journal of clinical oncology* 2020;25(2):377-83. doi: 10.1007/s10147-019-01561-4
34. Kato M, Kimura K, Hirakawa A, et al. Prognostic parameter for high risk prostate cancer patients at initial presentation. *Prostate* 2018;78(1):11-16. doi: 10.1002/pros.23438 [published Online First: 2017/11/03]
35. Kluth LA, Xylinas E, Rieken M, et al. Does increasing the nodal yield improve outcomes in contemporary patients without nodal metastasis undergoing radical prostatectomy? *Urologic oncology* 2014;32(1):47.e1-8. doi: 10.1016/j.urolonc.2013.06.013 [published Online First: 2013/09/24]
36. Lara PN, Jr., Ely B, Quinn DI, et al. Serum biomarkers of bone metabolism in castration-resistant prostate cancer patients with skeletal metastases: results from SWOG 0421. *J Natl Cancer Inst* 2014;106(4):dju013. doi: 10.1093/jnci/dju013 [published Online First: 2014/02/26]
37. Lee S, Kim KB, Jo JK, et al. Prognostic Value of Focal Positive Surgical Margins After Radical Prostatectomy. *Clinical Genitourinary Cancer* 2016;14(4):e313-e19. doi: <https://doi.org/10.1016/j.clgc.2015.12.013>
38. Lévesque E, Caron P, Lacombe L, et al. A Comprehensive Analysis of Steroid Hormones and Progression of Localized High-Risk Prostate Cancer. *Cancer Epidemiol Biomarkers Prev* 2019;28(4):701-06. doi: 10.1158/1055-9965.Epi-18-1002 [published Online First: 2019/02/09]
39. Lin YL, Li YL, Ma JG. Aberrant Promoter Methylation of Protocadherin8 (PCDH8) in Serum is a Potential Prognostic Marker for Low Gleason Score Prostate Cancer. *Med Sci Monit* 2017;23:4895-900. doi: 10.12659/msm.904366 [published Online First: 2017/10/14]
40. Löffeler S, Weedon-Fekjaer H, Wang-Hansen MS, et al. "Natural course" of disease in patients with metastatic castrate-resistant prostate cancer: Survival and prognostic factors without life-prolonging treatment. *Scand J Urol* 2015;49(6):440-45. doi: 10.3109/21681805.2015.1059881 [published Online First: 2015/07/04]
41. Narang AK, Trieu J, Radwan N, et al. End-of-radiation PSA as a novel prognostic factor in patients undergoing definitive radiation and androgen deprivation therapy for prostate cancer. *Prostate Cancer Prostatic Dis* 2017;20(2):203-09. doi: 10.1038/pcan.2016.67 [published Online First: 2017/01/18]
42. Ozden C, Aktas BK, Bulut S, et al. Effect of age on biochemical recurrence after radical prostatectomy. *Kaohsiung J Med Sci* 2017;33(2):91-95. doi: 10.1016/j.kjms.2016.11.002 [published Online First: 2017/02/01]
43. Pei XQ, He DL, Tian G, et al. Prognostic factors of first-line docetaxel treatment in castration-resistant prostate cancer: roles of neutrophil-to-lymphocyte ratio in patients from Northwestern China. *International urology and nephrology* 2017;49(4):629-35. doi: 10.1007/s11255-017-1524-z [published Online First: 2017/02/06]
44. Qu Y, Zhang C, Du E, et al. Pim-3 is a Critical Risk Factor in Development and Prognosis of Prostate Cancer. *Med Sci Monit* 2016;22:4254-60. doi: 10.12659/msm.898223 [published Online First: 2016/11/09]

- 1  
2  
3 45. Qu F, Xie W, Nakabayashi M, et al. Association of AR-V7 and Prostate-Specific Antigen RNA Levels  
4 in Blood with Efficacy of Abiraterone Acetate and Enzalutamide Treatment in Men with  
5 Prostate Cancer. *Clin Cancer Res* 2017;23(3):726-34. doi: 10.1158/1078-0432.Ccr-16-1070  
6 [published Online First: 2016/08/05]  
7  
8 46. Rüenauer K, Menon R, Svensson MA, et al. Prognostic significance of YWHAZ expression in  
9 localized prostate cancer. *Prostate Cancer Prostatic Dis* 2014;17(4):310-4. doi:  
10 10.1038/pcan.2014.32 [published Online First: 2014/08/27]  
11  
12 47. Shimodaira K, Nakashima J, Nakagami Y, et al. Prognostic Value of Platelet Counts in Patients  
13 with Metastatic Prostate Cancer Treated with Endocrine Therapy. *Urol J* 2020;17(1):42-49.  
14 doi: 10.22037/uj.v0i0.4735 [published Online First: 2019/03/19]  
15  
16 48. Strand SH, Hoyer S, Lynnerup AS, et al. High levels of 5-hydroxymethylcytosine (5hmC) is an  
17 adverse predictor of biochemical recurrence after prostatectomy in ERG-negative prostate  
18 cancer. *Clin Epigenetics* 2015;7:111. doi: 10.1186/s13148-015-0146-5 [published Online  
19 First: 2015/10/20]  
20  
21 49. Takagi M, Demizu Y, Terashima K, et al. Long-term outcomes in patients treated with proton  
22 therapy for localized prostate cancer. *Cancer Med* 2017;6(10):2234-43. doi:  
23 10.1002/cam4.1159 [published Online First: 2017/09/08]  
24  
25 50. Wang Y, Xu F, Pan J, et al. Platelet to lymphocyte ratio as an independent prognostic indicator for  
26 prostate cancer patients receiving androgen deprivation therapy. *BMC Cancer* 2016;16:329.  
27 doi: 10.1186/s12885-016-2363-5 [published Online First: 2016/05/26]  
28  
29 51. Zacho HD, Gade M, Mortensen JC, et al. Bone Scan Index Is an Independent Predictor of Time to  
30 Castration-resistant Prostate Cancer in Newly Diagnosed Prostate Cancer: A Prospective  
31 Study. *Urology* 2017;108:135-41. doi: 10.1016/j.urology.2017.05.058 [published Online First:  
32 2017/08/02]  
33  
34 52. Berg KD, Vainer B, Thomsen FB, et al. ERG protein expression in diagnostic specimens is  
35 associated with increased risk of progression during active surveillance for prostate cancer.  
36 *Eur Urol* 2014;66(5):851-60. doi: 10.1016/j.eururo.2014.02.058 [published Online First:  
37 2014/03/19]  
38  
39 53. Palsdottir T, Nordström T, Aly M, et al. A Unified Prostate Cancer Risk Prediction Model  
40 Combining the Stockholm3 Test and Magnetic Resonance Imaging. *European Urology*  
41 *Oncology* 2019;2(5):490-96. doi: <https://doi.org/10.1016/j.euo.2018.09.008>  
42  
43 54. Guinney J, Wang T, Laajala TD, et al. Prediction of overall survival for patients with metastatic  
44 castration-resistant prostate cancer: development of a prognostic model through a  
45 crowdsourced challenge with open clinical trial data. *The Lancet Oncology* 2017;18(1):132-  
46 42. doi: [https://doi.org/10.1016/S1470-2045\(16\)30560-5](https://doi.org/10.1016/S1470-2045(16)30560-5)  
47  
48 55. Lazzeri M, Haese A, de la Taille A, et al. Serum isoform [-2]proPSA derivatives significantly  
49 improve prediction of prostate cancer at initial biopsy in a total PSA range of 2-10 ng/ml: a  
50 multicentric European study. *Eur Urol* 2013;63(6):986-94. doi: 10.1016/j.eururo.2013.01.011  
51 [published Online First: 2013/02/05]  
52  
53 56. Aladwani M, Lophatananon A, Ollier W, et al. Prediction models for prostate cancer to be used in  
54 the primary care setting: a systematic review. *BMJ Open* 2020;10(7):e034661. doi:  
55 10.1136/bmjopen-2019-034661 [published Online First: 2020/07/22]  
56  
57 57. Tian S, Lei Z, Gong Z, et al. Clinical implication of prognostic and predictive biomarkers for  
58 castration-resistant prostate cancer: a systematic review. *Cancer Cell Int* 2020;20(1):409. doi:  
59 10.1186/s12935-020-01508-0  
60  
61 58. Harrison H, Thompson RE, Lin Z, et al. Risk Prediction Models for Kidney Cancer: A Systematic  
62 Review. *European urology focus* 2020 doi: <https://doi.org/10.1016/j.euf.2020.06.024>  
63  
64 59. Schmitz-Dräger BJ, Droller M, Lokeshwar VB, et al. Molecular markers for bladder cancer  
65 screening, early diagnosis, and surveillance: the WHO/ICUD consensus. *Urologia*  
66 *internationalis* 2015;94(1):1-24. doi: 10.1159/000369357 [published Online First:  
67 2014/12/17]

- 1  
2  
3 60. Epstein JI, Egevad L, Amin MB, et al. The 2014 International Society of Urological Pathology  
4 (ISUP) Consensus Conference on Gleason Grading of Prostatic Carcinoma: Definition of  
5 Grading Patterns and Proposal for a New Grading System. *The American journal of surgical*  
6 *pathology* 2016;40(2):244-52. doi: 10.1097/pas.0000000000000530 [published Online First:  
7 2015/10/23]  
8  
9 61. Hung SC, Yang CK, Cheng CL, et al. Long-term Oncologic Outcomes of Robotic-assisted Radical  
10 Prostatectomy by a Single Surgeon. *Anticancer Res* 2017;37(8):4157-64. doi:  
11 10.21873/anticanres.11803 [published Online First: 2017/07/26]  
12  
13  
14  
15  
16  
17  
18  
19  
20  
21  
22  
23  
24  
25  
26  
27  
28  
29  
30  
31  
32  
33  
34  
35  
36  
37  
38  
39  
40  
41  
42  
43  
44  
45  
46  
47  
48  
49  
50  
51  
52  
53  
54  
55  
56  
57  
58  
59  
60

For peer review only

1  
2  
3  
4  
5  
6  
7  
8  
9  
10  
11  
12  
13  
14  
15  
16  
17  
18  
19  
20  
21  
22  
23  
24  
25  
26  
27  
28  
29  
30  
31  
32  
33  
34  
35  
36  
37  
38  
39  
40  
41  
42  
43  
44  
45  
46  
47  
48  
49  
50  
51  
52  
53  
54  
55  
56  
57  
58  
59  
60

For peer review only

Table 1: Overall judgment of RoB (QUADAS-2, Diagnostic)

| Overall judgement of RoB | RoB | Applicability |
|--------------------------|-----|---------------|
| Low                      | 10  | 10            |
| High                     | 23  | 21            |
| Unclear                  | 8   | 10            |
| Total                    | 41  |               |

Table 2 non-validated DPFs with overall low risk of bias: QUADAS-2

| Author                  | Year | Patient Selection | Index Test(s) | Reference Standard | Flow and Timing | Patient Selection | Index Test(s) | Reference Standard | RoB | Applicability |
|-------------------------|------|-------------------|---------------|--------------------|-----------------|-------------------|---------------|--------------------|-----|---------------|
| <i>Hagiwara, et al.</i> | 2017 | low               | low           | low                | low             | low               | low           | low                | low | low           |
| <i>Kelly, et al.</i>    | 2015 | low               | low           | low                | low             | low               | low           | low                | low | low           |

Table 3: Judgment of RoB (PROBAST, Diagnostic)

| Overall judgement of RoB | RoB | Applicability |
|--------------------------|-----|---------------|
| Low                      | 3   | 8             |
| High                     | 14  | 10            |
| Unclear                  | 3   | 2             |
| Total                    | 20  |               |

Table 4: PROBAST

| Author                   | ROB          |            |         |          | APPLICABILITY |            |         | Overall |               |
|--------------------------|--------------|------------|---------|----------|---------------|------------|---------|---------|---------------|
|                          | Participants | Predictors | Outcome | Analysis | Participants  | Predictors | Outcome | ROB     | Applicability |
| Diagnostic               |              |            |         |          |               |            |         |         |               |
| <i>Guinney, et al.</i>   | Low          | Low        | Low     | Low      | Low           | Low        | Low     | Low     | Low           |
| <i>Joniau, et al.</i>    | Low          | Low        | Low     | Low      | Low           | Low        | Low     | Low     | Low           |
| Prognostic               |              |            |         |          |               |            |         |         |               |
| <i>Palsdottir, et al</i> | low          | Unclear    | low     | low      | low           | low        | low     | low     | low           |

Table 5: Overall judgment of RoB (QUIPS, Prognostic)

| Overall judgement of RoB | RoB |
|--------------------------|-----|
| Low                      | 29  |
| Moderate                 | 49  |
| High                     | 307 |
| Total                    | 385 |

Table 6 DPFs with low risk of bias: QUIPS

| STUDY                    | Time | BIASES        |           |                   | Applicability |             |                                    | Overall score |
|--------------------------|------|---------------|-----------|-------------------|---------------|-------------|------------------------------------|---------------|
|                          |      | Participation | Attrition | Prognostic Factor | Outcome       | Confounding | Statistical analysis and reporting |               |
| <i>Aguilera, et al</i>   | 2015 | low           | low       | low               | low           | moderate    | low                                | low           |
| <i>Alvim, et al.</i>     | 2019 | low           | low       | low               | low           | low         | low                                | Low           |
| <i>Bramhecha, et al.</i> | 2019 | low           | moderate  | low               | low           | low         | low                                | Low           |
| <i>Bruce, et al.</i>     | 2016 | low           | moderate  | low               | low           | low         | low                                | Low           |
| <i>Francini, et al.</i>  | 2018 | low           | low       | low               | low           | low         | moderate                           | Low           |
| <i>Hamada, et al.</i>    | 2016 | low           | low       | low               | moderate      | low         | low                                | low           |
| <i>Hashimoto, et al.</i> | 2020 | low           | low       | low               | low           | low         | low                                | Low           |
| <i>Hung, et al.</i>      | 2017 | moderate      | low       | low               | low           | low         | low                                | Low           |

|                           |      |          |          |          |     |          |     |     |
|---------------------------|------|----------|----------|----------|-----|----------|-----|-----|
| <i>Kato, et al.</i>       | 2018 | low      | moderate | low      | low | low      | low | Low |
| <i>Kluth, et al.</i>      | 2014 | low      | moderate | low      | low | low      | low | Low |
| <i>Lara, et al.</i>       | 2014 | low      | low      | low      | low | moderate | low | Low |
| <i>Lee, et al.</i>        | 2016 | low      | moderate | low      | low | low      | low | Low |
| <i>Levesque, et al.</i>   | 2019 | low      | moderate | low      | low | low      | low | Low |
| <i>Lin, et al.</i>        | 2017 | low      | moderate | low      | low | low      | low | Low |
| <i>Loffeler, et al.</i>   | 2015 | low      | low      | low      | low | low      | low | Low |
| <i>Narang, et al.</i>     | 2017 | low      | moderate | low      | low | low      | low | Low |
| <i>Ozden, et al.</i>      | 2017 | moderate | low      | low      | low | low      | low | Low |
| <i>Pei, et al.</i>        | 2016 | low      | low      | moderate | low | low      | low | Low |
| <i>Qu, et al.</i>         | 2016 | low      | low      | low      | low | low      | low | Low |
| <i>Qu F, et al.</i>       | 2017 | low      | low      | low      | low | low      | low | Low |
| <i>Rizzardi, et al.</i>   | 2015 | low      | low      | low      | low | low      | low | low |
| <i>Ruenauver, et al.</i>  | 2014 | low      | moderate | moderate | low | low      | low | Low |
| <i>Shimodaira ,et al.</i> | 2020 | low      | moderate | low      | low | low      | low | Low |
| <i>Strand, et al.</i>     | 2015 | low      | moderate | low      | low | low      | low | Low |
| <i>Takagi, et al.</i>     | 2017 | low      | low      | low      | low | moderate | low | Low |
| <i>Wang, et al.</i>       | 2016 | low      | moderate | low      | low | low      | low | Low |
| <i>Zacho, et al.</i>      | 2017 | moderate | low      | low      | low | moderate | low | Low |
| <i>Berg, et al.</i>       | 2014 | low      | low      | low      | low | low      | low | Low |

Table 7: Overall judgment of RoB (PROBAST, Prognostic)

| Overall judgement of RoB | RoB | Applicability |
|--------------------------|-----|---------------|
| Low                      | 3   | 15            |
| High                     | 27  | 20            |
| Unclear                  | 13  | 8             |
| Total                    | 43  |               |

Table 8: Characteristics of DPFs with overall low risk of bias

| Author                                  | Year | RoB              | Population           | Study design        | Timing                 | Index                                                                                                                    | Outcomes                                              |
|-----------------------------------------|------|------------------|----------------------|---------------------|------------------------|--------------------------------------------------------------------------------------------------------------------------|-------------------------------------------------------|
| <i>Palsdottir, et al.</i> <sup>26</sup> | 2019 | Diag.<br>PROBAST | Localised PCa        | Observational study | Pre treatment          | S3M-MRI (Stockholm3 + PI-RADS)                                                                                           | csPCa diagnosis                                       |
| <i>Guinney, et al.</i> <sup>24</sup>    | 2017 | Prog.<br>PROBAST | mCRPC                | RCT                 | post treatment         | ePCR model                                                                                                               | OS                                                    |
| <i>Joniau, et al.</i> <sup>25</sup>     | 2017 | Prog.<br>PROBAST | Locally advanced PCa | Observational study | Post-treatment         | Gleason score + PSA                                                                                                      | Adverse pathological features at RP; LNI              |
| <i>Hagiwara, et al.</i> <sup>22</sup>   | 2017 | QUADAS           | Localised PCa        | Observational study | Pre-treatment          | WFA-reactive glycan-carrying PSA-Gi                                                                                      | PCa diagnosis, PSA-free survival                      |
| <i>Kelly, et al.</i> <sup>23</sup>      | 2015 | QUADAS           | Localised PCa        | Observational study | Pre-treatment          | miR-141, -145, -155, let7a                                                                                               | PCa diagnosis                                         |
| <i>Aguilera, et al.</i> <sup>27</sup>   | 2015 | QUIPS            | High risk PCa        | Observational study | pre and post treatment | Age, rectal examination, PSA, biopsy Gleason score, uni/bilateral tumor, affected cylinder percentage) and postoperative | BCR                                                   |
| <i>Alvim, et al.</i> <sup>29</sup>      | 2019 | QUIPS            | Metastatic PCa       | Observational study | Post-treatment         | PSA response (PSA reduction $\geq$ 50%)                                                                                  | OS, PFS                                               |
| <i>Bramhecha, et al.</i> <sup>28</sup>  | 2019 | QUIPS            | Localised PCa        | Observational study | Post-treatment         | PTEN deletion                                                                                                            | BCR                                                   |
| <i>Bruce, et al.</i> <sup>30</sup>      | 2016 | QUIPS            | Localised PCa        | Observational study | Post-treatment         | AZGP1 expression                                                                                                         | BR-free survival, CR-free survival, PC-specific death |
| <i>Francini, et al.</i> <sup>31</sup>   | 2018 | QUIPS            | mHSPC                | Observational study | Post-treatment         | Volume                                                                                                                   | OS, time to CRPC                                      |
| <i>Hamada, et al.</i> <sup>32</sup>     | 2016 | QUIPS            | High risk PCa        | Observational study | Post-treatment         | PSA, PSA density (PSAD), PSA density of the transition zone, percentage of positive cores (PPC), prostate volume,        | BCR                                                   |



|                                        |      |                 |               |                     |                |                                                                                                                                                                                                                 |                                                                 |
|----------------------------------------|------|-----------------|---------------|---------------------|----------------|-----------------------------------------------------------------------------------------------------------------------------------------------------------------------------------------------------------------|-----------------------------------------------------------------|
|                                        |      |                 |               |                     |                | TZ volume, Gleason score, PPC from the dominant side                                                                                                                                                            |                                                                 |
| <i>Hashimoto, et al.</i> <sup>33</sup> | 2020 | QUIPS           | Localised PCa | Observational study | Post-treatment | micro-lymphatic invasion, Gleason                                                                                                                                                                               | BCR                                                             |
| <i>Hung, et al.</i> <sup>61</sup>      | 2017 | QUIPS           | mCRPC         | Observational study | Post-treatment | Neurovascular bundle preservation, blood loss, pT stage, pN stage, pGS, PNI, angiolymphatic invasion, tumour amount in specimen, ECE, PSM, SVI, Bladder neck invasion, Foley duration, Post-op undetectable PSA | BCR                                                             |
| <i>Kato et al.</i> <sup>34</sup>       | 2018 | QUIPS           | High risk PCa | Observational study | Post-treatment | LC/IDC                                                                                                                                                                                                          | Progression-free survival (PFS), Cancer-specific survival (CSS) |
| <i>Kluth, et al.</i> <sup>35</sup>     | 2014 | QUIPS           | Localised PCa | Observational study | Post-treatment | number of lymph nodes                                                                                                                                                                                           | BCR                                                             |
| <i>Lara, et al.</i> <sup>36</sup>      | 2014 | QUIPS Validated | mCRPC         | RCT                 | Post treatment | Bone resorption and formation                                                                                                                                                                                   | OS                                                              |
| <i>Lee, et al.</i> <sup>37</sup>       | 2016 | QUIPS           | Localised PCa | Observational study | Post treatment | Positive surgical margin status and bilateral seminal vesicle invasion                                                                                                                                          | BCR                                                             |
| <i>Lévesque, et al.</i> <sup>38</sup>  | 2019 | QUIPS           | Localised PCa | Observational study | Post treatment | UGT2B17 expression                                                                                                                                                                                              | BCR                                                             |
| <i>Lin, et al.</i> <sup>39</sup>       | 2017 | QUIPS           | Localised PCa | Observational study | Post treatment | Aberrant Promoter Methylation of Protocadherin8 (PCDH8)                                                                                                                                                         | BRC-free survival                                               |
| <i>Löffeler, et al.</i> <sup>40</sup>  | 2015 | QUIPS           | mCRPC         | Observational study | Anytime        | PSA doubling time, PSA nadir during ADT, hemoglobin and alkaline phosphatase levels at CRPC                                                                                                                     | OS                                                              |
| <i>Narang, et al.</i> <sup>41</sup>    | 2017 | QUIPS           | Localised PCa | Observational study | Anytime        | PSA: End-of-radiation PSA                                                                                                                                                                                       | BCR-free survival, MFS, CSS, OS                                 |

|                                         |      |                 |                           |                     |                          |                                                             |                                                                                                       |
|-----------------------------------------|------|-----------------|---------------------------|---------------------|--------------------------|-------------------------------------------------------------|-------------------------------------------------------------------------------------------------------|
| <i>Ozden, et al.</i> <sup>42</sup>      | 2017 | QUIPS           | Localised PCa             | Observational study | Post treatment           | Age                                                         | RRP specimen, BCR, and biochemical recurrence-free survival rates                                     |
| <i>Pei, et al.</i> <sup>43</sup>        | 2016 | QUIPS           | CRPC                      | Observational study | Pre and during treatment | Neutrophil-to-lymphocyte ratio                              | OS, PFS                                                                                               |
| <i>Qu, et al.</i> <sup>44</sup>         | 2016 | QUIPS           | mPCa and CRPC             | Observational study | Pre treatment            | AR-V7                                                       | Time to CRPC / CRPC: CSS                                                                              |
| <i>Qu, et al.</i> <sup>45</sup>         | 2017 | QUIPS           | PCa                       | Observational study | Pre and during treatment | AR-V7                                                       | OS                                                                                                    |
| <i>Ruenauver, et al.</i> <sup>46</sup>  | 2014 | QUIPS           | Localised PCa             | Observational study | Post treatment           | YWHAZ                                                       | OS                                                                                                    |
| <i>Shimodaira, et al.</i> <sup>47</sup> | 2020 | QUIPS           | Metastatic PCa            | Observational study | Post treatment           | Value of Platelet Counts                                    | Disease specific survival                                                                             |
| <i>Strand, et al.</i> <sup>48</sup>     | 2015 | QUIPS           | Localised PCa             | Observational study | Post treatment           | 5-hydroxymethylcytosine (5hmC) score                        | BCR                                                                                                   |
| <i>Takagi, et al.</i> <sup>49</sup>     | 2017 | QUIPS           | Localised PCa             | Observational study | Post treatment           | Age, T stage, % of pos cores, Gleason score, PSA, Total ADT | BCR-free survival                                                                                     |
| <i>Wang, et al.</i> <sup>50</sup>       | 2016 | QUIPS           | PCa                       | Observational study | Post treatment           | Platelet to lymphocyte ratio                                | PLR with progression-free survival (PFS), cancer-specific survival (CSS) and overall survival (OS)n/a |
| <i>Zacho, et al.</i> <sup>51</sup>      | 2017 | QUIPS           | Localised PCa             | Observational study | Anytime                  | Bone scan index                                             | Time to CRPC                                                                                          |
| <i>Berg, et al.</i> <sup>52</sup>       | 2014 | QUIPS validated | Under Active Surveillance | Observational study | During treatment         | ERG immunohisto-chemical staining                           | Overall AS progression, histopathologic progression                                                   |

1  
2  
3  
4  
5  
6  
7  
8  
9  
10  
11  
12  
13  
14  
15  
16  
17  
18  
19  
20  
21  
22  
23  
24  
25  
26  
27  
28  
29  
30  
31  
32  
33  
34  
35  
36  
37  
38  
39  
40  
41  
42  
43  
44  
45  
46

**Figure 1:** Overview of four stage process

**Figure 2:** PRISMA flow diagram

For peer review only

**Figure 1:** Overview of four stage process

| Workflow   | Task                                                                                                                                                                                                                                                                                                                                                                                                                                                                                                                                                                                                                                                                                                                                                                                                                                                                                                                                                                                                   |
|------------|--------------------------------------------------------------------------------------------------------------------------------------------------------------------------------------------------------------------------------------------------------------------------------------------------------------------------------------------------------------------------------------------------------------------------------------------------------------------------------------------------------------------------------------------------------------------------------------------------------------------------------------------------------------------------------------------------------------------------------------------------------------------------------------------------------------------------------------------------------------------------------------------------------------------------------------------------------------------------------------------------------|
| Stage 1.   | Broad literature-based systematic review of diagnostic and prognostic factors (DPs) for all stages of prostate cancer from 2014 onwards (English only; humans). <ul style="list-style-type: none"> <li>Extract data from the included studies following the CHARMS-PF guideline.</li> </ul>                                                                                                                                                                                                                                                                                                                                                                                                                                                                                                                                                                                                                                                                                                            |
| Stage 2.   | Discussion of systematic review findings by a multidisciplinary expert panel <ul style="list-style-type: none"> <li>Review the list of included studies</li> </ul>                                                                                                                                                                                                                                                                                                                                                                                                                                                                                                                                                                                                                                                                                                                                                                                                                                     |
| Stage 3.   | Risk of Bias Assessment and applicability of individual studies using PROBAST, QUIPS and QUADAS-2                                                                                                                                                                                                                                                                                                                                                                                                                                                                                                                                                                                                                                                                                                                                                                                                                                                                                                      |
| Stage 4.   | Quantitative assessment of individual articles using meta-analytic techniques: <ul style="list-style-type: none"> <li>If PROBAST indicates low risk of bias and low concerns for applicability: Oxford Classification Centre for Evidence Based Medicine: <ol style="list-style-type: none"> <li>If there is Level 1a (SR of RCTs), we do not do a meta-analysis</li> <li>No Level 1a but &gt;2 RCTs, we do a meta-analysis</li> <li>No Level 1a/b, i.e. if at least two RCTs are now available, and systematic review of RCT evidence is not possible, we will identify whether there is a systematic review for observational studies (real world evidence; RWE), we do not do a meta-analysis</li> <li>If systematic review of RWE is not available, a systematic review of observational study will be conducted, and a meta-analysis will be performed if at least two RWEs studies are available and data pooling is feasible and there are low concerns of risk of bias.</li> </ol> </li> </ul> |
| Final aim: | Develop online PIONEER Online Search Tool for DPFs                                                                                                                                                                                                                                                                                                                                                                                                                                                                                                                                                                                                                                                                                                                                                                                                                                                                                                                                                     |

Figure 2: PRISMA flow diagram

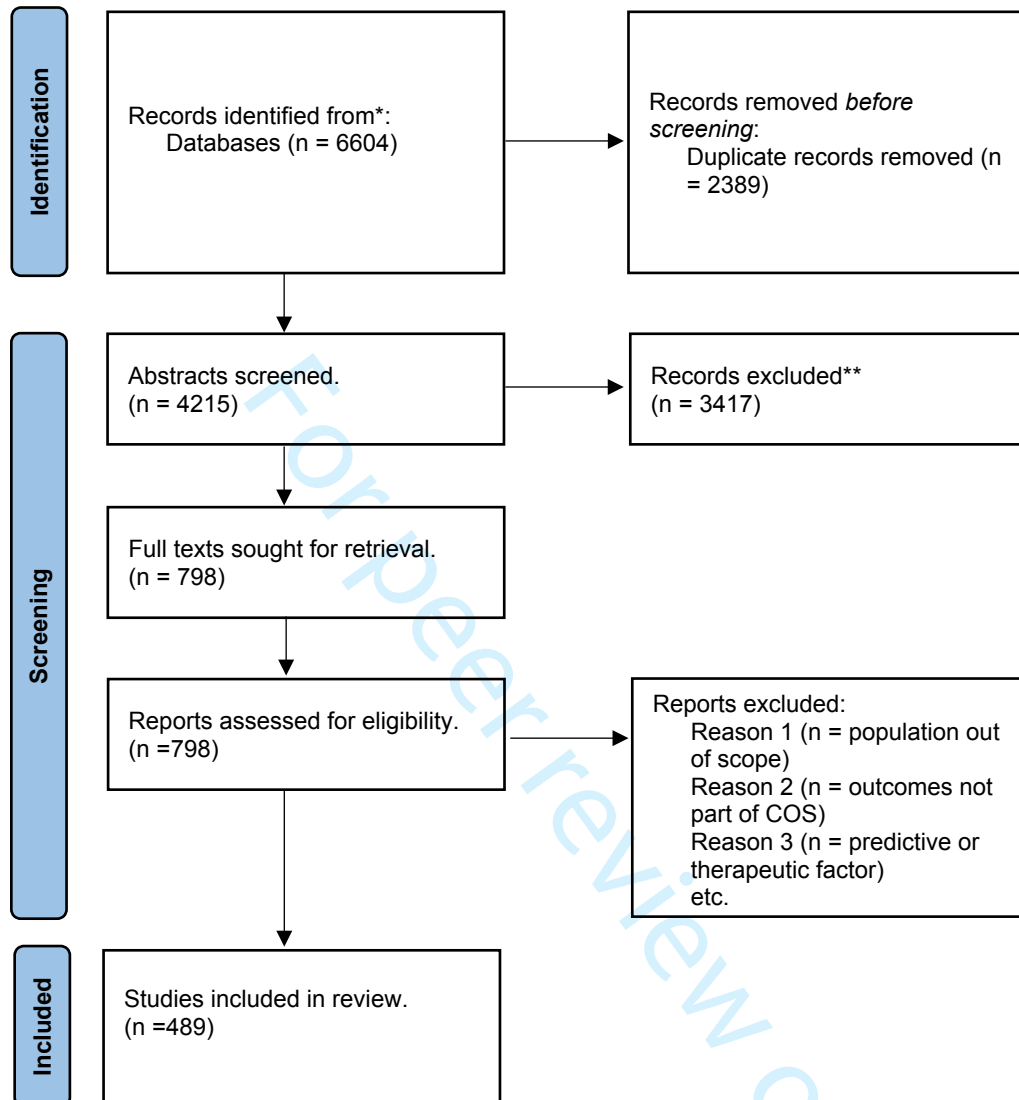

1  
2  
3  
4  
5  
6  
7  
8  
9  
10  
11  
12  
13  
14  
15  
16  
17  
18  
19  
20  
21  
22  
23  
24  
25  
26  
27  
28  
29  
30  
31  
32  
33  
34  
35  
36  
37  
38  
39  
40  
41  
42  
43  
44  
45  
46  
47  
48  
49  
50  
51  
52  
53  
54  
55  
56  
57  
58  
59  
60

**Supplementary material Table 1: Search strategy**

Database: OVID Medline Epub Ahead of Print, In-Process & Other Non-Indexed Citations, Ovid MEDLINE(R) Daily and Ovid MEDLINE(R) 1946 to Present, Embase <1974 to 2020 January 28>, EBM Reviews - Cochrane Database of Systematic Reviews <2005 to January 21, 2020>

Search Strategy:

- 
- 1 exp \*Prostatic Neoplasms/ (262435)
  - 2 exp \*prostate cancer/ (245472)
  - 3 (prostat\* adj2 (cancer\* or carcinoma\* or malignan\* or tumor\* or tumour\* or neoplas\* or adenocarcinoma\* or adenoma\*)).tw. (332251)
  - 4 or/1-3 (366427)
  - 5 ((diagnostic or prognos\* or predict\*) adj10 (biomarker or biomarkers or factor or factors)).tw,kw. (717487)
  - 6 ((diagnostic or prognos\* or predict\*) adj10 (Oncotype Dx Prostate or Prolaris or Decipher or Decipher PORTOS or ProMark)).tw,kw. (458)
  - 7 5 or 6 (717869)
  - 8 4 and 7 (17456)
  - 9 limit 8 to english language [Limit not valid in CDSR; records were retained] (16484)
  - 10 limit 9 to yr="2014 -Current" (8417)
  - 11 conference abstract.pt. or Congresses as Topic/ or Conference Review.pt. or "Journal: Conference Abstract".pt. (3815712)
  - 12 10 not 11 (5902)
  - 13 (exp animals/ or exp animal/ or exp nonhuman/ or exp animal experiment/ or animal model/ or animal tissue/ or non human/ or (rat or rats or mice or mouse or swine or porcine or murine or sheep or lambs or pigs or piglets or rabbit or rabbits or cat or cats or dog or dogs or cattle or bovine or monkey or monkeys or trout or marmoset\$1).ti.) not (humans/ or human/ or human experiment/ or (human\* or men or women or patients or subjects).tw.) (10251935)
  - 14 12 not 13 (5882)
  - 15 note/ or editorial/ or letter/ or Comment/ or news/ or (note or editorial or letter or Comment or news).pt. (4565255)
  - 16 14 not 15 (5811)
  - 17 (child/ or Pediatrics/ or Adolescent/ or Infant/ or adolescence/ or newborn/ or (baby or babies or child or children or pediatric\* or paediatric\* or peadiatric\* or infant\* or infancy or neonat\* or

1  
2  
3 newborn\* or new born\* or adolescen\* or preschool or pre-school or toddler\*).tw.) not (adult/ or  
4 aged/ or (aged or adult\* or elder\* or senior\* or men or women).tw.) (4146377)

5  
6  
7 18 16 not 17 (5794)

8 19 18 use ppez,oemez (5788)

9  
10 20 10 use coch (6)

11 21 19 or 20 (5794)

12  
13 22 remove duplicates from 21 (3140)  
14  
15  
16  
17  
18  
19  
20  
21  
22  
23  
24  
25  
26  
27  
28  
29  
30  
31  
32  
33  
34  
35  
36  
37  
38  
39  
40  
41  
42  
43  
44  
45  
46  
47  
48  
49  
50  
51  
52  
53  
54  
55  
56  
57  
58  
59  
60

For peer review only

Supplementary material Table 2. Multidisciplinary expert meeting

| <b>Profession</b>                    | <b>Attendance</b> |
|--------------------------------------|-------------------|
| Urologist                            | Accepted          |
| Epidemiologist                       | Accepted          |
| Urologist                            | Accepted          |
| Epidemiologist/Pharma representative | Accepted          |
| Pathologist                          | Accepted          |
| Urologist                            | Accepted          |
| Urologist                            | Accepted          |
| Epidemiologist                       | Accepted          |
| Methodologist                        | Accepted          |
| Epidemiologist/Pharma representative | Accepted          |
| Urologist                            | Accepted          |
| Urologist/Methodologist              | Accepted          |
| Urologist                            | Accepted          |
| Urologist                            | Accepted          |
| Oncologist                           | Accepted          |
| Pharma representative                | Accepted          |
| Pharma representative                | Accepted          |
| Statistician/ Pharma representative  | Accepted          |



Table 3: PROBAST overall assessment

| Criteria                                                  | Reaching and overall judgement of RoB                       |                                                                                     |
|-----------------------------------------------------------|-------------------------------------------------------------|-------------------------------------------------------------------------------------|
| All domains are rated low risk.                           | Paper was classified as low RoB and low Applicability.      |  |
| One or more domain was judged to be high risk of bias.    | Paper was classified as high RoB and high Applicability.    |  |
| One or more domain was judged to be unclear risk of bias. | Paper was classified as unclear RoB and high Applicability. |  |

For peer review only

Supplementary material Table 4: QUIPS scoring

| Score of 6 domains                                                                | Overall RoB                                 |        |
|-----------------------------------------------------------------------------------|---------------------------------------------|--------|
| All domains were classified as having low RoB, or up to one moderate RoB.         | Paper was classified as low RoB             | Green  |
| One or more domains were classified as having high RoB, or $\geq 3$ moderate RoB. | Paper was classified as high RoB            | Red    |
| All papers in between.                                                            | Paper was classified as having moderate RoB | Yellow |

For peer review only

# BMJ Open

## Diagnostic and prognostic factors in patients with prostate cancer: a systematic review

|                               |                                                                                                                                                                                                                                                                                                                                                                                                                                                                                                                                                                                                                                                                                                                                                                                                                                                                                                                                                                                                                                                                                                                                                                                                                                                                                                                                                                                                                                                                                                                                                                                                                                                                                                                                                                                                                                                                                                                                                                                                                                                                                                      |
|-------------------------------|------------------------------------------------------------------------------------------------------------------------------------------------------------------------------------------------------------------------------------------------------------------------------------------------------------------------------------------------------------------------------------------------------------------------------------------------------------------------------------------------------------------------------------------------------------------------------------------------------------------------------------------------------------------------------------------------------------------------------------------------------------------------------------------------------------------------------------------------------------------------------------------------------------------------------------------------------------------------------------------------------------------------------------------------------------------------------------------------------------------------------------------------------------------------------------------------------------------------------------------------------------------------------------------------------------------------------------------------------------------------------------------------------------------------------------------------------------------------------------------------------------------------------------------------------------------------------------------------------------------------------------------------------------------------------------------------------------------------------------------------------------------------------------------------------------------------------------------------------------------------------------------------------------------------------------------------------------------------------------------------------------------------------------------------------------------------------------------------------|
| Journal:                      | <i>BMJ Open</i>                                                                                                                                                                                                                                                                                                                                                                                                                                                                                                                                                                                                                                                                                                                                                                                                                                                                                                                                                                                                                                                                                                                                                                                                                                                                                                                                                                                                                                                                                                                                                                                                                                                                                                                                                                                                                                                                                                                                                                                                                                                                                      |
| Manuscript ID                 | bmjopen-2021-058267.R1                                                                                                                                                                                                                                                                                                                                                                                                                                                                                                                                                                                                                                                                                                                                                                                                                                                                                                                                                                                                                                                                                                                                                                                                                                                                                                                                                                                                                                                                                                                                                                                                                                                                                                                                                                                                                                                                                                                                                                                                                                                                               |
| Article Type:                 | Original research                                                                                                                                                                                                                                                                                                                                                                                                                                                                                                                                                                                                                                                                                                                                                                                                                                                                                                                                                                                                                                                                                                                                                                                                                                                                                                                                                                                                                                                                                                                                                                                                                                                                                                                                                                                                                                                                                                                                                                                                                                                                                    |
| Date Submitted by the Author: | 06-Jan-2022                                                                                                                                                                                                                                                                                                                                                                                                                                                                                                                                                                                                                                                                                                                                                                                                                                                                                                                                                                                                                                                                                                                                                                                                                                                                                                                                                                                                                                                                                                                                                                                                                                                                                                                                                                                                                                                                                                                                                                                                                                                                                          |
| Complete List of Authors:     | <p>Beyer, Katharina; King's College London, Translational and Oncology Research (TOUR)<br/> Moris, Lisa; KU Leuven University Hospitals Leuven, Department of Urology<br/> Lardas, Michael; Metropolitan Hospital Athens, Department of Urology<br/> Haire, Anna ; King's College London, TOUR<br/> Barletta, Francesco; IRCCS Ospedale San Raffaele, Unit of Urology/Division of Oncology, URI<br/> Scuderi, Simone; IRCCS Ospedale San Raffaele, Unit of Urology/Division of Oncology, URI<br/> Molnar, Megan; Bayer AG<br/> Herrera, Ronald; Bayer AG<br/> Rauf, Abdul; Mid Cheshire Hospitals NHS Foundation Trust, Department of Urology<br/> Campi, Riccardo; Universita degli Studi di Firenze<br/> Greco, Isabella; University of Florence, Department of Minimally Invasive and Robotic Urologic Surgery and Kidney Transplantation<br/> Shiranov, Kirill; CDC "Zdorovie "<br/> Dabestani, Saeed; Lund University, Dept. of Translational Medicine<br/> van den Broeck, Thomas; University hospital leuven, Department of Urology<br/> Gacci, Mauro; University of Florence, Department of Minimally Invasive and Robotic Urologic Surgery and Kidney Transplantation<br/> Gandaglia, Giorgio; IRCCS Ospedale San Raffaele, Unit of Urology/Division of Oncology<br/> Omar, Muhammad; University of Aberdeen, Academic Urology Unit/ Cochrane Incontinence Group<br/> MacLennan, Steven; University of Aberdeen<br/> Roobol, Monique J.; Erasmus University Medical Center, Department of Urology<br/> Farahmand, Bahman; Bayer AG<br/> Vradi, Eleni; Bayer AG, Department of Epidemiology<br/> Devecseri, Zsuzsanna; Sanofi SA<br/> Asiimwe, Alex; Bayer Pharma AG, Medical Affairs and PV<br/> Zong, Jihong; Bayer U.S. , Epidemiology<br/> MacLennan, Sara; University of Aberdeen, Academic Urology Unit<br/> Collette, Laurence; EORTC Headquarters<br/> NDow, James; University of Aberdeen, Surgery<br/> Briganti , A; Vita-Salute University San Raffaele<br/> Bjartell, Anders; Skåne University Hospital<br/> Van Hemelrijck, Mieke; King's College London, Translational and</p> |

1  
2  
3  
4  
5  
6  
7  
8  
9  
10  
11  
12  
13  
14  
15  
16  
17  
18  
19  
20  
21  
22  
23  
24  
25  
26  
27  
28  
29  
30  
31  
32  
33  
34  
35  
36  
37  
38  
39  
40  
41  
42  
43  
44  
45  
46  
47  
48  
49  
50  
51  
52  
53  
54  
55  
56  
57  
58  
59  
60

|                                    |                                                                                    |
|------------------------------------|------------------------------------------------------------------------------------|
|                                    | Oncology Research (TOUR)                                                           |
| <b>Primary Subject Heading</b> :   | Urology                                                                            |
| <b>Secondary Subject Heading</b> : | Urology                                                                            |
| <b>Keywords</b> :                  | Prostate disease < UROLOGY, Urological tumours < ONCOLOGY, Epidemiology < ONCOLOGY |
|                                    |                                                                                    |

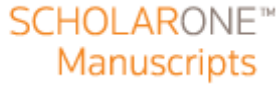

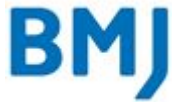

I, the Submitting Author has the right to grant and does grant on behalf of all authors of the Work (as defined in the below author licence), an exclusive licence and/or a non-exclusive licence for contributions from authors who are: i) UK Crown employees; ii) where BMJ has agreed a CC-BY licence shall apply, and/or iii) in accordance with the terms applicable for US Federal Government officers or employees acting as part of their official duties; on a worldwide, perpetual, irrevocable, royalty-free basis to BMJ Publishing Group Ltd ("BMJ") its licensees and where the relevant Journal is co-owned by BMJ to the co-owners of the Journal, to publish the Work in this journal and any other BMJ products and to exploit all rights, as set out in our [licence](#).

The Submitting Author accepts and understands that any supply made under these terms is made by BMJ to the Submitting Author unless you are acting as an employee on behalf of your employer or a postgraduate student of an affiliated institution which is paying any applicable article publishing charge ("APC") for Open Access articles. Where the Submitting Author wishes to make the Work available on an Open Access basis (and intends to pay the relevant APC), the terms of reuse of such Open Access shall be governed by a Creative Commons licence – details of these licences and which [Creative Commons](#) licence will apply to this Work are set out in our licence referred to above.

Other than as permitted in any relevant BMJ Author's Self Archiving Policies, I confirm this Work has not been accepted for publication elsewhere, is not being considered for publication elsewhere and does not duplicate material already published. I confirm all authors consent to publication of this Work and authorise the granting of this licence.

## Diagnostic and prognostic factors in patients with prostate cancer: a systematic review

### Author list:

Katharina Beyer<sup>a\*</sup>; Lisa Moris<sup>b\*</sup>; Michael Lardas<sup>c\*</sup>; Anna Haire<sup>a</sup>; Francesco Barletta<sup>d</sup>; Simone Scuderi<sup>d</sup>; Megan Molnar<sup>e</sup>; Ronald Herrera<sup>e</sup>; Abdul Rauff; Riccardo Campi<sup>g</sup>; Isabella Greco<sup>g</sup>; Kirill Shiranov<sup>h</sup>; Saeed Dabestani<sup>i</sup>; Thomas van den Broeck<sup>b</sup>; Mauro Gacci<sup>g</sup>; Giorgio Gandaglia<sup>d</sup>; Muhammad Imran Omar<sup>i</sup>; Steven MacLennan<sup>j</sup>; Monique J. Roobol<sup>k</sup>; Bahman Farahmand<sup>l</sup>; Eleni Vradi<sup>e</sup>; Zsuzsanna Devecseri<sup>m</sup>; Alex Asiimwe<sup>e</sup>; Jihong Zong<sup>n</sup>; Sara J MacLennan<sup>j</sup>; Laurence Collette<sup>o</sup>; James N'Dow<sup>l</sup>; Alberto Briganti<sup>d</sup>; Anders Bjartell<sup>a</sup>; Mieke Van Hemelrijck<sup>a\*</sup> and the PIONEER Consortium

\*Authors share first authorship

### Corresponding author:

Katharina Beyer,  
Translational Oncology and Urology Research (TOUR),  
School of Cancer and Pharmaceutical Studies,  
3rd Floor, Bermondsey Wing, Guy's Hospital, Great Maze  
Pond,  
London SE1 9RT,  
02071885594  
[katharina.beyer@kcl.ac.uk](mailto:katharina.beyer@kcl.ac.uk)

### Affiliations:

<sup>a</sup> Translational and Oncology Research (TOUR), King's College London, Faculty of Life Sciences and Medicine, London, UK

<sup>b</sup> Department of Urology, University Hospitals Leuven, Leuven, Belgium

<sup>c</sup> Department of Urology, Metropolitan general, Athens, Greece

<sup>d</sup> Unit of Urology/Division of Oncology, URI, IRCCS Ospedale San Raffaele, Milan, Italy

<sup>e</sup> Department of Epidemiology, Bayer AG, Berlin, Germany

<sup>f</sup> Department of Urology, Mid Cheshire Hospitals, NHS Foundation Trust, Crewe CW1 4QJ, United Kingdom

<sup>g</sup> Department of Minimally Invasive and Robotic Urologic Surgery and Kidney Transplantation, University of Florence, Florence, Italy

<sup>h</sup> CDC "Zdorovie", Rostov-on-Don, Russia

<sup>l</sup> Dept. of Translational Medicine, Division of Urological Cancers, Lund University, Kristianstad Central Hospital, Malmo, Sweden.

<sup>j</sup> Academic Urology Unit, University of Aberdeen, Aberdeen, UK

<sup>k</sup> Department of Urology, Erasmus University Medical Center, Rotterdam, The Netherlands

<sup>l</sup> Global Epidemiology, Bayer AB, Stockholm, Sweden

<sup>m</sup> Sanofi, France

<sup>n</sup> Global Medical Affairs Oncology, Real World Evidence, Bayer HealthCare Pharmaceuticals Inc., Whippany, New Jersey, USA

<sup>o</sup> EORTC Headquarters, Brussels, Belgium

<sup>p</sup> Department of Urology, University Vita e Salute-San Raffaele, Milan, Italy

<sup>q</sup> Department of Translational Medicine, Lund University, Malmö, Sweden

**Word count of text:** 3305

**Word count of the abstract:** 380

**Key words:** Prostate cancer, diagnostic factor, prognostic factors, big data, RWE

**Email addresses co-authors:**

lisa.moris1506@gmail.com<sup>b</sup>; lardamk@gmail.com<sup>c</sup>; anna.haire@kcl.ac.uk<sup>a</sup>;  
Barletta.Francesco@hsr.it<sup>d</sup>; Scuderi.Simone@hsr.it<sup>d</sup>; megan.molnar@bayer.com<sup>e</sup>;  
ronald.herrera@bayer.com<sup>e</sup>; dr.rauf82@gmail.com<sup>f</sup>; riccardo.campi@gmail.com<sup>g</sup>; isabella-  
greco@live.it<sup>g</sup>; urologgg@mail.ru<sup>h</sup>; saeed.dabestani@gmail.com<sup>i</sup>;  
vandenbroeck.thomas@gmail.com<sup>b</sup>; asujenthiran@doctors.net.uk<sup>j</sup>; maurogacci@yahoo.it<sup>g</sup>;  
gandaglia.giorgio@hsr.it<sup>d</sup>; m.i.omar@abdn.ac.uk<sup>k</sup>; steven.maclennan@abdn.ac.uk<sup>k</sup>;  
m.roobol@erasmusmc.nl<sup>l</sup>; bahman.farahmand@bayer.com<sup>m</sup>; eleni.vradi@bayer.com<sup>e</sup>;  
Zsuzsanna.Devecseri@sanofi.com<sup>n</sup>; alex.asiimwe@bayer.com<sup>e</sup>; jihong.zong@bayer.com<sup>o</sup>;  
s.maclennan@abdn.ac.uk<sup>k</sup>; Laurence.collette@iddi.com<sup>p</sup>; j.ndow@abdn.ac.uk<sup>l</sup>;  
briganti.alberto@hsr.it<sup>d</sup>; anders.bjartell@med.lu.se<sup>r</sup>; mieke.vanhemelrijck@kcl.ac.uk<sup>a</sup>

## Abstract

**Objectives:** As part of the PIONEER Consortium objectives, we have explored which diagnostic and prognostic factors (DPFs) are available in relation to our previously defined clinician and patient-reported outcomes (PROs) for prostate cancer (PCa).

**Design:** We performed a systematic review to identify validated and non-validated studies.

**Data sources:** MEDLINE, Embase and the Cochrane Library were searched on January 21, 2020.

**Eligibility criteria:** Only quantitative studies were included. Single studies with fewer than 50 participants, published before 2014 and looking at outcomes which are not prioritised in the PIONEER core outcome set will be excluded.

**Data extraction and synthesis:** After initial screening, we extracted data following the Checklist for Critical Appraisal and Data Extraction for Systematic Reviews of prognostic factor studies (CHARMS-PF) criteria and discussed the identified factors with a multidisciplinary expert group. The quality of the included papers was scored for applicability and risk of bias using validated tools such as PROBAST, QUIPS and QUADAS-2.

**Results:** The search identified 6,604 studies, from which 489 DPFs were included. Sixty-four of those were internally or externally validated. However, only three studies on diagnostic and seven studies on prognostic factors had a low risk of bias and a low risk concerning applicability.

**Conclusion:** Most of the DPFs identified require additional evaluation and validation in properly designed studies before they can be recommended for use in clinical practice. The PIONEER online search tool for diagnostic and prognostic factors for prostate cancer will



1  
2  
3 enable researchers to understand the quality of the current research and help them design  
4  
5 future studies.  
6  
7

8 **Ethics and Dissemination:** There are no ethical implications.  
9  
10  
11  
12  
13  
14  
15  
16  
17  
18  
19  
20  
21  
22  
23  
24  
25  
26  
27  
28  
29  
30  
31  
32  
33  
34  
35  
36  
37  
38  
39  
40  
41  
42  
43  
44  
45  
46  
47  
48  
49  
50  
51  
52  
53  
54  
55  
56  
57  
58  
59  
60

For peer review only

## Introduction

Prostate cancer (PCa) accounts for 15% of cancers diagnosed<sup>1</sup> and is the second most common cancer in males worldwide<sup>2</sup>. PCa is clinically and molecularly heterogeneous and is usually suspected based upon the clinical findings of digital rectal examination (DRE) and/or Prostate Specific Antigen (PSA) levels<sup>1</sup>. However, which diagnostic or prognostic factor (DPF) can be used to select patients for specific therapeutic options remains largely unclear<sup>3</sup>. Specific biomarkers in urine or in blood are available on top of traditional PSA testing, such as PCA3, TMPRSS2-ERG fusion, or kallikreins as incorporated in the Phi or 4Kscore test together with other parameters including family history<sup>4-7</sup>. However, the European Association of Urology (EAU) guidelines (2019) currently do not provide general recommendations to implement these biomarkers into routine screening programmes due to limited data<sup>8</sup>. As part of the ASCO guidelines, Eggener et al recommended five commercially available biomarkers which have been shown to provide prognostic significance and additional information beyond standard clinical models in patient selection in the localised context: Oncotype Dx Prostate, Prolaris, Decipher, and ProMark<sup>9</sup>. However, no guidelines have recommended DPFs for other stages of PCa. The expert panel at the APCCC consensus meeting of advanced prostate cancer in Basel 2019, recommended AR-V7 for mCRPC as potentially useful, which ultimately led to the inclusion of AR-V7 testing in the NCCN guidelines<sup>10</sup>.

The PIONEER Consortium is an international collaboration coordinated by the European Association of Urology (EAU), which aims to establish the best evidence-based management and clinical practice of PCa across all disease stages using the power of big data analytics towards a more outcome-driven, value-based, and patient-centric healthcare system<sup>11</sup>. A

1  
2  
3 key objective is to address one of the major challenges within the context of diagnostic or  
4  
5 prognostic biomarkers/factors: the inability to incorporate DPFs into the management of  
6  
7 PCa in terms of screening, diagnosis and treatment. It is therefore important to summarise  
8  
9 and evaluate the evidence. Biomarkers can be classified into different types: diagnostic,  
10  
11 prognostic, predictive, and therapeutic – in this study we focus on the first two<sup>12</sup>. A  
12  
13 diagnostic biomarker or factor is useful when cancer is suspected and allows the early  
14  
15 detection based on symptoms or tests <sup>12</sup>. The overall aim of a diagnostic biomarker is to  
16  
17 distinguish people with the diseases from people without the disease. A prognostic  
18  
19 biomarker or factor is a clinical or biological characteristic which provides information on  
20  
21 the likely course of the disease i.e., biochemical progression or disease recurrence <sup>12</sup>. It  
22  
23 enables clinicians to decide on the most suitable treatment depending on the likely course  
24  
25 of the disease. In the sections below we have used the terms biomarkers and factors  
26  
27 interchangeably. Multiple diagnostic and prognostic factors (DPFs) can be measured in  
28  
29 tissue, blood or urine. These come with different advantages and disadvantages and only a  
30  
31 limited number of factors are currently available for PCa in standard clinical care.  
32  
33  
34  
35  
36  
37  
38  
39  
40  
41  
42  
43  
44  
45  
46  
47  
48  
49

50 We aimed to systematically review the evidence from 2014 onward to assess which DPFs  
51  
52 are available in relation to previously defined outcomes for PCa.  
53  
54  
55  
56  
57  
58  
59  
60

## 50 **Methods**

51 The systematic review followed the PRISMA guidelines <sup>13</sup>. A detailed protocol of the overall  
52  
53 project was published elsewhere <sup>14</sup> (please see the protocol attached as methods appendix).  
54  
55 Briefly, we followed the following four steps (Figure 1):  
56  
57  
58  
59  
60

- 1  
2  
3 (1) Comprehensive systematic literature review of DPFs for all stages of PCa (localised,  
4 locally advanced, metastatic, and non-metastatic castration resistant) from 2014 onwards.  
5  
6 DPFs developed before 2014 were not included, due to the significant changes which  
7  
8 influence the staging of PCa (i.e., Consensus Conference on Gleason Grading of Prostatic  
9  
10 Carcinoma (60)) have taken place in diagnostic and prognostic practice and patient  
11  
12 management.  
13  
14  
15  
16  
17 (2) Assessment and identification of final list of DPFs by a multidisciplinary expert panel.  
18  
19  
20 (3) Evaluation of quality of studies published using risk of bias tools: Prediction model Risk  
21  
22 Of Bias (RoB) Assessment Tool (PROBAST) if applicable; or Quality in Prognostic Studies  
23  
24 (QUIPS) tool for prognostic and the Quality Assessment of Diagnostic Accuracy Studies 2  
25  
26 (QUADAS-2) tool for diagnostic factors;  
27  
28  
29 (4) Due to the heterogeneity of the studies identified no further formal quantitative  
30  
31 assessments in the form of a meta-analyses could be performed. Hence, the findings of  
32  
33 stages 1-3 have been reported here as the results of a systematic review.  
34  
35  
36  
37  
38  
39  
40

#### 41 Stage 1: Comprehensive literature review

42  
43 We developed the search criteria for the first search with an information scientist who  
44  
45 specialises in systematic reviews for urology. MEDLINE, Embase and the Cochrane Library  
46  
47 were searched on January 21, 2020. The second search was developed following a  
48  
49 consultation with an independent information scientist group who excluded row 12, 14 and  
50  
51 16 of Table 1 (see supplementary material). We screened the EAU Guidelines reference list  
52  
53 for PCa in our third search (see Figure 2).  
54  
55  
56  
57  
58  
59  
60

## Stage 2: Multidisciplinary expert meeting

On the 20<sup>th</sup> of March 2020, we invited a group of multidisciplinary participants to discuss the identified articles on DPFs (see supplementary material Table 2). The participants were presented the search criteria and the extracted data. Data extraction followed the CHARMS-PF checklist and we added author and year of publication.

## Stage 3: Evaluation of quality of studies published using the risk of bias tools

Prior to the evaluation of the quality of studies, an initial pilot screening to prepare the raters for the use of PROBAST, QUADAS-2, QUIPS was performed. This aimed to reach consensus on how to judge the domains of the assessments using the three RoB tools. Two urologists (FB, SS) and two epidemiologists (AH, KB) were involved in the pilot assessments. The group discussed any discrepancies. Articles which presented the development and validation the internal validation or the external validation (i.e., the same data was used for both development and internal validation, such as bootstrapping or cross-validation; different populations were used for development and validation), of a diagnostic or prognostic model were assessed with PROBAST. Papers assessing single biomarkers or with/without validation were assessed with QUIPS for prognostic or QUADAS-2 for diagnostic biomarkers.

### *Evaluation of quality of studies published using QUADAS-2*

The RoB of diagnostic factors without validation or single validated factors was evaluated using QUADAS-2. We assessed the following four domains: patient selection, index test, reference standards and flow and timing. The first three domains are assessed looking at applicability and all four domains were assessed in terms of RoB <sup>15</sup>. We created a summative

1  
2  
3 score after the diagnostic studies were assessed by two reviewers and in case of  
4  
5 disagreement a third reviewer assessed the study.  
6  
7  
8  
9

#### 10 *Evaluation of quality of studies published using PROBAST (Diagnostic)*

11  
12 The RoB of internal or external validated diagnostic models was assessed using the PROBAST  
13  
14 RoB tool. PROBAST includes four domains assessing the RoB (i.e., participants, predictors,  
15  
16 outcome and analysis) and four domains assessing applicability (i.e., participants, predictors  
17  
18 and outcome) (see supplementary material Table 3 for scoring information).  
19  
20  
21  
22  
23  
24

#### 25 *Evaluation of quality of studies published using QUIPS*

26  
27 To assess the articles which are single factors or were not internally or externally validated,  
28  
29 we used the QUIPS rating procedure (see supplementary material Table 4 for scoring  
30  
31 information). To standardise the approach across raters, we used the QUIPS electronic  
32  
33 spreadsheet (excel) from Hayden et al<sup>16</sup>. There are no rules available for QUIPS on how to  
34  
35 score the overall RoB of a paper. Due to the large number of papers and the need for  
36  
37 synthesis, we followed Grooten et al's suggestions to categorise on the following criteria: 1)  
38  
39 Paper was classified as low RoB if all domains were classified as having low RoB, or up to  
40  
41 one moderate RoB; 2) Paper was classified as high RoB if one or more domains were  
42  
43 classified as having high RoB, or  $\geq 3$  moderate RoB; 3) Paper was classified as having  
44  
45 moderate RoB if all papers in between 1 or 2 (see table 1). This assessment was based on  
46  
47 the risk scores of individual assessments within the group. If the overall assessment was not  
48  
49 possible due to differences in the individual category, a third assessor reviewed the  
50  
51 assessments and the results were discussed.  
52  
53  
54  
55  
56  
57  
58  
59  
60

### *Evaluation of quality of studies published using PROBAST (Prognostic)*

The RoB of prognostic validated models were assessed using PROBAST. As highlighted above, PROBAST includes four domains assessing the RoB (i.e., participants, predictors, outcome and analysis) and four domains assessing applicability (i.e., participants, predictors and outcome).

## **Results**

### **Stage 1: Comprehensive literature review**

Stage 1 identified 6,604 citations and contained three independent searches. After removing duplicates, we screened 4,215 abstracts, from which 489 met the inclusion criteria.

### **Stage 2: Multidisciplinary expert meeting**

The group discussed the results and additional literature on DPFs was suggested to help the classification of the DPFs, such as the ASCO Guideline on Molecular Biomarkers in Localized Prostate Cancer<sup>17</sup>.

### **Stage 3: Evaluation of quality of studies published using the risk of bias tools**

The 489 articles were equally divided between six groups. The six groups received the guidance documents which were identified during the pilot phase

<sup>15 16 18-20</sup>. In addition, MvH and KB discussed questions with each individual group.

### *Evaluation of quality of studies published using QUADAS-2*

The RoB of the 41 included studies was low for 10 studies, high for 23 studies and unclear for eight. RoB concerning applicability was low for 10 studies, high for 21 studies and unclear for 10 studies (see Table 1). Table 2 shows the studies with an overall low RoB across both categories. Two studies were identified to have an overall low RoB <sup>21 22</sup>.

### *Evaluation of quality of studies published using PROBAST (Diagnostic)*

We identified 20 papers to be assessed with PROBAST. The RoB of three papers was low, that of 14 was high and was unclear for three. The applicability of eight papers was high and was unclear for two (see Table 1). Table 1 in the supplementary material shows the criteria on how to judge the RoB. One study had an overall low RoB across both domains. All categories except 'predictors' was scored to have a low risk of bias. There was little information available for the category predictors and therefore it was scored as 'unclear' (see Table 3).

### *Evaluation of quality of studies published using QUIPS*

The 12 assessors independently inserted the relevant information and assessed each domain such as participation, attrition, prognostic factor confounding and statistical analysis and reporting.

387 prognostic factors were assessed using QUIPs. 307 papers were classified as high RoB. Forty-nine papers were classified as having a moderate RoB and 28 papers were scored as low RoB (see Table 1). Out of the 28 papers with a low RoB, the most common moderate



1  
2  
3 bias was linked to attrition (12 papers), followed by confounding (4 papers), participation (3  
4  
5 papers), outcome (1 paper), statistical analysis (1 paper) (see Table 4).  
6  
7  
8  
9  
10

### 11 *Evaluation of quality of studies published using PROBAST (Prognostic)*

12  
13  
14 The assessors identified 44 papers to be assessed with PROBAST, of those three scored a  
15  
16 low RoB, 27 a high risk of bias and 13 were assessed as unclear (see Table 1). In terms of  
17  
18 applicability, 15 papers scored low, 20 high and eight unclear. Two papers were scored to  
19  
20 have an overall low RoB <sup>23 24</sup> (see Table 3).  
21  
22  
23

### 24 *Characteristics of studies identified with low risk of bias*

25  
26  
27 Details of the identified validated DPF models with an adequate quality are presented in  
28  
29 Table 5. We identified 32 studies with an overall low RoB (assessed with PROBAST, QUIPS,  
30  
31 QUADAS-2). Out of these 32 studies, we identified one validated diagnostic model (assessed  
32  
33 with PROBAST) <sup>25</sup>, two validated prognostic models (assessed with PROBAST) <sup>23 24</sup>, two non-  
34  
35 validated diagnostic single factors (assessed with QUADAS-2) <sup>21 22</sup> and 26 prognostic factors  
36  
37 (assessed with QUIPS) <sup>21-51</sup> which have not been validated and two single prognostic factors  
38  
39 which have been validated (assessed with QUIPS) <sup>35 51</sup>. Prognostic factors assessed with  
40  
41 QUIPS were identified with a low risk of bias for the localised PCa population. Sixty-seven  
42  
43 percent of the low RoB DPFs were intended to be measured after the treatment was  
44  
45 performed. In addition, the most commonly measured outcome was biochemical recurrence  
46  
47 (BRC) followed by overall survival (OS). It is, however, important to take into consideration  
48  
49 that even though from the studies assessed with a low RoB, only two out of the 32 were of a  
50  
51 non-observational study design.  
52  
53  
54  
55  
56  
57  
58  
59  
60

1  
2  
3 As highlighted above, we identified three validated DPFs which were scored to have a low  
4  
5 RoB and low risk concerning applicability. Firstly, we identified the 'Unified Prostate Cancer  
6  
7 Risk Prediction Model Combining the Stockholm3 Test and Magnetic Resonance Imaging', a  
8  
9 risk prediction model which combines clinical variables, genetic and protein biomarkers.  
10  
11 Five hundred and thirty two men were involved across three centres <sup>52</sup>. Secondly, the  
12  
13 DREAM challenge developed a set of five standardised raw event-level tables, using  
14  
15 laboratory values, patients' demographic information, medical history, lesion sites, previous  
16  
17 treatments, and vital signs of patients with metastatic castration-resistant PCa. These  
18  
19 variables were combined by using data from four clinical trials <sup>53</sup>. Thirdly, Joniau et al.  
20  
21 developed 'Pretreatment Tables' to predict the pathologic stage of locally advanced  
22  
23 prostate cancer after RP based on pre-treatment PSA level and biopsy Gleason score <sup>24</sup>.  
24  
25  
26 We identified two single factors which were validated and had low RoB. Firstly, Lara et al.,  
27  
28 assessed and validated the serum biomarkers of bone metabolism (N-telopeptide and  
29  
30 pyridinoline) and formation (C-terminal collagen propeptide and bone alkaline  
31  
32 phosphatase)) in 778 CRPC patients as part of the randomized phase III SWOG trial (S0421)  
33  
34 of docetaxel/prednisone with or without atrasentan <sup>35</sup>. Secondly, Berg et al, showed that  
35  
36 ERG expression can be used to estimate the risk of progression during AS including 265  
37  
38 patients at diagnosis and progression during AS <sup>51</sup>.  
39  
40  
41  
42  
43  
44  
45  
46  
47

## 48 Discussion

49  
50  
51 Despite the large number of studies on DPFs which are published every year, there is a  
52  
53 paucity of DPFs that are suitable to be incorporated into clinical practice. The majority of  
54  
55 DPFs have not yet been validated and are identified in poor quality studies. Our analysis  
56  
57 found that most identified studies had a high to moderate risk of bias due to poor design  
58  
59  
60

standards, conduct, reporting and/or analysis i.e., generalizability and size of the population, poor model development (no testing or missing important confounders) or only correlation studies, missing data was rarely reported. However, we did identify a small number of validated DPFs with low RoB. We identified three validated models which combine: firstly, clinical variables, genetic and protein biomarkers, and improved the clinical outcome performance of prostate cancer diagnostics (The Unified Prostate Cancer Risk Prediction Model)<sup>52</sup>; secondly, laboratory values, patients' demographic information, medical history, lesion sites, previous treatments, and vital signs of patients with metastatic castration-resistant PCa (DREAM challenge)<sup>53</sup>; thirdly, pre-treatment PSA level and biopsy Gleason score to predict the pathologic stage of locally advanced PCa ('Pretreatment Tables')<sup>24</sup>. Two single factors have been validated: the serum biomarkers of bone metabolism in CRPC patients<sup>35</sup> and the ERG expression, which can be used to estimate the risk of progression during AS<sup>51</sup>, which has been already highlighted in the clinical guidelines<sup>1</sup>.

Aladawani et al assessed prediction models for PCa to be used in primary care settings in their systematic review and identified five models which met their inclusion criteria. From these identified models only one model was externally validated and only one (the Lazzari model 2<sup>54</sup>) had the potential to be implemented in primary care. Lazzari et al. had the lowest RoB (based on PROBAST), however it must be externally validated before it can be implemented. Hence, Aladawani et al also concluded that the existing models have limitations concerning study design and reporting performance<sup>55</sup>.

Tian et al conducted a review on biomarkers for CRPC patients, however their quality assessment was focused on study design (RCT vs observational study), whereas we focused on biomarker specific tools<sup>56</sup>. Whilst Tian et al and our review identified similar factors and



1  
2  
3 different RoB assessment tools, which will enable an understanding of the quality of  
4  
5  
6 published studies.  
7

8  
9 Future research should therefore focus on addressing the identified shortcomings such as  
10  
11 heterogeneity, validation and poor RoB by designing more robust studies which consistently  
12  
13 include RoB assessments such as PROBAST, QUIPS or QUADAS-2.  
14  
15

16  
17 With the growing number of various therapeutic options, diagnosis and management of  
18  
19 prostate cancer require an individualised approach to patient care. There is an unmet need  
20  
21 for DPFs to guide decisions for optimal treatment and predict which patients will benefit the  
22  
23 most, from a particular management strategy. DPFs could potentially enhance the quality of  
24  
25 patient counselling, but currently most need additional evaluation and validation in properly  
26  
27 designed studies. Our systematic review highlights the need for well-designed Real-World  
28  
29 Evidence studies, while the PIONEER online search tool can inform the design of new  
30  
31 research studies, through providing a rigorous evaluation of the methodological quality of  
32  
33 the studies.  
34  
35  
36  
37  
38

39  
40 The main strength of this study are the extensive and comprehensive search and screening  
41  
42 of the studies included. In addition, we are developing an online search tool which  
43  
44 showcases the identified and assessed studies. It provides an overview of the available DPFS  
45  
46 and enables interested stakeholders to search for DPFs. To our knowledge, this is the first  
47  
48 study which has been performed with this extensive amount of literature.  
49  
50

### 51 52 **Patient and public Involvement** 53

54  
55 This project has been overseen by a multi-stakeholder group part of the PIONEER  
56  
57 Consortium. PIONEER brings together 32 key stakeholders from academic institutions,  
58  
59  
60

1  
2  
3 patient advocacy groups, European organisations, experts in legal data management,  
4  
5 clinicians and pharmaceutical companies, as well as regulatory agencies, economics and  
6  
7 ethics, and information and technology specialists. Patients and their family members are  
8  
9 therefore involved and actively participate as an integral part of all research conducted by  
10  
11 the PIONEER Consortium.  
12  
13  
14

## 15 16 **Limitations**

17  
18  
19 Even though this review included three searches and assessments by a multidisciplinary  
20  
21 group of fourteen researchers, we recognise potential limitations. Studies were only  
22  
23 included from 2014 onwards and DPFs developed before 2014 were not included. However,  
24  
25 significant changes which influence the staging of PCa (i.e., Consensus Conference on  
26  
27 Gleason Grading of Prostatic Carcinoma <sup>59</sup>) have taken place in diagnostic and prognostic  
28  
29 practice and patient management. This changed the staging of the patient population and  
30  
31 therefore has an impact on DPFs.  
32  
33  
34

35  
36  
37 In addition, there is a potential of subjectivity in the evaluation of the studies. Even though  
38  
39 the studies have been assessed in duplicate, there might be variation across groups.  
40

41  
42 However, given the overall moderate to high risk of bias, this does not influence the overall  
43  
44 recommendation of the project.  
45  
46  
47  
48  
49

## 50 51 **Conclusion**

52  
53 At present DPFs that are capable of significantly improving diagnosis and prognosis in  
54  
55 prostate cancer are an unmet need as most of the DPFs identified require additional  
56  
57 evaluation and validation in properly designed studies before they can be recommended for  
58  
59  
60

1  
2  
3 use in clinical practice. Well-designed RWE studies can help to increase quality. Our SR aims  
4  
5 to inform clinicians and patients about this rapidly evolving field, while the PIONEER online  
6  
7 search tool for diagnostic and prognostic factors for prostate cancer will enable researchers  
8  
9 to perform future research, and to understand the quality of the current available studies.  
10  
11  
12  
13  
14  
15

### 16 **Strengths and limitations of this study**

- 17  
18  
19 • A multidisciplinary team including patients, urologists, oncologists, radiation  
20  
21 oncologists, methodological experts and pathologists were involved throughout the  
22  
23 study.  
24  
25
- 26 • The search was restricted from 2014 onwards, to maintain a pragmatic approach.  
27  
28
- 29 • The main strength of this study are the extensive and comprehensive search and  
30  
31 screening of the studies included.  
32  
33  
34  
35  
36  
37  
38  
39  
40  
41  
42  
43  
44  
45  
46  
47  
48  
49  
50  
51  
52  
53  
54  
55  
56  
57  
58  
59  
60

1  
2  
3 Twitter: @ProstatePioneer  
4

5 Acknowledgement: PIONEER Consortium  
6  
7

8 Contributors: Katharina Beyer; Lisa Moris; Michael Lardas; Anna Haire; Francesco Barletta; Simone  
9 Scuderi; Megan Molnar; Muhammad Imran Omar; Steven MacLennan; Monique J. Roobol; Bahman  
10 Farahmand; Eleni Vradi; Zsuzsanna Devecseri, Alex Asiimwe; Jihong Zong; Sara J MacLennan,  
11 Laurence Collette; James N'Dow; Alberto Briganti; Anders Bjartell; Mieke Van Hemelrijck  
12 **conceptualised designed the review.**  
13  
14

15 **Abstracts and full texts were reviewed and data extracted** by Katharina Beyer; Lisa Moris; Michael  
16 Lardas; Anna Haire; Francesco Barletta; Simone Scuderi; Megan Molnar; Ronald Herrera; Abdul Rauf;  
17 Riccardo Campi; Isabella Greco; Kirill Shiranov; Thomas van den Broeck. **Authors resolved**  
18 **disagreement by discussion where necessary.**  
19

20 **The risk of bias was assessed by** Katharina Beyer; Lisa Moris; Michael Lardas; Anna Haire; Francesco  
21 Barletta; Simone Scuderi; Megan Molnar; Ronald Herrera; Abdul Rauf; Riccardo Campi; Isabella  
22 Greco; Kirill Shiranov; Saeed Dabestani.  
23  
24

25 **The manuscript was drafted by** Katharina Beyer; Lisa Moris; Michael Lardas; Anders Bjartell; Mieke  
26 Van Hemelrijck and **reviewed by** Katharina Beyer; Lisa Moris; Michael Lardas; Anna Haire; Francesco  
27 Barletta; Simone Scuderi; Megan Molnar; Ronald Herrera; Abdul Rauf; Riccardo Campi; Isabella  
28 Greco; Kirill Shiranov; Saeed Dabestani; Thomas van den Broeck; Sujenthiran Arun; Mauro Gacci;  
29 Giorgio Gandaglia; Muhammad Imran Omar; Steven MacLennan; Monique J. Roobol; Bahman  
30 Farahmand; Eleni Vradi; Zsuzsanna Devecseri, Alex Asiimwe; Jihong Zong; Sara J MacLennan,  
31 Laurence Collette; James N'Dow; Alberto Briganti; Anders Bjartell; Mieke Van Hemelrijck.  
32  
33  
34  
35  
36

37 **The whole project was supervised and guided** by Jihong Zong; Sara J MacLennan, Laurence Collette;  
38 James N'Dow; Alberto Briganti; Anders Bjartell; Mieke Van Hemelrijck.  
39  
40  
41  
42

43 Funding: PIONEER is funded through the IMI2 Joint Undertaking and is listed under Grant  
44 Agreement No. 777492 and is part of the Big Data for Better Outcomes Programme  
45 (BD4BO). IMI2 receives support from the European Union's Horizon 2020 research and  
46 innovation programme and the European Federation of Pharmaceutical Industries and  
47 Associations (EFPIA).  
48  
49  
50  
51  
52  
53

54 Competing interests: We have nothing to declare.  
55  
56  
57

58 Data sharing statement: No original data were generated for this study.  
59  
60



1  
2  
3  
4  
5 Open Access: This is an Open Access article distributed in accordance with the  
6  
7 Creative Commons Attribution Non Commercial (CC BY-NC 4.0) license, which  
8  
9 permits others to distribute, remix, adapt, build upon this work non-commercially,  
10  
11 and license their derivative works on different terms, provided the original work is  
12  
13 properly cited and the use is non-commercial. See: [http://creativecommons.org/](http://creativecommons.org/licenses/by-nc/4.0)  
14  
15 [licenses/by-nc/4.0](http://creativecommons.org/licenses/by-nc/4.0)  
16  
17  
18  
19  
20  
21  
22  
23  
24  
25  
26  
27  
28  
29  
30  
31  
32  
33  
34  
35  
36  
37  
38  
39  
40  
41  
42  
43  
44  
45  
46  
47  
48  
49  
50  
51  
52  
53  
54  
55  
56  
57  
58  
59  
60

For peer review only

## References

1. Mottet N, Briers E, Bolla M, Bourke L, Cornford P, De Santis M, Henry A, Joniau S, Lam T, Mason M.D., Van den Poel H, Van den Kwast T.H., Rouvière O, Wiegel T.; members of the EAU – ESTRO – ESUR – SIOG Prostate Cancer Guidelines Panel. EAU – ESTRO – ESUR – SIOG Guidelines on Prostate Cancer. EAU Annual Congress. Milan: EAU Guidelines Office, 2021.
2. Bray F, Ferlay J, Soerjomataram I, et al. Global cancer statistics 2018: GLOBOCAN estimates of incidence and mortality worldwide for 36 cancers in 185 countries. *CA: a cancer journal for clinicians* 2018;68(6):394-424. doi: 10.3322/caac.21492 [published Online First: 2018/09/13]
3. Filella X, Fernandez-Galan E, Fernandez Bonifacio R, et al. Emerging biomarkers in the diagnosis of prostate cancer. *Pharmacogenomics and personalized medicine* 2018;11:83-94. doi: 10.2147/pgpm.S136026 [published Online First: 2018/05/31]
4. Vedder MM, de Bekker-Grob EW, Lilja HG, et al. The added value of percentage of free to total prostate-specific antigen, PCA3, and a kallikrein panel to the ERSPC risk calculator for prostate cancer in prescreened men. *Eur Urol* 2014;66(6):1109-15. doi: 10.1016/j.eururo.2014.08.011 [published Online First: 2014/08/30]
5. Leyten GH, Hessels D, Jannink SA, et al. Prospective multicentre evaluation of PCA3 and TMPRSS2-ERG gene fusions as diagnostic and prognostic urinary biomarkers for prostate cancer. *Eur Urol* 2014;65(3):534-42. doi: 10.1016/j.eururo.2012.11.014 [published Online First: 2012/12/04]
6. Boegemann M, Stephan C, Cammann H, et al. The percentage of prostate-specific antigen (PSA) isoform [-2]proPSA and the Prostate Health Index improve the diagnostic accuracy for clinically relevant prostate cancer at initial and repeat biopsy compared with total PSA and percentage free PSA in men aged  $\leq 65$  years. *BJU international* 2016;117(1):72-9. doi: 10.1111/bju.13139 [published Online First: 2015/03/31]
7. Bryant RJ, Sjoberg DD, Vickers AJ, et al. Predicting high-grade cancer at ten-core prostate biopsy using four kallikrein markers measured in blood in the ProtecT study. *J Natl Cancer Inst* 2015;107(7) doi: 10.1093/jnci/djv095 [published Online First: 2015/04/12]
8. Mottet N, Bellmunt J, Bolla M, et al. EAU-ESTRO-SIOG Guidelines on Prostate Cancer. Part 1: Screening, Diagnosis, and Local Treatment with Curative Intent. *Eur Urol* 2017;71(4):618-29. doi: 10.1016/j.eururo.2016.08.003 [published Online First: 2016/08/30]
9. Eggener SE, Rumble RB, Armstrong AJ, et al. Molecular Biomarkers in Localized Prostate Cancer: ASCO Guideline. *Journal of Clinical Oncology* 2019;38(13):1474-94. doi: 10.1200/JCO.19.02768
10. Gillessen S, Attard G, Beer TM, et al. Management of Patients with Advanced Prostate Cancer: Report of the Advanced Prostate Cancer Consensus Conference 2019. *European Urology* 2020;77(4):508-47. doi: <https://doi.org/10.1016/j.eururo.2020.01.012>
11. Omar M, Roobol M, Ribal M, et al. Author Correction: Introducing PIONEER: a project to harness big data in prostate cancer research. *Nature Reviews Urology* 2020;17 doi: 10.1038/s41585-020-0355-3
12. Carlomagno N, Incollingo P, Tammaro V, et al. Diagnostic, Predictive, Prognostic, and Therapeutic Molecular Biomarkers in Third Millennium: A Breakthrough in Gastric Cancer. *Biomed Res Int* 2017;2017:7869802. doi: 10.1155/2017/7869802 [published Online First: 2017/11/03]
13. Moher D, Liberati A, Tetzlaff J, et al. Preferred reporting items for systematic reviews and meta-analyses: the PRISMA statement. *PLoS medicine* 2009;6(7):e1000097-e97. doi: 10.1371/journal.pmed.1000097
14. Beyer K, Moris L, Lardas M, et al. Diagnostic and prognostic factors in patients with prostate cancer: a systematic review protocol. *BMJ Open* 2021;11(2):e040531. doi: 10.1136/bmjopen-2020-040531
15. Whiting PF, Rutjes AW, Westwood ME, et al. QUADAS-2: a revised tool for the quality assessment of diagnostic accuracy studies. *Ann Intern Med* 2011;155(8):529-36. doi: 10.7326/0003-4819-155-8-201110180-00009 [published Online First: 2011/10/19]

16. Hayden JA, van der Windt DA, Cartwright JL, et al. Assessing bias in studies of prognostic factors. *Ann Intern Med* 2013;158(4):280-6. doi: 10.7326/0003-4819-158-4-201302190-00009 [published Online First: 2013/02/20]
17. Eggener SE, Rumble RB, Armstrong AJ, et al. Molecular Biomarkers in Localized Prostate Cancer: ASCO Guideline. *J Clin Oncol* 2020;38(13):1474-94. doi: 10.1200/jco.19.02768 [published Online First: 2019/12/13]
18. Moons KGM, Wolff RF, Riley RD, et al. PROBAST: A Tool to Assess Risk of Bias and Applicability of Prediction Model Studies: Explanation and Elaboration. *Ann Intern Med* 2019;170(1):W1-w33. doi: 10.7326/m18-1377 [published Online First: 2019/01/01]
19. Riley RD, Moons KGM, Snell KIE, et al. A guide to systematic review and meta-analysis of prognostic factor studies. *Bmj* 2019;364:k4597. doi: 10.1136/bmj.k4597 [published Online First: 2019/02/01]
20. Grooten WJA, Tseli E, Ång BO, et al. Elaborating on the assessment of the risk of bias in prognostic studies in pain rehabilitation using QUIPS—aspects of interrater agreement. *Diagnostic and Prognostic Research* 2019;3(1):5. doi: 10.1186/s41512-019-0050-0
21. Hagiwara K, Tobisawa Y, Kaya T, et al. Wisteria floribunda Agglutinin and Its Reactive-Glycan-Carrying Prostate-Specific Antigen as a Novel Diagnostic and Prognostic Marker of Prostate Cancer. *Int J Mol Sci* 2017;18(2) doi: 10.3390/ijms18020261 [published Online First: 2017/01/31]
22. Kelly BD, Miller N, Sweeney KJ, et al. A Circulating MicroRNA Signature as a Biomarker for Prostate Cancer in a High Risk Group. *J Clin Med* 2015;4(7):1369-79. doi: 10.3390/jcm4071369 [published Online First: 2015/08/05]
23. Guinney J, Wang T, Laajala TD, et al. Prediction of overall survival for patients with metastatic castration-resistant prostate cancer: development of a prognostic model through a crowdsourced challenge with open clinical trial data. *The Lancet Oncology* 2017;18(1):132-42. doi: 10.1016/s1470-2045(16)30560-5 [published Online First: 2016/11/20]
24. Joniau S, Spahn M, Briganti A, et al. Pretreatment tables predicting pathologic stage of locally advanced prostate cancer. *Eur Urol* 2015;67(2):319-25. doi: 10.1016/j.eururo.2014.03.013 [published Online First: 2014/04/02]
25. Palsdottir T, Nordström T, Aly M, et al. A Unified Prostate Cancer Risk Prediction Model Combining the Stockholm3 Test and Magnetic Resonance Imaging. *Eur Urol Oncol* 2019;2(5):490-96. doi: 10.1016/j.euo.2018.09.008 [published Online First: 2019/08/15]
26. Aguilera A, Bañuelos B, Díez J, et al. Biochemical recurrence risk factors in surgically treated high and very high-risk prostate tumors. *Cent European J Urol* 2015;68(3):302-7. doi: 10.5173/ceju.2015.485 [published Online First: 2015/11/17]
27. Bramhecha YM, Rouzbeh S, Guérard K-P, et al. The combination of PTEN deletion and 16p13.3 gain in prostate cancer provides additional prognostic information in patients treated with radical prostatectomy. *Modern Pathology* 2019;32(1):128-38. doi: 10.1038/s41379-018-0107-6
28. Alvim RG, Audenet F, Vertosick EA, et al. Performance Prediction for Surgical Outcomes in Partial Nephrectomy Using Nephrometry Scores: A Comparison of Arterial Based Complexity (ABC), RENAL, and PADUA Systems. *Eur Urol Oncol* 2018;1(5):428-34. doi: 10.1016/j.euo.2018.05.004 [published Online First: 2019/06/04]
29. Bruce HM, Stricker PD, Gupta R, et al. Loss of AZGP1 as a Superior Predictor of Relapse in Margin-Positive Localized Prostate Cancer. *Prostate* 2016;76(16):1491-500. doi: 10.1002/pros.23233 [published Online First: 2016/10/19]
30. Francini E, Gray KP, Xie W, et al. Time of metastatic disease presentation and volume of disease are prognostic for metastatic hormone sensitive prostate cancer (mHSPC). *The Prostate* 2018;78(12):889-95. doi: <https://doi.org/10.1002/pros.23645>
31. Hamada R, Nakashima J, Ohori M, et al. Preoperative predictive factors and further risk stratification of biochemical recurrence in clinically localized high-risk prostate cancer.

- 1  
2  
3 *International journal of clinical oncology* 2016;21(3):595-600. doi: 10.1007/s10147-015-  
4 0923-3  
5  
6 32. Hashimoto T, Nakashima J, Inoue R, et al. The significance of micro-lymphatic invasion and  
7 pathological Gleason score in prostate cancer patients with pathologically organ-confined  
8 disease and negative surgical margins after robot-assisted radical prostatectomy.  
9 *International journal of clinical oncology* 2020;25(2):377-83. doi: 10.1007/s10147-019-  
10 01561-4  
11  
12 33. Kato M, Kimura K, Hirakawa A, et al. Prognostic parameter for high risk prostate cancer patients  
13 at initial presentation. *Prostate* 2018;78(1):11-16. doi: 10.1002/pros.23438 [published  
14 Online First: 2017/11/03]  
15  
16 34. Kluth LA, Xylinas E, Rieken M, et al. Does increasing the nodal yield improve outcomes in  
17 contemporary patients without nodal metastasis undergoing radical prostatectomy?  
18 *Urologic oncology* 2014;32(1):47.e1-8. doi: 10.1016/j.urolonc.2013.06.013 [published Online  
19 First: 2013/09/24]  
20  
21 35. Lara PN, Jr., Ely B, Quinn DI, et al. Serum biomarkers of bone metabolism in castration-resistant  
22 prostate cancer patients with skeletal metastases: results from SWOG 0421. *J Natl Cancer*  
23 *Inst* 2014;106(4):dju013. doi: 10.1093/jnci/dju013 [published Online First: 2014/02/26]  
24  
25 36. Lee S, Kim KB, Jo JK, et al. Prognostic Value of Focal Positive Surgical Margins After Radical  
26 Prostatectomy. *Clinical Genitourinary Cancer* 2016;14(4):e313-e19. doi:  
27 <https://doi.org/10.1016/j.clgc.2015.12.013>  
28  
29 37. Lévesque E, Caron P, Lacombe L, et al. A Comprehensive Analysis of Steroid Hormones and  
30 Progression of Localized High-Risk Prostate Cancer. *Cancer Epidemiol Biomarkers Prev*  
31 2019;28(4):701-06. doi: 10.1158/1055-9965.Epi-18-1002 [published Online First:  
32 2019/02/09]  
33  
34 38. Lin YL, Li YL, Ma JG. Aberrant Promoter Methylation of Protocadherin8 (PCDH8) in Serum is a  
35 Potential Prognostic Marker for Low Gleason Score Prostate Cancer. *Med Sci Monit*  
36 2017;23:4895-900. doi: 10.12659/msm.904366 [published Online First: 2017/10/14]  
37  
38 39. Löffeler S, Weedon-Fekjaer H, Wang-Hansen MS, et al. "Natural course" of disease in patients  
39 with metastatic castrate-resistant prostate cancer: Survival and prognostic factors without  
40 life-prolonging treatment. *Scand J Urol* 2015;49(6):440-45. doi:  
41 10.3109/21681805.2015.1059881 [published Online First: 2015/07/04]  
42  
43 40. Narang AK, Trieu J, Radwan N, et al. End-of-radiation PSA as a novel prognostic factor in patients  
44 undergoing definitive radiation and androgen deprivation therapy for prostate cancer.  
45 *Prostate Cancer Prostatic Dis* 2017;20(2):203-09. doi: 10.1038/pcan.2016.67 [published  
46 Online First: 2017/01/18]  
47  
48 41. Ozden C, Aktas BK, Bulut S, et al. Effect of age on biochemical recurrence after radical  
49 prostatectomy. *Kaohsiung J Med Sci* 2017;33(2):91-95. doi: 10.1016/j.kjms.2016.11.002  
50 [published Online First: 2017/02/01]  
51  
52 42. Pei XQ, He DL, Tian G, et al. Prognostic factors of first-line docetaxel treatment in castration-  
53 resistant prostate cancer: roles of neutrophil-to-lymphocyte ratio in patients from  
54 Northwestern China. *International urology and nephrology* 2017;49(4):629-35. doi:  
55 10.1007/s11255-017-1524-z [published Online First: 2017/02/06]  
56  
57 43. Qu Y, Zhang C, Du E, et al. Pim-3 is a Critical Risk Factor in Development and Prognosis of  
58 Prostate Cancer. *Med Sci Monit* 2016;22:4254-60. doi: 10.12659/msm.898223 [published  
59 Online First: 2016/11/09]  
60  
61 44. Qu F, Xie W, Nakabayashi M, et al. Association of AR-V7 and Prostate-Specific Antigen RNA Levels  
62 in Blood with Efficacy of Abiraterone Acetate and Enzalutamide Treatment in Men with  
63 Prostate Cancer. *Clin Cancer Res* 2017;23(3):726-34. doi: 10.1158/1078-0432.Ccr-16-1070  
64 [published Online First: 2016/08/05]

- 1
- 2
- 3
- 4 45. Rüenauver K, Menon R, Svensson MA, et al. Prognostic significance of YWHAZ expression in  
5 localized prostate cancer. *Prostate Cancer Prostatic Dis* 2014;17(4):310-4. doi:  
6 10.1038/pcan.2014.32 [published Online First: 2014/08/27]
- 7 46. Shimodaira K, Nakashima J, Nakagami Y, et al. Prognostic Value of Platelet Counts in Patients  
8 with Metastatic Prostate Cancer Treated with Endocrine Therapy. *Urol J* 2020;17(1):42-49.  
9 doi: 10.22037/uj.v0i0.4735 [published Online First: 2019/03/19]
- 10 47. Strand SH, Hoyer S, Lynnerup AS, et al. High levels of 5-hydroxymethylcytosine (5hmC) is an  
11 adverse predictor of biochemical recurrence after prostatectomy in ERG-negative prostate  
12 cancer. *Clin Epigenetics* 2015;7:111. doi: 10.1186/s13148-015-0146-5 [published Online  
13 First: 2015/10/20]
- 14 48. Takagi M, Demizu Y, Terashima K, et al. Long-term outcomes in patients treated with proton  
15 therapy for localized prostate cancer. *Cancer Med* 2017;6(10):2234-43. doi:  
16 10.1002/cam4.1159 [published Online First: 2017/09/08]
- 17 49. Wang Y, Xu F, Pan J, et al. Platelet to lymphocyte ratio as an independent prognostic indicator for  
18 prostate cancer patients receiving androgen deprivation therapy. *BMC Cancer* 2016;16:329.  
19 doi: 10.1186/s12885-016-2363-5 [published Online First: 2016/05/26]
- 20 50. Zacho HD, Gade M, Mortensen JC, et al. Bone Scan Index Is an Independent Predictor of Time to  
21 Castration-resistant Prostate Cancer in Newly Diagnosed Prostate Cancer: A Prospective  
22 Study. *Urology* 2017;108:135-41. doi: 10.1016/j.urology.2017.05.058 [published Online First:  
23 2017/08/02]
- 24 51. Berg KD, Vainer B, Thomsen FB, et al. ERG protein expression in diagnostic specimens is  
25 associated with increased risk of progression during active surveillance for prostate cancer.  
26 *Eur Urol* 2014;66(5):851-60. doi: 10.1016/j.eururo.2014.02.058 [published Online First:  
27 2014/03/19]
- 28 52. Palsdottir T, Nordström T, Aly M, et al. A Unified Prostate Cancer Risk Prediction Model  
29 Combining the Stockholm3 Test and Magnetic Resonance Imaging. *European Urology  
30 Oncology* 2019;2(5):490-96. doi: <https://doi.org/10.1016/j.euo.2018.09.008>
- 31 53. Guinney J, Wang T, Laajala TD, et al. Prediction of overall survival for patients with metastatic  
32 castration-resistant prostate cancer: development of a prognostic model through a  
33 crowdsourced challenge with open clinical trial data. *The Lancet Oncology* 2017;18(1):132-  
34 42. doi: [https://doi.org/10.1016/S1470-2045\(16\)30560-5](https://doi.org/10.1016/S1470-2045(16)30560-5)
- 35 54. Lazzeri M, Haese A, de la Taille A, et al. Serum isoform [-2]proPSA derivatives significantly  
36 improve prediction of prostate cancer at initial biopsy in a total PSA range of 2-10 ng/ml: a  
37 multicentric European study. *Eur Urol* 2013;63(6):986-94. doi: 10.1016/j.eururo.2013.01.011  
38 [published Online First: 2013/02/05]
- 39 55. Aladwani M, Lophatananon A, Ollier W, et al. Prediction models for prostate cancer to be used in  
40 the primary care setting: a systematic review. *BMJ Open* 2020;10(7):e034661. doi:  
41 10.1136/bmjopen-2019-034661 [published Online First: 2020/07/22]
- 42 56. Tian S, Lei Z, Gong Z, et al. Clinical implication of prognostic and predictive biomarkers for  
43 castration-resistant prostate cancer: a systematic review. *Cancer Cell Int* 2020;20(1):409. doi:  
44 10.1186/s12935-020-01508-0
- 45 57. Harrison H, Thompson RE, Lin Z, et al. Risk Prediction Models for Kidney Cancer: A Systematic  
46 Review. *European urology focus* 2020 doi: <https://doi.org/10.1016/j.euf.2020.06.024>
- 47 58. Schmitz-Dräger BJ, Droller M, Lokeshwar VB, et al. Molecular markers for bladder cancer  
48 screening, early diagnosis, and surveillance: the WHO/ICUD consensus. *Urologia  
49 internationalis* 2015;94(1):1-24. doi: 10.1159/000369357 [published Online First:  
50 2014/12/17]
- 51 59. Epstein JI, Egevad L, Amin MB, et al. The 2014 International Society of Urological Pathology  
52 (ISUP) Consensus Conference on Gleason Grading of Prostatic Carcinoma: Definition of  
53 Grading Patterns and Proposal for a New Grading System. *The American journal of surgical  
54 pathology* 2016;40(1):1-12. doi: 10.1053/j.ajsp.2015.08.002 [published Online First:  
55 2015/10/20]
- 56
- 57
- 58
- 59
- 60

1  
2  
3 *pathology* 2016;40(2):244-52. doi: 10.1097/pas.0000000000000530 [published Online First:  
4 2015/10/23]

5 60. Hung SC, Yang CK, Cheng CL, et al. Long-term Oncologic Outcomes of Robotic-assisted Radical  
6 Prostatectomy by a Single Surgeon. *Anticancer Res* 2017;37(8):4157-64. doi:  
7 10.21873/anticanres.11803 [published Online First: 2017/07/26]  
8  
9  
10  
11  
12  
13  
14  
15  
16  
17  
18  
19  
20  
21  
22  
23  
24  
25  
26  
27  
28  
29  
30  
31  
32  
33  
34  
35  
36  
37  
38  
39  
40  
41  
42  
43  
44  
45  
46  
47  
48  
49  
50  
51  
52  
53  
54  
55  
56  
57  
58  
59  
60

For peer review only



Table 1: Overall judgment of RoB

| QUADAS-2, Diagnostic     |     |               |
|--------------------------|-----|---------------|
| Overall judgement of RoB | RoB | Applicability |
| Low                      | 10  | 10            |
| High                     | 23  | 21            |
| Unclear                  | 8   | 10            |
| Total                    | 41  |               |
| PROBAST, Diagnostic      |     |               |
| Overall judgement of RoB | RoB | Applicability |
| Low                      | 3   | 8             |
| High                     | 14  | 10            |
| Unclear                  | 3   | 2             |
| Total                    | 20  |               |
| QUIPS                    |     |               |
| Overall judgement of RoB | RoB |               |
| Low                      | 29  |               |
| Moderate                 | 49  |               |
| High                     | 307 |               |
| Total                    | 385 |               |
| PROBAST, Prognostic      |     |               |
| Overall judgement of RoB | RoB | Applicability |
| Low                      | 3   | 15            |
| High                     | 27  | 20            |
| Unclear                  | 13  | 8             |
| Total                    | 43  |               |

Table 2 non-validated DPFs with overall low risk of bias: QUADAS-2

| Author                  | Year | Patient Selection | Index Test(s) | Reference Standard | Flow and Timing | Patient Selection | Index Test(s) | Reference Standard | RoB | Applicability |
|-------------------------|------|-------------------|---------------|--------------------|-----------------|-------------------|---------------|--------------------|-----|---------------|
| <i>Hagiwara, et al.</i> | 2017 | low               | low           | low                | low             | low               | low           | low                | low | low           |
| <i>Kelly, et al.</i>    | 2015 | low               | low           | low                | low             | low               | low           | low                | low | low           |

Table 3: DPFs assessed with PROBAST

| Author                    | ROB          |            |         |          | APPLICABILITY |            |         | Overall |               |
|---------------------------|--------------|------------|---------|----------|---------------|------------|---------|---------|---------------|
|                           | Participants | Predictors | Outcome | Analysis | Participants  | Predictors | Outcome | ROB     | Applicability |
| Diagnostic                |              |            |         |          |               |            |         |         |               |
| <i>Guinney, et al.</i>    | Low          | Low        | Low     | Low      | Low           | Low        | Low     | Low     | Low           |
| <i>Joniau, et al.</i>     | Low          | Low        | Low     | Low      | Low           | Low        | Low     | Low     | Low           |
| Prognostic                |              |            |         |          |               |            |         |         |               |
| <i>Palsdottir, et al.</i> | low          | Unclear    | low     | low      | low           | low        | low     | low     | low           |

Table 4: Characteristics of DPFs with overall low risk of bias

| Author                                  | Year | RoB            | Population           | Study design        | Timing                 | Index                                                                                                                    | Outcomes                                              |
|-----------------------------------------|------|----------------|----------------------|---------------------|------------------------|--------------------------------------------------------------------------------------------------------------------------|-------------------------------------------------------|
| <i>Palsdottir, et al.</i> <sup>25</sup> | 2019 | Diag. PROB AST | Localised PCa        | Observational study | Pre treatment          | S3M-MRI (Stockholm3 + PI-RADS)                                                                                           | csPCa diagnosis                                       |
| <i>Guinney, et al.</i> <sup>23</sup>    | 2017 | Prog. PROB AST | mCRPC                | RCT                 | post treatment         | ePCR model                                                                                                               | OS                                                    |
| <i>Joniau, et al.</i> <sup>24</sup>     | 2017 | Prog. PROB AST | Locally advanced PCa | Observational study | Post-treatment         | Gleason score + PSA                                                                                                      | Adverse pathological features at RP; LNI              |
| <i>Hagiwara, et al.</i> <sup>21</sup>   | 2017 | QUAD AS        | Localised PCa        | Observational study | Pre-treatment          | WFA-reactive glycan-carrying PSA-Gi                                                                                      | PCa diagnosis, PSA-free survival                      |
| <i>Kelly, et al.</i> <sup>22</sup>      | 2015 | QUAD AS        | Localised PCa        | Observational study | Pre-treatment          | miR-141, -145, -155, let7a                                                                                               | PCa diagnosis                                         |
| <i>Aguilera, et al.</i> <sup>26</sup>   | 2015 | QUIPS          | High risk PCa        | Observational study | pre and post treatment | Age, rectal examination, PSA, biopsy Gleason score, uni/bilateral tumor, affected cylinder percentage) and postoperative | BCR                                                   |
| <i>Alvim, et al.</i> <sup>28</sup>      | 2019 | QUIPS          | Metastatic PCa       | Observational study | Post-treatment         | PSA response (PSA reduction $\geq$ 50%)                                                                                  | OS, PFS                                               |
| <i>Bramhecha, et al.</i> <sup>27</sup>  | 2019 | QUIPS          | Localised PCa        | Observational study | Post-treatment         | PTEN deletion                                                                                                            | BCR                                                   |
| <i>Bruce, et al.</i> <sup>29</sup>      | 2016 | QUIPS          | Localised PCa        | Observational study | Post-treatment         | AZGP1 expression                                                                                                         | BR-free survival, CR-free survival, PC-specific death |
| <i>Francini, et al.</i> <sup>30</sup>   | 2018 | QUIPS          | mHSPC                | Observational study | Post-treatment         | Volume                                                                                                                   | OS, time to CRPC                                      |
| <i>Hamada, et al.</i> <sup>31</sup>     | 2016 | QUIPS          | High risk PCa        | Observational study | Post-treatment         | PSA, PSA density (PSAD), PSA density of the transition zone, percentage of positive cores (PPC), prostate volume, TZ     | BCR                                                   |



|                                        |          |                 |               |                     |                |                                                                                                                                                                                                                 |                                                                 |
|----------------------------------------|----------|-----------------|---------------|---------------------|----------------|-----------------------------------------------------------------------------------------------------------------------------------------------------------------------------------------------------------------|-----------------------------------------------------------------|
|                                        |          |                 |               |                     |                | volume, Gleason score, PPC from the dominant side                                                                                                                                                               |                                                                 |
| <i>Hashimoto, et al.</i> <sup>32</sup> | 20<br>20 | QUIPS           | Localised PCa | Observational study | Post-treatment | micro-lymphatic invasion, Gleason                                                                                                                                                                               | BCR                                                             |
| <i>Hung, et al.</i> <sup>60</sup>      | 20<br>17 | QUIPS           | mCRPC         | Observational study | Post-treatment | Neurovascular bundle preservation, blood loss, pT stage, pN stage, pGS, PNI, angiolymphatic invasion, tumour amount in specimen, ECE, PSM, SVI, Bladder neck invasion, Foley duration, Post-op undetectable PSA | BCR                                                             |
| <i>Kato et al.</i> <sup>33</sup>       | 20<br>18 | QUIPS           | High risk PCa | Observational study | Post-treatment | LC/IDC                                                                                                                                                                                                          | Progression-free survival (PFS), Cancer-specific survival (CSS) |
| <i>Kluth, et al.</i> <sup>34</sup>     | 20<br>14 | QUIPS           | Localised PCa | Observational study | Post-treatment | number of lymph nodes                                                                                                                                                                                           | BCR                                                             |
| <i>Lara, et al.</i> <sup>35</sup>      | 20<br>14 | QUIPS Validated | mCRPC         | RCT                 | Post treatment | Bone resorption and formation                                                                                                                                                                                   | OS                                                              |
| <i>Lee, et al.</i> <sup>36</sup>       | 20<br>16 | QUIPS           | Localised PCa | Observational study | Post treatment | Positive surgical margin status and bilateral seminal vesicle invasion                                                                                                                                          | BCR                                                             |
| <i>Lévesque, et al.</i> <sup>37</sup>  | 20<br>19 | QUIPS           | Localised PCa | Observational study | Post treatment | UGT2B17 expression                                                                                                                                                                                              | BCR                                                             |
| <i>Lin, et al.</i> <sup>38</sup>       | 20<br>17 | QUIPS           | Localised PCa | Observational study | Post treatment | Aberrant Promoter Methylation of Protocadherin8 (PCDH8)                                                                                                                                                         | BRC-free survival                                               |
| <i>Löffeler, et al.</i> <sup>39</sup>  | 20<br>15 | QUIPS           | mCRPC         | Observational study | Anytime        | PSA doubling time, PSA nadir during ADT, hemoglobin and alkaline phosphatase levels at CRPC                                                                                                                     | OS                                                              |

|                                         |          |                 |                           |                     |                          |                                                             |                                                                                                       |
|-----------------------------------------|----------|-----------------|---------------------------|---------------------|--------------------------|-------------------------------------------------------------|-------------------------------------------------------------------------------------------------------|
| <i>Narang, et al.</i> <sup>40</sup>     | 20<br>17 | QUIPS           | Localised PCa             | Observational study | Anytime                  | PSA: End-of-radiation PSA                                   | BCR-free survival, MFS, CSS, OS                                                                       |
| <i>Ozden, et al.</i> <sup>41</sup>      | 20<br>17 | QUIPS           | Localised PCa             | Observational study | Post treatment           | Age                                                         | RRP specimen, BCR, and biochemical recurrence-free survival rates                                     |
| <i>Pei, et al.</i> <sup>42</sup>        | 20<br>16 | QUIPS           | CRPC                      | Observational study | pre and during treatment | Neutrophil-to-lymphocyte ratio                              | OS, PFS                                                                                               |
| <i>Qu, et al.</i> <sup>43</sup>         | 20<br>16 | QUIPS           | mPCa and CRPC             | Observational study | pre treatment            | AR-V7                                                       | Time to CRPC / CRPC: CSS                                                                              |
| <i>Qu, et al.</i> <sup>44</sup>         | 20<br>17 | QUIPS           | PCa                       | Observational study | pre and during treatment | AR-V7                                                       | OS                                                                                                    |
| <i>Ruenauer, et al.</i> <sup>45</sup>   | 20<br>14 | QUIPS           | Localised PCa             | Observational study | post treatment           | YWHAZ                                                       | OS                                                                                                    |
| <i>Shimodaira, et al.</i> <sup>46</sup> | 20<br>20 | QUIPS           | Metastatic PCa            | Observational study | post treatment           | Value of Platelet Counts                                    | Disease specific survival                                                                             |
| <i>Strand, et al.</i> <sup>47</sup>     | 20<br>15 | QUIPS           | Localised PCa             | Observational study | post treatment           | 5-hydroxymethylcytosine (5hmC) score                        | BCR                                                                                                   |
| <i>Takagi, et al.</i> <sup>48</sup>     | 20<br>17 | QUIPS           | Localised PCa             | Observational study | post treatment           | Age, T stage, % of pos cores, Gleason score, PSA, Total ADT | BCR-free survival                                                                                     |
| <i>Wang, et al.</i> <sup>49</sup>       | 20<br>16 | QUIPS           | PCa                       | Observational study | post treatment           | Platelet to lymphocyte ratio                                | PLR with progression-free survival (PFS), cancer-specific survival (CSS) and overall survival (OS)n/a |
| <i>Zacho, et al.</i> <sup>50</sup>      | 20<br>17 | QUIPS           | Localised PCa             | Observational study | anytime                  | Bone scan index                                             | Time to CRPC                                                                                          |
| <i>Berg, et al.</i> <sup>51</sup>       | 20<br>14 | QUIPS validated | Under Active Surveillance | Observational study |                          | ERG immunohistochemical staining                            | Overall AS progression, histopathologic progression                                                   |

Table 5: DPFs with low risk of bias assessed with QUIPS

| STUDY                    | Time | BIASES        |           |                   | Applicability |             |                                    | Overall score |
|--------------------------|------|---------------|-----------|-------------------|---------------|-------------|------------------------------------|---------------|
|                          |      | Participation | Attrition | Prognostic Factor | Outcome       | Confounding | Statistical analysis and reporting |               |
| <i>Aguilera, et al</i>   | 2015 | low           | low       | low               | low           | moderate    | low                                | low           |
| <i>Alvim, et al.</i>     | 2019 | low           | low       | low               | low           | low         | low                                | Low           |
| <i>Bramhecha, et al.</i> | 2019 | low           | moderate  | low               | low           | low         | low                                | Low           |
| <i>Bruce, et al.</i>     | 2016 | low           | moderate  | low               | low           | low         | low                                | Low           |
| <i>Francini, et al.</i>  | 2018 | low           | low       | low               | low           | low         | moderate                           | Low           |
| <i>Hamada, et al.</i>    | 2016 | low           | low       | low               | moderate      | low         | low                                | low           |
| <i>Hashimoto, et al.</i> | 2020 | low           | low       | low               | low           | low         | low                                | Low           |
| <i>Hung, et al.</i>      | 2017 | moderate      | low       | low               | low           | low         | low                                | Low           |
| <i>Kato, et al.</i>      | 2018 | low           | moderate  | low               | low           | low         | low                                | Low           |
| <i>Kluth, et al.</i>     | 2014 | low           | moderate  | low               | low           | low         | low                                | Low           |
| <i>Lara, et al.</i>      | 2014 | low           | low       | low               | low           | moderate    | low                                | Low           |
| <i>Lee, et al.</i>       | 2016 | low           | moderate  | low               | low           | low         | low                                | Low           |
| <i>Levesque, et al.</i>  | 2019 | low           | moderate  | low               | low           | low         | low                                | Low           |
| <i>Lin, et al.</i>       | 2017 | low           | moderate  | low               | low           | low         | low                                | Low           |
| <i>Loffeler, et al.</i>  | 2015 | low           | low       | low               | low           | low         | low                                | Low           |
| <i>Narang, et al.</i>    | 2017 | low           | moderate  | low               | low           | low         | low                                | Low           |
| <i>Ozden, et al.</i>     | 2017 | moderate      | low       | low               | low           | low         | low                                | Low           |
| <i>Pei, et al.</i>       | 2016 | low           | low       | moderate          | low           | low         | low                                | Low           |
| <i>Qu, et al.</i>        | 2016 | low           | low       | low               | low           | low         | low                                | Low           |
| <i>Qu F, et al.</i>      | 2017 | low           | low       | low               | low           | low         | low                                | Low           |
| <i>Rizzardi, et al.</i>  | 2015 | low           | low       | low               | low           | low         | low                                | low           |

|                           |      |          |          |          |     |          |     |     |
|---------------------------|------|----------|----------|----------|-----|----------|-----|-----|
| <i>Ruenauer, et al.</i>   | 2014 | low      | moderate | moderate | low | low      | low | Low |
| <i>Shimodaira, et al.</i> | 2020 | low      | moderate | low      | low | low      | low | Low |
| <i>Strand, et al.</i>     | 2015 | low      | moderate | low      | low | low      | low | Low |
| <i>Takagi, et al.</i>     | 2017 | low      | low      | low      | low | moderate | low | Low |
| <i>Wang, et al.</i>       | 2016 | low      | moderate | low      | low | low      | low | Low |
| <i>Zacho, et al.</i>      | 2017 | moderate | low      | low      | low | moderate | low | Low |
| <i>Berg, et al.</i>       | 2014 | low      | low      | low      | low | low      | low | Low |

**Figure 1:** Overview of four stage process

**Figure 2:** PRISMA flow diagram

**Figure 1:** Overview of four stage process

| Workflow   | Task                                                                                                                                                                                                                                                                                                                                                                                                                                                                                                                                                                                                                                                                                                                                                                                                                                                                                                                                                                                                   |
|------------|--------------------------------------------------------------------------------------------------------------------------------------------------------------------------------------------------------------------------------------------------------------------------------------------------------------------------------------------------------------------------------------------------------------------------------------------------------------------------------------------------------------------------------------------------------------------------------------------------------------------------------------------------------------------------------------------------------------------------------------------------------------------------------------------------------------------------------------------------------------------------------------------------------------------------------------------------------------------------------------------------------|
| Stage 1.   | Broad literature-based systematic review of diagnostic and prognostic factors (DPs) for all stages of prostate cancer from 2014 onwards (English only; humans). <ul style="list-style-type: none"> <li>Extract data from the included studies following the CHARMS-PF guideline.</li> </ul>                                                                                                                                                                                                                                                                                                                                                                                                                                                                                                                                                                                                                                                                                                            |
| Stage 2.   | Discussion of systematic review findings by a multidisciplinary expert panel <ul style="list-style-type: none"> <li>Review the list of included studies</li> </ul>                                                                                                                                                                                                                                                                                                                                                                                                                                                                                                                                                                                                                                                                                                                                                                                                                                     |
| Stage 3.   | Risk of Bias Assessment and applicability of individual studies using PROBAST, QUIPS and QUADAS-2                                                                                                                                                                                                                                                                                                                                                                                                                                                                                                                                                                                                                                                                                                                                                                                                                                                                                                      |
| Stage 4.   | Quantitative assessment of individual articles using meta-analytic techniques: <ul style="list-style-type: none"> <li>If PROBAST indicates low risk of bias and low concerns for applicability: Oxford Classification Centre for Evidence Based Medicine: <ol style="list-style-type: none"> <li>If there is Level 1a (SR of RCTs), we do not do a meta-analysis</li> <li>No Level 1a but &gt;2 RCTs, we do a meta-analysis</li> <li>No Level 1a/b, i.e. if at least two RCTs are now available, and systematic review of RCT evidence is not possible, we will identify whether there is a systematic review for observational studies (real world evidence; RWE), we do not do a meta-analysis</li> <li>If systematic review of RWE is not available, a systematic review of observational study will be conducted, and a meta-analysis will be performed if at least two RWEs studies are available and data pooling is feasible and there are low concerns of risk of bias.</li> </ol> </li> </ul> |
| Final aim: | Develop online PIONEER Online Search Tool for DPFs                                                                                                                                                                                                                                                                                                                                                                                                                                                                                                                                                                                                                                                                                                                                                                                                                                                                                                                                                     |

Figure 2: PRISMA flow diagram

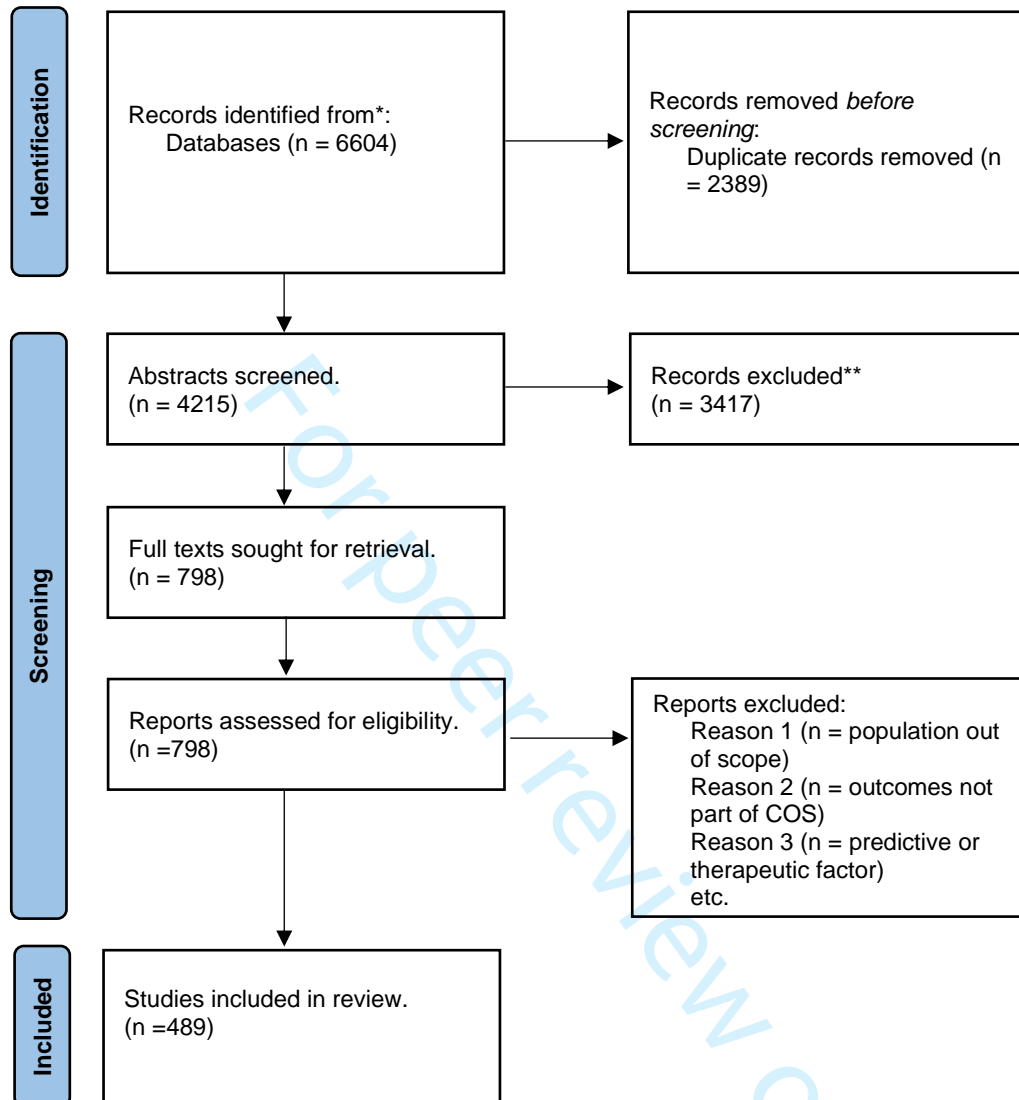

1  
2  
3  
4  
5  
6  
7  
8  
9  
10  
11  
12  
13  
14  
15  
16  
17  
18  
19  
20  
21  
22  
23  
24  
25  
26  
27  
28  
29  
30  
31  
32  
33  
34  
35  
36  
37  
38  
39  
40  
41  
42  
43  
44  
45  
46  
47  
48  
49  
50  
51  
52  
53  
54  
55  
56  
57  
58  
59  
60

**Supplementary material Table 1: Search strategy**

Database: OVID Medline Epub Ahead of Print, In-Process & Other Non-Indexed Citations, Ovid MEDLINE(R) Daily and Ovid MEDLINE(R) 1946 to Present, Embase <1974 to 2020 January 28>, EBM Reviews - Cochrane Database of Systematic Reviews <2005 to January 21, 2020>

Search Strategy:

- 
- 1 exp \*Prostatic Neoplasms/ (262435)
  - 2 exp \*prostate cancer/ (245472)
  - 3 (prostat\* adj2 (cancer\* or carcinoma\* or malignan\* or tumor\* or tumour\* or neoplas\* or adenocarcinoma\* or adenoma\*)).tw. (332251)
  - 4 or/1-3 (366427)
  - 5 ((diagnostic or prognos\* or predict\*) adj10 (biomarker or biomarkers or factor or factors)).tw,kw. (717487)
  - 6 ((diagnostic or prognos\* or predict\*) adj10 (Oncotype Dx Prostate or Prolaris or Decipher or Decipher PORTOS or ProMark)).tw,kw. (458)
  - 7 5 or 6 (717869)
  - 8 4 and 7 (17456)
  - 9 limit 8 to english language [Limit not valid in CDSR; records were retained] (16484)
  - 10 limit 9 to yr="2014 -Current" (8417)
  - 11 conference abstract.pt. or Congresses as Topic/ or Conference Review.pt. or "Journal: Conference Abstract".pt. (3815712)
  - 12 10 not 11 (5902)
  - 13 (exp animals/ or exp animal/ or exp nonhuman/ or exp animal experiment/ or animal model/ or animal tissue/ or non human/ or (rat or rats or mice or mouse or swine or porcine or murine or sheep or lambs or pigs or piglets or rabbit or rabbits or cat or cats or dog or dogs or cattle or bovine or monkey or monkeys or trout or marmoset\$1).ti.) not (humans/ or human/ or human experiment/ or (human\* or men or women or patients or subjects).tw.) (10251935)
  - 14 12 not 13 (5882)
  - 15 note/ or editorial/ or letter/ or Comment/ or news/ or (note or editorial or letter or Comment or news).pt. (4565255)
  - 16 14 not 15 (5811)
  - 17 (child/ or Pediatrics/ or Adolescent/ or Infant/ or adolescence/ or newborn/ or (baby or babies or child or children or pediatric\* or paediatric\* or peadiatric\* or infant\* or infancy or neonat\* or

newborn\* or new born\* or adolescen\* or preschool or pre-school or toddler\*).tw.) not (adult/ or aged/ or (aged or adult\* or elder\* or senior\* or men or women).tw.) (4146377)

18 16 not 17 (5794)

19 18 use ppez,oemez (5788)

20 10 use coch (6)

21 19 or 20 (5794)

22 remove duplicates from 21 (3140)

For peer review only



Supplementary material Table 2. Multidisciplinary expert meeting

| <b>Profession</b>                    | <b>Attendance</b> |
|--------------------------------------|-------------------|
| Urologist                            | Accepted          |
| Epidemiologist                       | Accepted          |
| Urologist                            | Accepted          |
| Epidemiologist/Pharma representative | Accepted          |
| Pathologist                          | Accepted          |
| Urologist                            | Accepted          |
| Urologist                            | Accepted          |
| Epidemiologist                       | Accepted          |
| Methodologist                        | Accepted          |
| Epidemiologist/Pharma representative | Accepted          |
| Urologist                            | Accepted          |
| Urologist/Methodologist              | Accepted          |
| Urologist                            | Accepted          |
| Urologist                            | Accepted          |
| Oncologist                           | Accepted          |
| Pharma representative                | Accepted          |
| Pharma representative                | Accepted          |
| Statistician/ Pharma representative  | Accepted          |

Table 3: PROBAST overall assessment

| Criteria                                                  | Reaching and overall judgement of RoB                       |                                                                                     |
|-----------------------------------------------------------|-------------------------------------------------------------|-------------------------------------------------------------------------------------|
| All domains are rated low risk.                           | Paper was classified as low RoB and low Applicability.      |  |
| One or more domain was judged to be high risk of bias.    | Paper was classified as high RoB and high Applicability.    |  |
| One or more domain was judged to be unclear risk of bias. | Paper was classified as unclear RoB and high Applicability. |  |

For peer review only

Supplementary material Table 4: QUIPS scoring

| Score of 6 domains                                                                | Overall RoB                                 |                                                                                     |
|-----------------------------------------------------------------------------------|---------------------------------------------|-------------------------------------------------------------------------------------|
| All domains were classified as having low RoB, or up to one moderate RoB.         | Paper was classified as low RoB             |  |
| One or more domains were classified as having high RoB, or $\geq 3$ moderate RoB. | Paper was classified as high RoB            |  |
| All papers in between.                                                            | Paper was classified as having moderate RoB |  |

For peer review only

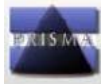

## PRISMA 2020 Checklist

| Section and Topic             | Item # | Checklist item                                                                                                                                                                                                                                                                                       | Location where item is reported |
|-------------------------------|--------|------------------------------------------------------------------------------------------------------------------------------------------------------------------------------------------------------------------------------------------------------------------------------------------------------|---------------------------------|
| <b>TITLE</b>                  |        |                                                                                                                                                                                                                                                                                                      |                                 |
| Title                         | 1      | Identify the report as a systematic review.                                                                                                                                                                                                                                                          | p1                              |
| <b>ABSTRACT</b>               |        |                                                                                                                                                                                                                                                                                                      |                                 |
| Abstract                      | 2      | See the PRISMA 2020 for Abstracts checklist.                                                                                                                                                                                                                                                         | P2                              |
| <b>INTRODUCTION</b>           |        |                                                                                                                                                                                                                                                                                                      |                                 |
| Rationale                     | 3      | Describe the rationale for the review in the context of existing knowledge.                                                                                                                                                                                                                          | P3                              |
| Objectives                    | 4      | Provide an explicit statement of the objective(s) or question(s) the review addresses.                                                                                                                                                                                                               | P4                              |
| <b>METHODS</b>                |        |                                                                                                                                                                                                                                                                                                      |                                 |
| Eligibility criteria          | 5      | Specify the inclusion and exclusion criteria for the review and how studies were grouped for the syntheses.                                                                                                                                                                                          | P5                              |
| Information sources           | 6      | Specify all databases, registers, websites, organisations, reference lists and other sources searched or consulted to identify studies. Specify the date when each source was last searched or consulted.                                                                                            | P5                              |
| Search strategy               | 7      | Present the full search strategies for all databases, registers and websites, including any filters and limits used.                                                                                                                                                                                 | P5                              |
| Selection process             | 8      | Specify the methods used to decide whether a study met the inclusion criteria of the review, including how many reviewers screened each record and each report retrieved, whether they worked independently, and if applicable, details of automation tools used in the process.                     | P5                              |
| Data collection process       | 9      | Specify the methods used to collect data from reports, including how many reviewers collected data from each report, whether they worked independently, any processes for obtaining or confirming data from study investigators, and if applicable, details of automation tools used in the process. | P5                              |
| Data items                    | 10a    | List and define all outcomes for which data were sought. Specify whether all results that were compatible with each outcome domain in each study were sought (e.g. for all measures, time points, analyses), and if not, the methods used to decide which results to collect.                        | P5                              |
|                               | 10b    | List and define all other variables for which data were sought (e.g. participant and intervention characteristics, funding sources). Describe any assumptions made about any missing or unclear information.                                                                                         | P5                              |
| Study risk of bias assessment | 11     | Specify the methods used to assess risk of bias in the included studies, including details of the tool(s) used, how many reviewers assessed each study and whether they worked independently, and if applicable, details of automation tools used in the process.                                    | P5                              |
| Effect measures               | 12     | Specify for each outcome the effect measure(s) (e.g. risk ratio, mean difference) used in the synthesis or presentation of results.                                                                                                                                                                  | n/a                             |
| Synthesis methods             | 13a    | Describe the processes used to decide which studies were eligible for each synthesis (e.g. tabulating the study intervention characteristics and comparing against the planned groups for each synthesis (item #5)).                                                                                 | P5                              |
|                               | 13b    | Describe any methods required to prepare the data for presentation or synthesis, such as handling of missing summary statistics, or data conversions.                                                                                                                                                | P5                              |
|                               | 13c    | Describe any methods used to tabulate or visually display results of individual studies and syntheses.                                                                                                                                                                                               | P5                              |
|                               | 13d    | Describe any methods used to synthesize results and provide a rationale for the choice(s). If meta-analysis was performed, describe the model(s), method(s) to identify the presence and extent of statistical heterogeneity, and software package(s) used.                                          | P5                              |
|                               | 13e    | Describe any methods used to explore possible causes of heterogeneity among study results (e.g. subgroup analysis, meta-regression).                                                                                                                                                                 | P5                              |
|                               | 13f    | Describe any sensitivity analyses conducted to assess robustness of the synthesized results.                                                                                                                                                                                                         | P5                              |
| Reporting bias assessment     | 14     | Describe any methods used to assess risk of bias due to missing results in a synthesis (arising from reporting biases).                                                                                                                                                                              | P6-8                            |
| Certainty                     | 15     | Describe any methods used to assess certainty (or confidence) in the body of evidence for an outcome.                                                                                                                                                                                                | n/a                             |

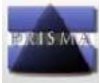

## PRISMA 2020 Checklist

| Section and Topic              | Item # | Checklist item                                                                                                                                                                                                                                                                                                                                               | Location where item is reported |
|--------------------------------|--------|--------------------------------------------------------------------------------------------------------------------------------------------------------------------------------------------------------------------------------------------------------------------------------------------------------------------------------------------------------------|---------------------------------|
| assessment                     |        |                                                                                                                                                                                                                                                                                                                                                              |                                 |
| <b>RESULTS</b>                 |        |                                                                                                                                                                                                                                                                                                                                                              |                                 |
| Study selection                | 16a    | Describe the results of the search and selection process, from the number of records identified in the search to the number of studies included in the review, ideally using a flow diagram.                                                                                                                                                                 | P6-11                           |
|                                | 16b    | Cite studies that might appear to meet the inclusion criteria, but which were excluded, and explain why they were excluded.                                                                                                                                                                                                                                  | P6-11                           |
| Study characteristics          | 17     | Cite each included study and present its characteristics.                                                                                                                                                                                                                                                                                                    | P6-11                           |
| Risk of bias in studies        | 18     | Present assessments of risk of bias for each included study.                                                                                                                                                                                                                                                                                                 | P6-11                           |
| Results of individual studies  | 19     | For all outcomes, present, for each study: (a) summary statistics for each group (where appropriate) and (b) an effect estimate and its precision (e.g. confidence/credible interval), ideally using structured tables or plots.                                                                                                                             | P6-11                           |
| Results of syntheses           | 20a    | For each synthesis, briefly summarise the characteristics and risk of bias among contributing studies.                                                                                                                                                                                                                                                       | P6-11                           |
|                                | 20b    | Present results of all statistical syntheses conducted. If meta-analysis was done, present for each the summary estimate and its precision (e.g. confidence/credible interval) and measures of statistical heterogeneity. If comparing groups, describe the direction of the effect.                                                                         | /                               |
|                                | 20c    | Present results of all investigations of possible causes of heterogeneity among study results.                                                                                                                                                                                                                                                               | /                               |
|                                | 20d    | Present results of all sensitivity analyses conducted to assess the robustness of the synthesized results.                                                                                                                                                                                                                                                   | /                               |
| Reporting biases               | 21     | Present assessments of risk of bias due to missing results (arising from reporting biases) for each synthesis assessed.                                                                                                                                                                                                                                      | /                               |
| Certainty of evidence          | 22     | Present assessments of certainty (or confidence) in the body of evidence for each outcome assessed.                                                                                                                                                                                                                                                          | /                               |
| <b>DISCUSSION</b>              |        |                                                                                                                                                                                                                                                                                                                                                              |                                 |
| Discussion                     | 23a    | Provide a general interpretation of the results in the context of other evidence.                                                                                                                                                                                                                                                                            | P12                             |
|                                | 23b    | Discuss any limitations of the evidence included in the review.                                                                                                                                                                                                                                                                                              | P15                             |
|                                | 23c    | Discuss any limitations of the review processes used.                                                                                                                                                                                                                                                                                                        | P15                             |
|                                | 23d    | Discuss implications of the results for practice, policy, and future research.                                                                                                                                                                                                                                                                               | P13-14                          |
| <b>OTHER INFORMATION</b>       |        |                                                                                                                                                                                                                                                                                                                                                              |                                 |
| Registration and protocol      | 24a    | Provide registration information for the review, including register name and registration number, or state that the review was not registered.                                                                                                                                                                                                               | Published with BMJ open         |
|                                | 24b    | Indicate where the review protocol can be accessed, or state that a protocol was not prepared.                                                                                                                                                                                                                                                               | /                               |
|                                | 24c    | Describe and explain any amendments to information provided at registration or in the protocol.                                                                                                                                                                                                                                                              | /                               |
| Support                        | 25     | Describe sources of financial or non-financial support for the review, and the role of the funders or sponsors in the review.                                                                                                                                                                                                                                | End of the manuscript           |
| Competing interests            | 26     | Declare any competing interests of review authors.                                                                                                                                                                                                                                                                                                           | In submission                   |
| Availability of data, code and | 27     | Report which of the following are publicly available and where they can be found: template data collection forms; data extracted from included studies; data used for all analyses; analytic code; any other materials used in the review. <a href="https://www.bmj.com/submit/about/guidelines.xhtml">https://www.bmj.com/submit/about/guidelines.xhtml</a> | Methods                         |

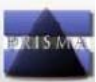

# PRISMA 2020 Checklist

1  
2  
3  
4  
5  
6  
7  
8  
9  
10  
11  
12  
13  
14  
15  
16  
17  
18  
19  
20  
21  
22  
23  
24  
25  
26  
27  
28  
29  
30  
31  
32  
33  
34  
35  
36  
37  
38  
39  
40  
41  
42  
43  
44  
45  
46  
47

| Section and Topic | Item # | Checklist item | Location where item is reported |
|-------------------|--------|----------------|---------------------------------|
| other materials   |        |                |                                 |

From: Page MJ, McKenzie JE, Bossuyt PM, Boutron I, Hoffmann TC, Mulrow CD, et al. The PRISMA 2020 statement: an updated guideline for reporting systematic reviews. *BMJ* 2021;372:n71. doi: 10.1136/bmj.n71  
 For more information, visit: <http://www.prisma-statement.org/>

For peer review only

# BMJ Open

## Diagnostic and prognostic factors in patients with prostate cancer: a systematic review

|                               |                                                                                                                                                                                                                                                                                                                                                                                                                                                                                                                                                                                                                                                                                                                                                                                                                                                                                                                                                                                                                                                                                                                                                                                                                                                                                                                                                                                                                                                                                                                                                                                                                                                                                                                                                                                                                                                                                                                                                                                                                                                                                                                                                    |
|-------------------------------|----------------------------------------------------------------------------------------------------------------------------------------------------------------------------------------------------------------------------------------------------------------------------------------------------------------------------------------------------------------------------------------------------------------------------------------------------------------------------------------------------------------------------------------------------------------------------------------------------------------------------------------------------------------------------------------------------------------------------------------------------------------------------------------------------------------------------------------------------------------------------------------------------------------------------------------------------------------------------------------------------------------------------------------------------------------------------------------------------------------------------------------------------------------------------------------------------------------------------------------------------------------------------------------------------------------------------------------------------------------------------------------------------------------------------------------------------------------------------------------------------------------------------------------------------------------------------------------------------------------------------------------------------------------------------------------------------------------------------------------------------------------------------------------------------------------------------------------------------------------------------------------------------------------------------------------------------------------------------------------------------------------------------------------------------------------------------------------------------------------------------------------------------|
| Journal:                      | <i>BMJ Open</i>                                                                                                                                                                                                                                                                                                                                                                                                                                                                                                                                                                                                                                                                                                                                                                                                                                                                                                                                                                                                                                                                                                                                                                                                                                                                                                                                                                                                                                                                                                                                                                                                                                                                                                                                                                                                                                                                                                                                                                                                                                                                                                                                    |
| Manuscript ID                 | bmjopen-2021-058267.R2                                                                                                                                                                                                                                                                                                                                                                                                                                                                                                                                                                                                                                                                                                                                                                                                                                                                                                                                                                                                                                                                                                                                                                                                                                                                                                                                                                                                                                                                                                                                                                                                                                                                                                                                                                                                                                                                                                                                                                                                                                                                                                                             |
| Article Type:                 | Original research                                                                                                                                                                                                                                                                                                                                                                                                                                                                                                                                                                                                                                                                                                                                                                                                                                                                                                                                                                                                                                                                                                                                                                                                                                                                                                                                                                                                                                                                                                                                                                                                                                                                                                                                                                                                                                                                                                                                                                                                                                                                                                                                  |
| Date Submitted by the Author: | 03-Feb-2022                                                                                                                                                                                                                                                                                                                                                                                                                                                                                                                                                                                                                                                                                                                                                                                                                                                                                                                                                                                                                                                                                                                                                                                                                                                                                                                                                                                                                                                                                                                                                                                                                                                                                                                                                                                                                                                                                                                                                                                                                                                                                                                                        |
| Complete List of Authors:     | <p>Beyer, Katharina; King's College London, Translational and Oncology Research (TOUR)</p> <p>Moris, Lisa; KU Leuven University Hospitals Leuven, Department of Urology</p> <p>Lardas, Michael; Metropolitan Hospital Athens, Department of Urology</p> <p>Haire, Anna ; King's College London, TOUR</p> <p>Barletta, Francesco; IRCCS Ospedale San Raffaele, Unit of Urology/Division of Oncology, URI</p> <p>Scuderi, Simone; IRCCS Ospedale San Raffaele, Unit of Urology/Division of Oncology, URI</p> <p>Molnar, Megan; Bayer AG</p> <p>Herrera, Ronald; Bayer AG</p> <p>Rauf, Abdul; Mid Cheshire Hospitals NHS Foundation Trust, Department of Urology</p> <p>Campi, Riccardo; Universita degli Studi di Firenze</p> <p>Greco, Isabella; University of Florence, Department of Minimally Invasive and Robotic Urologic Surgery and Kidney Transplantation</p> <p>Shiranov, Kirill; CDC "Zdorovie "</p> <p>Dabestani, Saeed; Lund University, Dept. of Translational Medicine</p> <p>van den Broeck, Thomas; University hospital leuven, Department of Urology</p> <p>Arun, Sujenthiran; PIONEER Consortium, Department of Urology, St George's NHS Foundation Trust, London</p> <p>Gacci, Mauro; University of Florence, Department of Minimally Invasive and Robotic Urologic Surgery and Kidney Transplantation</p> <p>Gandaglia, Giorgio; IRCCS Ospedale San Raffaele, Unit of Urology/Division of Oncology</p> <p>Omar, Muhammad; University of Aberdeen, Academic Urology Unit/ Cochrane Incontinence Group</p> <p>MacLennan, Steven; University of Aberdeen</p> <p>Roobol, Monique J.; Erasmus University Medical Center, Department of Urology</p> <p>Farahmand, Bahman; Bayer AG</p> <p>Vradi, Eleni; Bayer AG, Department of Epidemiology</p> <p>Devecseri, Zsuzsanna; Sanofi SA</p> <p>Asiimwe, Alex; Bayer Pharma AG, Medical Affairs and PV</p> <p>Zong, Jihong; Bayer U.S. , Epidemiology</p> <p>MacLennan, Sara; University of Aberdeen, Academic Urology Unit</p> <p>Collette, Laurence; EORTC Headquarters</p> <p>NDow, James; University of Aberdeen, Surgery</p> <p>Briganti , A; Vita-Salute University San Raffaele</p> |

1  
2  
3  
4  
5  
6  
7  
8  
9  
10  
11  
12  
13  
14  
15  
16  
17  
18  
19  
20  
21  
22  
23  
24  
25  
26  
27  
28  
29  
30  
31  
32  
33  
34  
35  
36  
37  
38  
39  
40  
41  
42  
43  
44  
45  
46  
47  
48  
49  
50  
51  
52  
53  
54  
55  
56  
57  
58  
59  
60

|                                      |                                                                                                                                            |
|--------------------------------------|--------------------------------------------------------------------------------------------------------------------------------------------|
|                                      | Bjartell, Anders; Skåne University Hospital<br>Van Hemelrijck, Mieke; King's College London, Translational and<br>Oncology Research (TOUR) |
| <b>Primary Subject<br/>Heading</b> : | Urology                                                                                                                                    |
| Secondary Subject Heading:           | Urology                                                                                                                                    |
| Keywords:                            | Prostate disease < UROLOGY, Urological tumours < ONCOLOGY,<br>Epidemiology < ONCOLOGY                                                      |
|                                      |                                                                                                                                            |

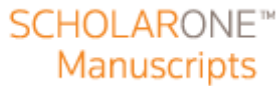





I, the Submitting Author has the right to grant and does grant on behalf of all authors of the Work (as defined in the below author licence), an exclusive licence and/or a non-exclusive licence for contributions from authors who are: i) UK Crown employees; ii) where BMJ has agreed a CC-BY licence shall apply, and/or iii) in accordance with the terms applicable for US Federal Government officers or employees acting as part of their official duties; on a worldwide, perpetual, irrevocable, royalty-free basis to BMJ Publishing Group Ltd ("BMJ") its licensees and where the relevant Journal is co-owned by BMJ to the co-owners of the Journal, to publish the Work in this journal and any other BMJ products and to exploit all rights, as set out in our [licence](#).

The Submitting Author accepts and understands that any supply made under these terms is made by BMJ to the Submitting Author unless you are acting as an employee on behalf of your employer or a postgraduate student of an affiliated institution which is paying any applicable article publishing charge ("APC") for Open Access articles. Where the Submitting Author wishes to make the Work available on an Open Access basis (and intends to pay the relevant APC), the terms of reuse of such Open Access shall be governed by a Creative Commons licence – details of these licences and which [Creative Commons](#) licence will apply to this Work are set out in our licence referred to above.

Other than as permitted in any relevant BMJ Author's Self Archiving Policies, I confirm this Work has not been accepted for publication elsewhere, is not being considered for publication elsewhere and does not duplicate material already published. I confirm all authors consent to publication of this Work and authorise the granting of this licence.

## Diagnostic and prognostic factors in patients with prostate cancer: a systematic review

### Author list:

Katharina Beyer<sup>a\*</sup>; Lisa Moris<sup>b\*</sup>; Michael Lardas<sup>c\*</sup>; Anna Haire<sup>a</sup>; Francesco Barletta<sup>d</sup>; Simone Scuderi<sup>d</sup>; Megan Molnar<sup>e</sup>; Ronald Herrera<sup>e</sup>; Abdul Rauff; Riccardo Campi<sup>g</sup>; Isabella Greco<sup>g</sup>; Kirill Shiranov<sup>h</sup>; Saeed Dabestani<sup>i</sup>; Thomas van den Broeck<sup>b</sup>; Sujenthiran Arun<sup>j</sup>; Mauro Gacci<sup>g</sup>; Giorgio Gandaglia<sup>d</sup>; Muhammad Imran Omar<sup>k</sup>; Steven MacLennan<sup>k</sup>; Monique J. Roobol<sup>l</sup>; Bahman Farahmand<sup>m</sup>; Eleni Vradi<sup>e</sup>; Zsuzsanna Devecseri<sup>n</sup>; Alex Asiimwe<sup>e</sup>; Jihong Zong<sup>o</sup>; Sara J MacLennan<sup>k</sup>; Laurence Collette<sup>p</sup>; James N'Dow<sup>l</sup>; Alberto Briganti<sup>d, q</sup>; Anders Bjartell<sup>r</sup>; Mieke Van Hemelrijck<sup>a\*</sup> and the PIONEER Consortium

\*Authors share first authorship

### Corresponding author:

Katharina Beyer,  
Translational Oncology and Urology Research (TOUR),  
School of Cancer and Pharmaceutical Studies,  
3rd Floor, Bermondsey Wing, Guy's Hospital, Great Maze  
Pond,  
London SE1 9RT,  
02071885594  
[katharina.beyer@kcl.ac.uk](mailto:katharina.beyer@kcl.ac.uk)

### Affiliations:

#### Affiliations:

a Translational and Oncology Research (TOUR), King's College London, Faculty of Life Sciences and Medicine, London, UK

b Department of Urology, University Hospitals Leuven, Leuven, Belgium

c Department of Urology, Metropolitan general, Athens, Greece

d Unit of Urology/Division of Oncology, URI, IRCCS Ospedale San Raffaele, Milan, Italy

e Department of Epidemiology, Bayer AG, Berlin, Germany

f Department of Urology, Mid Cheshire Hospitals, NHS Foundation Trust, Crewe CW1 4QJ, United Kingdom

g Department of Minimally Invasive and Robotic Urologic Surgery and Kidney Transplantation, University of Florence, Florence, Italy

h CDC "Zdorovie ", Rostov-on-Don, Russia

i Dept. of Translational Medicine, Division of Urological Cancers, Lund University, Kristianstad Central Hospital, Malmo, Sweden.

j Department of Urology, St George's NHS Foundation Trust, London

k Academic Urology Unit, University of Aberdeen, Aberdeen, UK

l Department of Urology, Erasmus University Medical Center, Rotterdam, The Netherlands.

1  
2  
3 M Global Epidemiology, Bayer AB, Stockholm, Sweden

4 n Sanofi, France

5  
6 o Global Medical Affairs Oncology, Real World Evidence, Bayer HealthCare Pharmaceuticals  
7 Inc., Whippany, New Jersey, USA

8 p EORTC Headquarters, Brussels, Belgium

9 q Department of Urology, University Vita e Salute-San Raffaele, Milan, Italy

10 r Department of Translational Medicine, Lund University, Malmö, Sweden

11  
12 **Word count of text:** 3305

13  
14  
15 **Word count of the abstract:** 380

16  
17  
18 **Key words:** Prostate cancer, diagnostic factor, prognostic factors, big data, RWE

19  
20  
21  
22  
23 **Email addresses co-authors:**

24  
25 lisa.moris1506@gmail.com<sup>b</sup>; lardamk@gmail.com<sup>c</sup>; anna.haire@kcl.ac.uk<sup>a</sup>;  
26 Barletta.Francesco@hsr.it<sup>d</sup>; Scuderi.Simone@hsr.it<sup>d</sup>; megan.molnar@bayer.com<sup>e</sup>;  
27 ronald.herrera@bayer.com<sup>e</sup>; dr.rauf82@gmail.com<sup>f</sup>; riccardo.campi@gmail.com<sup>g</sup>; isabella-  
28 greco@live.it<sup>g</sup>; urologgg@mail.ru<sup>h</sup>; saeed.dabestani@gmail.com<sup>i</sup>;  
29 vandenbroeck.thomas@gmail.com<sup>b</sup>; asujenthiran@doctors.net.uk<sup>j</sup>; maurogacci@yahoo.it<sup>g</sup>;  
30 gandaglia.giorgio@hsr.it<sup>d</sup>; m.i.omar@abdn.ac.uk<sup>k</sup>; steven.maclennan@abdn.ac.uk<sup>k</sup>;  
31 m.roobol@erasmusmc.nl<sup>l</sup>; bahman.farahmand@bayer.com<sup>m</sup>; eleni.vradi@bayer.com<sup>e</sup>;  
32 Zsuzsanna.Devecseri@sanofi.com<sup>n</sup>; alex.asiimwe@bayer.com<sup>e</sup>; jihong.zong@bayer.com<sup>o</sup>;  
33 s.maclennan@abdn.ac.uk<sup>k</sup>; Laurence.collette@iddi.com<sup>p</sup>; j.ndow@abdn.ac.uk<sup>l</sup>;  
34 briganti.alberto@hsr.it<sup>d</sup>; anders.bjartell@med.lu.se<sup>r</sup>; mieke.vanhemelrijck@kcl.ac.uk<sup>a</sup>

## Abstract

**Objectives:** As part of the PIONEER Consortium objectives, we have explored which diagnostic and prognostic factors (DPFs) are available in relation to our previously defined clinician and patient-reported outcomes (PROs) for prostate cancer (PCa).

**Design:** We performed a systematic review to identify validated and non-validated studies.

**Data sources:** MEDLINE, Embase and the Cochrane Library were searched on January 21, 2020.

**Eligibility criteria:** Only quantitative studies were included. Single studies with fewer than 50 participants, published before 2014 and looking at outcomes which are not prioritised in the PIONEER core outcome set will be excluded.

**Data extraction and synthesis:** After initial screening, we extracted data following the Checklist for Critical Appraisal and Data Extraction for Systematic Reviews of prognostic factor studies (CHARMS-PF) criteria and discussed the identified factors with a multidisciplinary expert group. The quality of the included papers was scored for applicability and risk of bias using validated tools such as PROBAST, QUIPS and QUADAS-2.

**Results:** The search identified 6,604 studies, from which 489 DPFs were included. Sixty-four of those were internally or externally validated. However, only three studies on diagnostic and seven studies on prognostic factors had a low risk of bias and a low risk concerning applicability.

**Conclusion:** Most of the DPFs identified require additional evaluation and validation in properly designed studies before they can be recommended for use in clinical practice. The PIONEER online search tool for diagnostic and prognostic factors for prostate cancer will

1  
2  
3 enable researchers to understand the quality of the current research and help them design  
4  
5 future studies.  
6  
7

8 **Ethics and Dissemination:** There are no ethical implications.  
9  
10

### 11 12 13 **Strengths and limitations of this study** 14

- 15  
16  
17 • A multidisciplinary team including patients, urologists, oncologists, radiation  
18  
19 oncologists, methodological experts and pathologists were involved throughout the  
20  
21 study.  
22  
23
- 24 • The search was restricted from 2014 onwards, to maintain a pragmatic approach.  
25  
26
- 27 • The main strength of this study are the extensive and comprehensive search and  
28  
29 screening of the studies included.  
30  
31  
32  
33  
34  
35  
36  
37  
38  
39  
40  
41  
42  
43  
44  
45  
46  
47  
48  
49  
50  
51  
52  
53  
54  
55  
56  
57  
58  
59  
60

## Introduction

Prostate cancer (PCa) accounts for 15% of cancers diagnosed<sup>1</sup> and is the second most common cancer in males worldwide<sup>2</sup>. PCa is clinically and molecularly heterogeneous and is usually suspected based upon the clinical findings of digital rectal examination (DRE) and/or Prostate Specific Antigen (PSA) levels<sup>1</sup>. However, which diagnostic or prognostic factor (DPF) can be used to select patients for specific therapeutic options remains largely unclear<sup>3</sup>. Specific biomarkers in urine or in blood are available on top of traditional PSA testing, such as PCA3, TMPRSS2-ERG fusion, or kallikreins as incorporated in the Phi or 4Kscore test together with other parameters including family history<sup>4-7</sup>. However, the European Association of Urology (EAU) guidelines (2019) currently do not provide general recommendations to implement these biomarkers into routine screening programmes due to limited data<sup>8</sup>. As part of the ASCO guidelines, Eggener et al recommended five commercially available biomarkers which have been shown to provide prognostic significance and additional information beyond standard clinical models in patient selection in the localised context: Oncotype Dx Prostate, Prolaris, Decipher, and ProMark<sup>9</sup>. However, no guidelines have recommended DPFs for other stages of PCa. The expert panel at the APCCC consensus meeting of advanced prostate cancer in Basel 2019, recommended AR-V7 for mCRPC as potentially useful, which ultimately led to the inclusion of AR-V7 testing in the NCCN guidelines<sup>10</sup>.

The PIONEER Consortium is an international collaboration coordinated by the European Association of Urology (EAU), which aims to establish the best evidence-based management and clinical practice of PCa across all disease stages using the power of big data analytics towards a more outcome-driven, value-based, and patient-centric healthcare system<sup>11</sup>. A

1  
2  
3 key objective is to address one of the major challenges within the context of diagnostic or  
4  
5 prognostic biomarkers/factors: the inability to incorporate DPFs into the management of  
6  
7 PCa in terms of screening, diagnosis and treatment. It is therefore important to summarise  
8  
9 and evaluate the evidence. Biomarkers can be classified into different types: diagnostic,  
10  
11 prognostic, predictive, and therapeutic – in this study we focus on the first two<sup>12</sup>. A  
12  
13 diagnostic biomarker or factor is useful when cancer is suspected and allows the early  
14  
15 detection based on symptoms or tests <sup>12</sup>. The overall aim of a diagnostic biomarker is to  
16  
17 distinguish people with the diseases from people without the disease. A prognostic  
18  
19 biomarker or factor is a clinical or biological characteristic which provides information on  
20  
21 the likely course of the disease i.e., biochemical progression or disease recurrence <sup>12</sup>. It  
22  
23 enables clinicians to decide on the most suitable treatment depending on the likely course  
24  
25 of the disease. In the sections below we have used the terms biomarkers and factors  
26  
27 interchangeably. Multiple diagnostic and prognostic factors (DPFs) can be measured in  
28  
29 tissue, blood or urine. These come with different advantages and disadvantages and only a  
30  
31 limited number of factors are currently available for PCa in standard clinical care.  
32  
33  
34  
35  
36  
37  
38  
39  
40  
41  
42  
43  
44  
45  
46  
47  
48  
49

50 We aimed to systematically review the evidence from 2014 onward to assess which DPFs  
51  
52 are available in relation to previously defined outcomes for PCa.  
53  
54  
55  
56  
57  
58  
59  
60

## 50 **Methods**

51 The systematic review followed the PRISMA guidelines <sup>13</sup>. A detailed protocol of the overall  
52  
53 project was published elsewhere <sup>14</sup> (please see the protocol attached as methods appendix).  
54  
55  
56

57 Briefly, we followed the following four steps (Figure 1):  
58  
59  
60

1  
2  
3 (1) Comprehensive systematic literature review of DPFs for all stages of PCa (localised,  
4 locally advanced, metastatic, and non-metastatic castration resistant) from 2014 onwards.  
5  
6 DPFs developed before 2014 were not included, due to the significant changes which  
7  
8 influence the staging of PCa (i.e., Consensus Conference on Gleason Grading of Prostatic  
9  
10 Carcinoma (60)) have taken place in diagnostic and prognostic practice and patient  
11  
12 management.  
13  
14  
15  
16

17 (2) Assessment and identification of final list of DPFs by a multidisciplinary expert panel.  
18

19 (3) Evaluation of quality of studies published using risk of bias tools: Prediction model Risk  
20  
21 Of Bias (RoB) Assessment Tool (PROBAST) if applicable; or Quality in Prognostic Studies  
22  
23 (QUIPS) tool for prognostic and the Quality Assessment of Diagnostic Accuracy Studies 2  
24  
25 (QUADAS-2) tool for diagnostic factors;  
26  
27

28 (4) Due to the heterogeneity of the studies identified no further formal quantitative  
29  
30 assessments in the form of a meta-analyses could be performed. Hence, the findings of  
31  
32 stages 1-3 have been reported here as the results of a systematic review.  
33  
34  
35  
36  
37  
38  
39

#### 40 Stage 1: Comprehensive literature review

41  
42 We developed the search criteria for the first search with an information scientist who  
43  
44 specialises in systematic reviews for urology. MEDLINE, Embase and the Cochrane Library  
45  
46 were searched on January 21, 2020. The second search was developed following a  
47  
48 consultation with an independent information scientist group who excluded row 12, 14 and  
49  
50 16 of Table 1 (see supplementary material). We screened the EAU Guidelines reference list  
51  
52 for PCa in our third search (see Figure 2).  
53  
54  
55  
56  
57  
58  
59  
60



## Stage 2: Multidisciplinary expert meeting

On the 20<sup>th</sup> of March 2020, we invited a group of multidisciplinary participants to discuss the identified articles on DPFs (see supplementary material Table 2). The participants were presented the search criteria and the extracted data. Data extraction followed the CHARMS-PF checklist and we added author and year of publication.

## Stage 3: Evaluation of quality of studies published using the risk of bias tools

Prior to the evaluation of the quality of studies, an initial pilot screening to prepare the raters for the use of PROBAST, QUADAS-2, QUIPS was performed. This aimed to reach consensus on how to judge the domains of the assessments using the three RoB tools. Two urologists (FB, SS) and two epidemiologists (AH, KB) were involved in the pilot assessments. The group discussed any discrepancies. Articles which presented the development and validation the internal validation or the external validation (i.e., the same data was used for both development and internal validation, such as bootstrapping or cross-validation; different populations were used for development and validation), of a diagnostic or prognostic model were assessed with PROBAST. Papers assessing single biomarkers or with/without validation were assessed with QUIPS for prognostic or QUADAS-2 for diagnostic biomarkers.

### *Evaluation of quality of studies published using QUADAS-2*

The RoB of diagnostic factors without validation or single validated factors was evaluated using QUADAS-2. We assessed the following four domains: patient selection, index test, reference standards and flow and timing. The first three domains are assessed looking at applicability and all four domains were assessed in terms of RoB <sup>15</sup>. We created a summative

1  
2  
3 score after the diagnostic studies were assessed by two reviewers and in case of  
4  
5 disagreement a third reviewer assessed the study.  
6  
7  
8  
9

#### 10 *Evaluation of quality of studies published using PROBAST (Diagnostic)*

11  
12 The RoB of internal or external validated diagnostic models was assessed using the PROBAST  
13  
14 RoB tool. PROBAST includes four domains assessing the RoB (i.e., participants, predictors,  
15  
16 outcome and analysis) and four domains assessing applicability (i.e., participants, predictors  
17  
18 and outcome) (see supplementary material Table 3 for scoring information).  
19  
20  
21  
22  
23  
24

#### 25 *Evaluation of quality of studies published using QUIPS*

26  
27 To assess the articles which are single factors or were not internally or externally validated,  
28  
29 we used the QUIPS rating procedure (see supplementary material Table 4 for scoring  
30  
31 information). To standardise the approach across raters, we used the QUIPS electronic  
32  
33 spreadsheet (excel) from Hayden et al<sup>16</sup>. There are no rules available for QUIPS on how to  
34  
35 score the overall RoB of a paper. Due to the large number of papers and the need for  
36  
37 synthesis, we followed Grooten et al's suggestions to categorise on the following criteria: 1)  
38  
39 Paper was classified as low RoB if all domains were classified as having low RoB, or up to  
40  
41 one moderate RoB; 2) Paper was classified as high RoB if one or more domains were  
42  
43 classified as having high RoB, or  $\geq 3$  moderate RoB; 3) Paper was classified as having  
44  
45 moderate RoB if all papers in between 1 or 2 (see table 1 supplementary material). This  
46  
47 assessment was based on the risk scores of individual assessments within the group. If the  
48  
49 overall assessment was not possible due to differences in the individual category, a third  
50  
51 assessor reviewed the assessments and the results were discussed.  
52  
53  
54  
55  
56  
57  
58  
59  
60

### *Evaluation of quality of studies published using PROBAST (Prognostic)*

The RoB of prognostic validated models were assessed using PROBAST. As highlighted above, PROBAST includes four domains assessing the RoB (i.e., participants, predictors, outcome and analysis) and four domains assessing applicability (i.e., participants, predictors and outcome).

## **Results**

### **Stage 1: Comprehensive literature review**

Stage 1 identified 6,604 citations and contained three independent searches. After removing duplicates, we screened 4,215 abstracts, from which 489 met the inclusion criteria.

### **Stage 2: Multidisciplinary expert meeting**

The group discussed the results and additional literature on DPFs was suggested to help the classification of the DPFs, such as the ASCO Guideline on Molecular Biomarkers in Localized Prostate Cancer<sup>17</sup>.

### **Stage 3: Evaluation of quality of studies published using the risk of bias tools**

The 489 articles were equally divided between six groups. The six groups received the guidance documents which were identified during the pilot phase

<sup>15 16 18-20</sup>. In addition, MvH and KB discussed questions with each individual group.

### Evaluation of quality of studies published using QUADAS-2

The RoB of the 41 included studies was low for 10 studies, high for 23 studies and unclear for eight. RoB concerning applicability was low for 10 studies, high for 21 studies and unclear for 10 studies (see Table 1). Table 2 shows the studies with an overall low RoB across both categories. Two studies were identified to have an overall low RoB <sup>21 22</sup>.

Table 1: Overall judgment of RoB

| QUADAS-2, Diagnostic     |     |               |
|--------------------------|-----|---------------|
| Overall judgement of RoB | RoB | Applicability |
| Low                      | 10  | 10            |
| High                     | 23  | 21            |
| Unclear                  | 8   | 10            |
| Total                    | 41  |               |
| PROBAST, Diagnostic      |     |               |
| Overall judgement of RoB | RoB | Applicability |
| Low                      | 3   | 8             |
| High                     | 14  | 10            |
| Unclear                  | 3   | 2             |
| Total                    | 20  |               |
| QUIPS                    |     |               |
| Overall judgement of RoB | RoB |               |
| Low                      | 29  |               |
| Moderate                 | 49  |               |
| High                     | 307 |               |
| Total                    | 385 |               |
| PROBAST, Prognostic      |     |               |
| Overall judgement of RoB | RoB | Applicability |
| Low                      | 3   | 15            |
| High                     | 27  | 20            |
| Unclear                  | 13  | 8             |
| Total                    | 43  |               |

Table 2 non-validated DPFs with overall low risk of bias: QUADAS-2

| Author           | Year | Patient Selection | Index Test(s) | Reference Standard | Flow and Timing | Patient Selection | Index Test(s) | Reference Standard | RoB | Applicability |
|------------------|------|-------------------|---------------|--------------------|-----------------|-------------------|---------------|--------------------|-----|---------------|
| Hagiwara, et al. | 2017 | low               | low           | low                | low             | low               | low           | low                | low | low           |
| Kelly, et al.    | 2015 | low               | low           | low                | low             | low               | low           | low                | low | low           |

### Evaluation of quality of studies published using PROBAST (Diagnostic)

We identified 20 papers to be assessed with PROBAST. The RoB of three papers was low, that of 14 was high and was unclear for three. The applicability of eight papers was high and was unclear for two (see Table 1). Table 1 in the supplementary material shows the criteria on how to judge the RoB. One study had an overall low RoB across both domains. All categories except 'predictors' was scored to have a low risk of bias. There was little information available for the category predictors and therefore it was scored as 'unclear' (see Table 3).

Table 3: DPFs assessed with PROBAST

| Author                   | ROB              |                |             |              | APPLICABILITY    |                |             | Overall |                   |
|--------------------------|------------------|----------------|-------------|--------------|------------------|----------------|-------------|---------|-------------------|
|                          | Particip<br>ants | Predict<br>ors | Outco<br>me | Analy<br>sis | Particip<br>ants | Predict<br>ors | Outco<br>me | RO<br>B | Applicab<br>ility |
| Diagnostic               |                  |                |             |              |                  |                |             |         |                   |
| <i>Guinney, et al.</i>   | Low              | Low            | Low         | Low          | Low              | Low            | Low         | Lo<br>w | Low               |
| <i>Joniau, et al.</i>    | Low              | Low            | Low         | Low          | Low              | Low            | Low         | Lo<br>w | Low               |
| Prognostic               |                  |                |             |              |                  |                |             |         |                   |
| <i>Palsdottir, et al</i> | low              | Unclea<br>r    | low         | low          | low              | low            | low         | lo<br>w | low               |

### Evaluation of quality of studies published using QUIPS

The 12 assessors independently inserted the relevant information and assessed each domain such as participation, attrition, prognostic factor confounding and statistical analysis and reporting.

387 prognostic factors were assessed using QUIPs. 307 papers were classified as high RoB. Forty-nine papers were classified as having a moderate RoB and 28 papers were scored as low RoB (see Table 1). Out of the 28 papers with a low RoB, the most common moderate

bias was linked to attrition (12 papers), followed by confounding (4 papers), participation (3 papers), outcome (1 paper), statistical analysis (1 paper) (see Table 4).

Table 4: Characteristics of DPFs with overall low risk of bias

| Author                                  | Year | RoB            | Population           | Study design        | Timing                 | Index                                                                                                                    | Outcomes                                              |
|-----------------------------------------|------|----------------|----------------------|---------------------|------------------------|--------------------------------------------------------------------------------------------------------------------------|-------------------------------------------------------|
| <i>Palsdottir, et al.</i> <sup>25</sup> | 2019 | Diag. PROB AST | Localised PCa        | Observational study | Pre treatment          | S3M-MRI (Stockholm3 + PI-RADS)                                                                                           | csPCa diagnosis                                       |
| <i>Guinney, et al.</i> <sup>23</sup>    | 2017 | Prog. PROB AST | mCRPC                | RCT                 | post treatment         | ePCR model                                                                                                               | OS                                                    |
| <i>Joniau, et al.</i> <sup>24</sup>     | 2017 | Prog. PROB AST | Locally advanced PCa | Observational study | Post-treatment         | Gleason score + PSA                                                                                                      | Adverse pathological features at RP; LNI              |
| <i>Hagiwara, et al.</i> <sup>21</sup>   | 2017 | QUAD AS        | Localised PCa        | Observational study | Pre-treatment          | WFA-reactive glycan-carrying PSA-Gi                                                                                      | PCa diagnosis, PSA-free survival                      |
| <i>Kelly, et al.</i> <sup>22</sup>      | 2015 | QUAD AS        | Localised PCa        | Observational study | Pre-treatment          | miR-141, -145, -155, let7a                                                                                               | PCa diagnosis                                         |
| <i>Aguilera, et al.</i> <sup>26</sup>   | 2015 | QUIPS          | High risk PCa        | Observational study | pre and post treatment | Age, rectal examination, PSA, biopsy Gleason score, uni/bilateral tumor, affected cylinder percentage) and postoperative | BCR                                                   |
| <i>Alvim, et al.</i> <sup>28</sup>      | 2019 | QUIPS          | Metastatic PCa       | Observational study | Post-treatment         | PSA response (PSA reduction $\geq$ 50%)                                                                                  | OS, PFS                                               |
| <i>Bramhecha, et al.</i> <sup>27</sup>  | 2019 | QUIPS          | Localised PCa        | Observational study | Post-treatment         | PTEN deletion                                                                                                            | BCR                                                   |
| <i>Bruce, et al.</i> <sup>29</sup>      | 2016 | QUIPS          | Localised PCa        | Observational study | Post-treatment         | AZGP1 expression                                                                                                         | BR-free survival, CR-free survival, PC-specific death |
| <i>Francini, et al.</i> <sup>30</sup>   | 2018 | QUIPS          | mHSPC                | Observational study | Post-treatment         | Volume                                                                                                                   | OS, time to CRPC                                      |
| <i>Hamada, et al.</i> <sup>31</sup>     | 2016 | QUIPS          | High risk PCa        | Observational study | Post-treatment         | PSA, PSA density (PSAD), PSA density of the                                                                              | BCR                                                   |

|                                        |          |                 |               |                     |                |                                                                                                                                                                                                                 |                                                                 |
|----------------------------------------|----------|-----------------|---------------|---------------------|----------------|-----------------------------------------------------------------------------------------------------------------------------------------------------------------------------------------------------------------|-----------------------------------------------------------------|
|                                        |          |                 |               |                     |                | transition zone, percentage of positive cores (PPC), prostate volume, TZ volume, Gleason score, PPC from the dominant side                                                                                      |                                                                 |
| <i>Hashimoto, et al.</i> <sup>32</sup> | 20<br>20 | QUIPS           | Localised PCa | Observational study | Post-treatment | micro-lymphatic invasion, Gleason                                                                                                                                                                               | BCR                                                             |
| <i>Hung, et al.</i> <sup>60</sup>      | 20<br>17 | QUIPS           | mCRPC         | Observational study | Post-treatment | Neurovascular bundle preservation, blood loss, pT stage, pN stage, pGS, PNI, angiolymphatic invasion, tumour amount in specimen, ECE, PSM, SVI, Bladder neck invasion, Foley duration, Post-op undetectable PSA | BCR                                                             |
| <i>Kato et al.</i> <sup>33</sup>       | 20<br>18 | QUIPS           | High risk PCa | Observational study | Post-treatment | LC/IDC                                                                                                                                                                                                          | Progression-free survival (PFS), Cancer-specific survival (CSS) |
| <i>Kluth, et al.</i> <sup>34</sup>     | 20<br>14 | QUIPS           | Localised PCa | Observational study | Post-treatment | number of lymph nodes                                                                                                                                                                                           | BCR                                                             |
| <i>Lara, et al.</i> <sup>35</sup>      | 20<br>14 | QUIPS Validated | mCRPC         | RCT                 | Post treatment | Bone resorption and formation                                                                                                                                                                                   | OS                                                              |
| <i>Lee, et al.</i> <sup>36</sup>       | 20<br>16 | QUIPS           | Localised PCa | Observational study | Post treatment | Positive surgical margin status and bilateral seminal vesicle invasion                                                                                                                                          | BCR                                                             |
| <i>Lévesque, et al.</i> <sup>37</sup>  | 20<br>19 | QUIPS           | Localised PCa | Observational study | Post treatment | UGT2B17 expression                                                                                                                                                                                              | BCR                                                             |
| <i>Lin, et al.</i> <sup>38</sup>       | 20<br>17 | QUIPS           | Localised PCa | Observational study | Post treatment | Aberrant Promoter Methylation of Protocadherin8 (PCDH8)                                                                                                                                                         | BRC-free survival                                               |
| <i>Löffeler, et al.</i> <sup>39</sup>  | 20<br>15 | QUIPS           | mCRPC         | Observational study | Anytime        | PSA doubling time, PSA nadir                                                                                                                                                                                    | OS                                                              |

|                                         |      |                 |                |                     |                          |                                                                |                                                                                                       |
|-----------------------------------------|------|-----------------|----------------|---------------------|--------------------------|----------------------------------------------------------------|-------------------------------------------------------------------------------------------------------|
|                                         |      |                 |                |                     |                          | during ADT, hemoglobin and alkaline phosphatase levels at CRPC |                                                                                                       |
| <i>Narang, et al.</i> <sup>40</sup>     | 2017 | QUIPS           | Localised PCa  | Observational study | Anytime                  | PSA: End-of-radiation PSA                                      | BCR-free survival, MFS, CSS, OS                                                                       |
| <i>Ozden, et al.</i> <sup>41</sup>      | 2017 | QUIPS           | Localised PCa  | Observational study | Post treatment           | Age                                                            | RRP specimen, BCR, and biochemical recurrence-free survival rates                                     |
| <i>Pei, et al.</i> <sup>42</sup>        | 2016 | QUIPS           | CRPC           | Observational study | pre and during treatment | Neutrophil-to-lymphocyte ratio                                 | OS, PFS                                                                                               |
| <i>Qu, et al.</i> <sup>43</sup>         | 2016 | QUIPS           | mPCa and CRPC  | Observational study | pre treatment            | AR-V7                                                          | Time to CRPC / CRPC: CSS                                                                              |
| <i>Qu, et al.</i> <sup>44</sup>         | 2017 | QUIPS           | PCa            | Observational study | pre and during treatment | AR-V7                                                          | OS                                                                                                    |
| <i>Ruenauber, et al.</i> <sup>45</sup>  | 2014 | QUIPS           | Localised PCa  | Observational study | post treatment           | YWHAZ                                                          | OS                                                                                                    |
| <i>Shimodaira, et al.</i> <sup>46</sup> | 2020 | QUIPS           | Metastatic PCa | Observational study | post treatment           | Value of Platelet Counts                                       | Disease specific survival                                                                             |
| <i>Strand, et al.</i> <sup>47</sup>     | 2015 | QUIPS           | Localised PCa  | Observational study | post treatment           | 5-hydroxymethylcytosine (5hmC) score                           | BCR                                                                                                   |
| <i>Takagi, et al.</i> <sup>48</sup>     | 2017 | QUIPS           | Localised PCa  | Observational study | post treatment           | Age, T stage, % of pos cores, Gleason score, PSA, Total ADT    | BCR-free survival                                                                                     |
| <i>Wang, et al.</i> <sup>49</sup>       | 2016 | QUIPS           | PCa            | Observational study | post treatment           | Platelet to lymphocyte ratio                                   | PLR with progression-free survival (PFS), cancer-specific survival (CSS) and overall survival (OS)n/a |
| <i>Zacho, et al.</i> <sup>50</sup>      | 2017 | QUIPS           | Localised PCa  | Observational study | anytime                  | Bone scan index                                                | Time to CRPC                                                                                          |
| <i>Berg, et al.</i> <sup>51</sup>       | 2014 | QUIPS validated | Under Active   | Observational study |                          | ERG immunohistochemical staining                               | Overall AS progression,                                                                               |



|  |  |  |              |  |  |                             |
|--|--|--|--------------|--|--|-----------------------------|
|  |  |  | Surveillance |  |  | histopathologic progression |
|--|--|--|--------------|--|--|-----------------------------|

### *Evaluation of quality of studies published using PROBAST (Prognostic)*

The assessors identified 44 papers to be assessed with PROBAST, of those three scored a low RoB, 27 a high risk of bias and 13 were assessed as unclear (see Table 1). In terms of applicability, 15 papers scored low, 20 high and eight unclear. Two papers were scored to have an overall low RoB<sup>23 24</sup> (see Table 3).

### *Characteristics of studies identified with low risk of bias*

Details of the identified validated DPF models with an adequate quality are presented in Table 5. We identified 32 studies with an overall low RoB (assessed with PROBAST, QUIPS, QUADAS-2). Out of these 32 studies, we identified one validated diagnostic model (assessed with PROBAST)<sup>25</sup>, two validated prognostic models (assessed with PROBAST)<sup>23 24</sup>, two non-validated diagnostic single factors (assessed with QUADAS-2)<sup>21 22</sup> and 26 prognostic factors (assessed with QUIPS)<sup>21-51</sup> which have not been validated and two single prognostic factors which have been validated (assessed with QUIPS)<sup>35 51</sup>. Prognostic factors assessed with QUIPS were identified with a low risk of bias for the localised PCa population. Sixty-seven percent of the low RoB DPFs were intended to be measured after the treatment was performed. In addition, the most commonly measured outcome was biochemical recurrence (BRC) followed by overall survival (OS). It is, however, important to take into consideration that even though from the studies assessed with a low RoB, only two out of the 32 were of a non-observational study design.

As highlighted above, we identified three validated DPFs which were scored to have a low RoB and low risk concerning applicability. Firstly, we identified the 'Unified Prostate Cancer Risk Prediction Model Combining the Stockholm3 Test and Magnetic Resonance Imaging', a risk prediction model which combines clinical variables, genetic and protein biomarkers. Five hundred and thirty two men were involved across three centres<sup>52</sup>. Secondly, the DREAM challenge developed a set of five standardised raw event-level tables, using laboratory values, patients' demographic information, medical history, lesion sites, previous treatments, and vital signs of patients with metastatic castration-resistant PCa. These variables were combined by using data from four clinical trials<sup>53</sup>. Thirdly, Joniau et al. developed 'Pretreatment Tables' to predict the pathologic stage of locally advanced prostate cancer after RP based on pre-treatment PSA level and biopsy Gleason score<sup>24</sup>.

We identified two single factors which were validated and had low RoB. Firstly, Lara et al., assessed and validated the serum biomarkers of bone metabolism (N-telopeptide and pyridinoline) and formation (C-terminal collagen propeptide and bone alkaline phosphatase) in 778 CRPC patients as part of the randomized phase III SWOG trial (S0421) of docetaxel/prednisone with or without atrasentan<sup>35</sup>. Secondly, Berg et al, showed that ERG expression can be used to estimate the risk of progression during AS including 265 patients at diagnosis and progression during AS<sup>51</sup>.

Table 5: DPFs with low risk of bias assessed with QUIPS

| STUDY                  | Time | BIASES        |           |                   | Applicability |             |                                    | Overall score |
|------------------------|------|---------------|-----------|-------------------|---------------|-------------|------------------------------------|---------------|
|                        |      | Participation | Attrition | Prognostic Factor | Outcome       | Confounding | Statistical analysis and reporting |               |
| <i>Aguilera, et al</i> | 2015 | low           | low       | low               | low           | moderate    | low                                | low           |
| <i>Alvim, et al.</i>   | 2019 | low           | low       | low               | low           | low         | low                                | Low           |

|                           |      |          |           |          |           |          |          |     |
|---------------------------|------|----------|-----------|----------|-----------|----------|----------|-----|
| <i>Bramhecha, et al.</i>  | 2019 | low      | mode rate | low      | low       | low      | low      | Low |
| <i>Bruce, et al.</i>      | 2016 | low      | mode rate | low      | low       | low      | low      | Low |
| <i>Francini, et al.</i>   | 2018 | low      | low       | low      | low       | low      | moderate | Low |
| <i>Hamada, et al.</i>     | 2016 | low      | low       | low      | mode rate | low      | low      | low |
| <i>Hashimoto, et al.</i>  | 2020 | low      | low       | low      | low       | low      | low      | Low |
| <i>Hung, et al.</i>       | 2017 | moderate | low       | low      | low       | low      | low      | Low |
| <i>Kato, et al.</i>       | 2018 | low      | mode rate | low      | low       | low      | low      | Low |
| <i>Kluth, et al.</i>      | 2014 | low      | mode rate | low      | low       | low      | low      | Low |
| <i>Lara, et al.</i>       | 2014 | low      | low       | low      | low       | moderate | low      | Low |
| <i>Lee, et al.</i>        | 2016 | low      | mode rate | low      | low       | low      | low      | Low |
| <i>Levesque, et al.</i>   | 2019 | low      | mode rate | low      | low       | low      | low      | Low |
| <i>Lin, et al.</i>        | 2017 | low      | mode rate | low      | low       | low      | low      | Low |
| <i>Loffeler, et al.</i>   | 2015 | low      | low       | low      | low       | low      | low      | Low |
| <i>Narang, et al.</i>     | 2017 | low      | mode rate | low      | low       | low      | low      | Low |
| <i>Ozden, et al.</i>      | 2017 | moderate | low       | low      | low       | low      | low      | Low |
| <i>Pei, et al.</i>        | 2016 | low      | low       | moderate | low       | low      | low      | Low |
| <i>Qu, et al.</i>         | 2016 | low      | low       | low      | low       | low      | low      | Low |
| <i>Qu F, et al.</i>       | 2017 | low      | low       | low      | low       | low      | low      | Low |
| <i>Rizzardi, et al.</i>   | 2015 | low      | low       | low      | low       | low      | low      | low |
| <i>Ruenauer, et al.</i>   | 2014 | low      | mode rate | moderate | low       | low      | low      | Low |
| <i>Shimodaira, et al.</i> | 2020 | low      | mode rate | low      | low       | low      | low      | Low |
| <i>Strand, et al.</i>     | 2015 | low      | mode rate | low      | low       | low      | low      | Low |
| <i>Takagi, et al.</i>     | 2017 | low      | low       | low      | low       | moderate | low      | Low |

|    |    |    |    |    |    |    |    |    |    |
|----|----|----|----|----|----|----|----|----|----|
| 1  | 2  | 3  | 4  | 5  | 6  | 7  | 8  | 9  | 10 |
| 11 | 12 | 13 | 14 | 15 | 16 | 17 | 18 | 19 | 20 |
| 21 | 22 | 23 | 24 | 25 | 26 | 27 | 28 | 29 | 30 |
| 31 | 32 | 33 | 34 | 35 | 36 | 37 | 38 | 39 | 40 |
| 41 | 42 | 43 | 44 | 45 | 46 | 47 | 48 | 49 | 50 |
| 51 | 52 | 53 | 54 | 55 | 56 | 57 | 58 | 59 | 60 |

## Discussion

Despite the large number of studies on DPFs which are published every year, there is a paucity of DPFs that are suitable to be incorporated into clinical practice. The majority of DPFs have not yet been validated and are identified in poor quality studies. Our analysis found that most identified studies had a high to moderate risk of bias due to poor design standards, conduct, reporting and/or analysis i.e., generalizability and size of the population, poor model development (no testing or missing important confounders) or only correlation studies, missing data was rarely reported. However, we did identify a small number of validated DPFs with low RoB. We identified three validated models which combine: firstly, clinical variables, genetic and protein biomarkers, and improved the clinical outcome performance of prostate cancer diagnostics (The Unified Prostate Cancer Risk Prediction Model)<sup>52</sup>; secondly, laboratory values, patients' demographic information, medical history, lesion sites, previous treatments, and vital signs of patients with metastatic castration-resistant PCa (DREAM challenge)<sup>53</sup>; thirdly, pre-treatment PSA level and biopsy Gleason score to predict the pathologic stage of locally advanced PCa ('Pretreatment Tables')<sup>24</sup>.

Two single factors have been validated: the serum biomarkers of bone metabolism in CRPC patients<sup>35</sup> and the ERG expression, which can be used to estimate the risk of progression during AS<sup>51</sup>, which has been already highlighted in the clinical guidelines<sup>1</sup>.

1  
2  
3 Aladawani et al assessed prediction models for PCa to be used in primary care settings in  
4 their systematic review and identified five models which met their inclusion criteria. From  
5 these identified models only one model was externally validated and only one (the Lazzari  
6 model 2<sup>54</sup>) had the potential to be implemented in primary care. Lazzari et al. had the  
7 lowest RoB (based on PROBAST), however it must be externally validated before it can be  
8 implemented. Hence, Aladawani et al also concluded that the existing models have  
9 limitations concerning study design and reporting performance<sup>55</sup>.

10  
11  
12  
13  
14  
15  
16  
17  
18  
19  
20  
21 Tian et al conducted a review on biomarkers for CRPC patients, however their quality  
22 assessment was focused on study design (RCT vs observational study), whereas we focused  
23 on biomarker specific tools<sup>56</sup>. Whilst Tian et al and our review identified similar factors and  
24 quality scores, there were slight discrepancies between the overall RoB assessments. Tian et  
25 al. used an overall quality assessment scale from 1-6 instead of low, medium and high. In  
26 their assessment the validated prognostic study by Lara et al.<sup>35</sup> and the non-validated  
27 prognostic factor by Pei et al.<sup>42</sup> were scored on the quality scale as 4 (medium quality). We  
28 assessed Lara et al.<sup>35</sup> to have a low risk of bias with a moderate risk of confounding and Pei  
29 et al.<sup>42</sup> with a moderate risk of bias concerning the prognostic factor itself. This might  
30 explain the discrepancies between the two quality assessments. The reports by Alvim et al.,  
31 Qu et al., were assessed to have the highest quality by Tian et al<sup>56</sup>, similar to our review.  
32 This illustrates that different quality assessment tools emphasize different criteria, which  
33 may result in small discrepancies. However, the overall conclusion for prognostic single  
34 factors was similar in our review and to the work of Tian et al.<sup>56</sup>.

35  
36  
37  
38  
39  
40  
41  
42  
43  
44  
45  
46  
47  
48  
49  
50  
51  
52  
53  
54  
55  
56 Similar issues have been identified for other urological cancers. For example, in kidney  
57 cancer, a large body of research was identified by Harrison et al., with very few validated  
58  
59  
60

1  
2  
3 studies and lots of heterogeneity<sup>57</sup>. Schmitz-Dräger et al. published an International  
4 Consultation of Urologic Disease (ICUD)/World Health Organization (WHO) Consensus  
5  
6 manuscript where they identified that in bladder cancer one of the main limitations for the  
7  
8 lack of incorporation of modern bladder cancer tests into clinical practice decision making is  
9  
10 linked to the scarcity of 'good clinical practice guidelines' for the evaluation of diagnostic  
11  
12 markers.  
13  
14  
15  
16

17  
18 There is a need for improved guidance on development and validation of diagnostic markers  
19  
20<sup>58</sup>. To meet that need, we are developing the PIONEER DPF search tool, which will help researchers  
21  
22 and clinicians to get a better understanding of the DPFs for prostate cancer. The tool will not  
23  
24 only summarise all relevant studies, but also provide information on the use and results of  
25  
26 different RoB assessment tools, which will enable an understanding of the quality of  
27  
28 published studies.  
29  
30  
31  
32

33  
34 Future research should therefore focus on addressing the identified shortcomings such as  
35  
36 heterogeneity, validation and poor RoB by designing more robust studies which consistently  
37  
38 include RoB assessments such as PROBAST, QUIPS or QUADAS-2.  
39  
40

41  
42 With the growing number of various therapeutic options, diagnosis and management of  
43  
44 prostate cancer require an individualised approach to patient care. There is an unmet need  
45  
46 for DPFs to guide decisions for optimal treatment and predict which patients will benefit the  
47  
48 most, from a particular management strategy. DPFs could potentially enhance the quality of  
49  
50 patient counselling, but currently most need additional evaluation and validation in properly  
51  
52 designed studies. Our systematic review highlights the need for well-designed Real-World  
53  
54 Evidence studies, while the PIONEER online search tool can inform the design of new  
55  
56  
57  
58  
59  
60

1  
2  
3 research studies, through providing a rigorous evaluation of the methodological quality of  
4  
5 the studies.  
6  
7

8  
9 The main strength of this study are the extensive and comprehensive search and screening  
10  
11 of the studies included. In addition, we are developing an online search tool which  
12  
13 showcases the identified and assessed studies. It provides an overview of the available DPFS  
14  
15 and enables interested stakeholders to search for DPFs. To our knowledge, this is the first  
16  
17 study which has been performed with this extensive amount of literature.  
18  
19

### 20 21 **Patient and public Involvement** 22

23  
24 This project has been overseen by a multi-stakeholder group part of the PIONEER  
25  
26 Consortium. PIONEER brings together 32 key stakeholders from academic institutions,  
27  
28 patient advocacy groups, European organisations, experts in legal data management,  
29  
30 clinicians and pharmaceutical companies, as well as regulatory agencies, economics and  
31  
32 ethics, and information and technology specialists. Patients and their family members are  
33  
34 therefore involved and actively participate as an integral part of all research conducted by  
35  
36 the PIONEER Consortium.  
37  
38  
39  
40

### 41 42 **Limitations** 43

44  
45 Even though this review included three searches and assessments by a multidisciplinary  
46  
47 group of fourteen researchers, we recognise potential limitations. Studies were only  
48  
49 included from 2014 onwards and DPFs developed before 2014 were not included. However,  
50  
51 significant changes which influence the staging of PCa (i.e., Consensus Conference on  
52  
53 Gleason Grading of Prostatic Carcinoma <sup>59</sup>) have taken place in diagnostic and prognostic  
54  
55  
56  
57  
58  
59  
60

1  
2  
3 practice and patient management. This changed the staging of the patient population and  
4  
5 therefore has an impact on DPFs.  
6  
7

8  
9 In addition, there is a potential of subjectivity in the evaluation of the studies. Even though  
10  
11 the studies have been assessed in duplicate, there might be variation across groups.  
12

13  
14 However, given the overall moderate to high risk of bias, this does not influence the overall  
15  
16 recommendation of the project.  
17  
18

## 19 20 21 22 **Conclusion**

23  
24  
25 At present DPFs that are capable of significantly improving diagnosis and prognosis in  
26  
27 prostate cancer are an unmet need as most of the DPFs identified require additional  
28  
29 evaluation and validation in properly designed studies before they can be recommended for  
30  
31 use in clinical practice. Well-designed RWE studies can help to increase quality. Our SR aims  
32  
33 to inform clinicians and patients about this rapidly evolving field, while the PIONEER online  
34  
35 search tool for diagnostic and prognostic factors for prostate cancer will enable researchers  
36  
37 to perform future research, and to understand the quality of the current available studies.  
38  
39  
40  
41  
42  
43  
44  
45  
46  
47  
48  
49  
50  
51  
52  
53  
54  
55  
56  
57  
58  
59  
60



1  
2  
3 Twitter: @ProstatePioneer  
4

5 Acknowledgement: PIONEER Consortium  
6  
7

8 Contributors: PIONEER Consortium  
9  
10

11 Funding: PIONEER is funded through the IMI2 Joint Undertaking and is listed under Grant  
12

13 Agreement No. 777492 and is part of the Big Data for Better Outcomes Programme  
14

15 (BD4BO). IMI2 receives support from the European Union's Horizon 2020 research and  
16

17 innovation programme and the European Federation of Pharmaceutical Industries and  
18

19 Associations (EFPIA).  
20  
21

22 Competing interests: We have nothing to declare.  
23  
24

25 Data sharing statement: No original data were generated for this study.  
26  
27

28 Open Access: This is an Open Access article distributed in accordance with the  
29

30 Creative Commons Attribution Non Commercial (CC BY-NC 4.0) license, which  
31

32 permits others to distribute, remix, adapt, build upon this work non-commercially,  
33

34 and license their derivative works on different terms, provided the original work is  
35

36 properly cited and the use is non-commercial. See: [http://creativecommons.org/](http://creativecommons.org/licenses/by-nc/4.0)  
37

38 licenses/by-nc/4.0  
39  
40  
41  
42  
43  
44  
45

46 Contributors:

47 Katharina Beyer; Lisa Moris; Michael Lardas; Anna Haire; Francesco Barletta; Simone  
48 Scuderi; Megan Molnar; Muhammad Imran Omar; Steven MacLennan; Monique J. Roobol;  
49 Bahman Farahmand; Eleni Vradi; Zsuzsanna Devecseri, Alex Asiimwe; Jihong Zong; Sara J  
50 MacLennan, Laurence Collette; James N'Dow; Alberto Briganti; Anders Bjartell; Mieke Van  
51 Hemelrijck conceptualised designed the review.  
52  
53

54 Abstracts and full texts were reviewed and data extracted by Katharina Beyer; Lisa Moris;  
55 Michael Lardas; Anna Haire; Francesco Barletta; Simone Scuderi; Megan Molnar; Ronald  
56 Herrera; Abdul Rauf; Riccardo Campi; Isabella Greco; Kirill Shiranov; Thomas van den Broeck,  
57 Sujenthiran Arunj. Authors resolved disagreement by discussion where necessary.  
58  
59  
60

1  
2  
3 The risk of bias was assessed by Katharina Beyer; Lisa Moris; Michael Lardas; Anna Haire;  
4 Francesco Barletta; Simone Scuderi; Megan Molnar; Ronald Herrera; Abdul Rauf; Riccardo  
5 Campi; Isabella Greco; Kirill Shiranov; Saeed Dabestani.  
6

7  
8 The manuscript was drafted by Katharina Beyer; Lisa Moris; Michael Lardas; Anders Bjartell;  
9 Mieke Van Hemelrijck and reviewed by Katharina Beyer; Lisa Moris; Michael Lardas; Anna  
10 Haire; Francesco Barletta; Simone Scuderi; Megan Molnar; Ronald Herrera; Abdul Rauf;  
11 Riccardo Campi; Isabella Greco; Kirill Shiranov; Saeed Dabestani; Thomas van den Broeck;  
12 Mauro Gacci; Giorgio Gandaglia; Muhammad Imran Omar; Steven MacLennan; Monique J.  
13 Roobol; Bahman Farahmand; Eleni Vradi; Zsuzsanna Devecseri, Alex Asiimwe; Jihong Zong;  
14 Sara J MacLennan, Laurence Collette; James N'Dow; Alberto Briganti; Anders Bjartell; Mieke  
15 Van Hemelrijck.  
16

17  
18 The whole project was supervised and guided by Jihong Zong; Sara J MacLennan, Laurence  
19 Collette; James N'Dow; Alberto Briganti; Anders Bjartell; Mieke Van Hemelrijck.  
20  
21  
22  
23  
24  
25  
26  
27  
28  
29  
30  
31  
32  
33  
34  
35  
36  
37  
38  
39  
40  
41  
42  
43  
44  
45  
46  
47  
48  
49  
50  
51  
52  
53  
54  
55  
56  
57  
58  
59  
60

## References

1. Mottet N, Briers E, Bolla M, Bourke L, Cornford P, De Santis M, Henry A, Joniau S, Lam T, Mason M.D., Van den Poel H, Van den Kwast T.H., Rouvière O, Wiegel T.; members of the EAU – ESTRO – ESUR – SIOG Prostate Cancer Guidelines Panel. EAU – ESTRO – ESUR – SIOG Guidelines on Prostate Cancer. EAU Annual Congress. Milan: EAU Guidelines Office, 2021.
2. Bray F, Ferlay J, Soerjomataram I, et al. Global cancer statistics 2018: GLOBOCAN estimates of incidence and mortality worldwide for 36 cancers in 185 countries. *CA: a cancer journal for clinicians* 2018;68(6):394-424. doi: 10.3322/caac.21492 [published Online First: 2018/09/13]
3. Filella X, Fernandez-Galan E, Fernandez Bonifacio R, et al. Emerging biomarkers in the diagnosis of prostate cancer. *Pharmacogenomics and personalized medicine* 2018;11:83-94. doi: 10.2147/pgpm.S136026 [published Online First: 2018/05/31]
4. Vedder MM, de Bekker-Grob EW, Lilja HG, et al. The added value of percentage of free to total prostate-specific antigen, PCA3, and a kallikrein panel to the ERSPC risk calculator for prostate cancer in prescreened men. *Eur Urol* 2014;66(6):1109-15. doi: 10.1016/j.eururo.2014.08.011 [published Online First: 2014/08/30]
5. Leyten GH, Hessels D, Jannink SA, et al. Prospective multicentre evaluation of PCA3 and TMPRSS2-ERG gene fusions as diagnostic and prognostic urinary biomarkers for prostate cancer. *Eur Urol* 2014;65(3):534-42. doi: 10.1016/j.eururo.2012.11.014 [published Online First: 2012/12/04]
6. Boegemann M, Stephan C, Cammann H, et al. The percentage of prostate-specific antigen (PSA) isoform [-2]proPSA and the Prostate Health Index improve the diagnostic accuracy for clinically relevant prostate cancer at initial and repeat biopsy compared with total PSA and percentage free PSA in men aged  $\leq 65$  years. *BJU international* 2016;117(1):72-9. doi: 10.1111/bju.13139 [published Online First: 2015/03/31]
7. Bryant RJ, Sjoberg DD, Vickers AJ, et al. Predicting high-grade cancer at ten-core prostate biopsy using four kallikrein markers measured in blood in the ProtecT study. *J Natl Cancer Inst* 2015;107(7) doi: 10.1093/jnci/djv095 [published Online First: 2015/04/12]
8. Mottet N, Bellmunt J, Bolla M, et al. EAU-ESTRO-SIOG Guidelines on Prostate Cancer. Part 1: Screening, Diagnosis, and Local Treatment with Curative Intent. *Eur Urol* 2017;71(4):618-29. doi: 10.1016/j.eururo.2016.08.003 [published Online First: 2016/08/30]
9. Eggener SE, Rumble RB, Armstrong AJ, et al. Molecular Biomarkers in Localized Prostate Cancer: ASCO Guideline. *Journal of Clinical Oncology* 2019;38(13):1474-94. doi: 10.1200/JCO.19.02768
10. Gillessen S, Attard G, Beer TM, et al. Management of Patients with Advanced Prostate Cancer: Report of the Advanced Prostate Cancer Consensus Conference 2019. *European Urology* 2020;77(4):508-47. doi: <https://doi.org/10.1016/j.eururo.2020.01.012>
11. Omar M, Roobol M, Ribal M, et al. Author Correction: Introducing PIONEER: a project to harness big data in prostate cancer research. *Nature Reviews Urology* 2020;17 doi: 10.1038/s41585-020-0355-3
12. Carlomagno N, Incollingo P, Tammaro V, et al. Diagnostic, Predictive, Prognostic, and Therapeutic Molecular Biomarkers in Third Millennium: A Breakthrough in Gastric Cancer. *Biomed Res Int* 2017;2017:7869802. doi: 10.1155/2017/7869802 [published Online First: 2017/11/03]
13. Moher D, Liberati A, Tetzlaff J, et al. Preferred reporting items for systematic reviews and meta-analyses: the PRISMA statement. *PLoS medicine* 2009;6(7):e1000097-e97. doi: 10.1371/journal.pmed.1000097
14. Beyer K, Moris L, Lardas M, et al. Diagnostic and prognostic factors in patients with prostate cancer: a systematic review protocol. *BMJ Open* 2021;11(2):e040531. doi: 10.1136/bmjopen-2020-040531
15. Whiting PF, Rutjes AW, Westwood ME, et al. QUADAS-2: a revised tool for the quality assessment of diagnostic accuracy studies. *Ann Intern Med* 2011;155(8):529-36. doi: 10.7326/0003-4819-155-8-201110180-00009 [published Online First: 2011/10/19]

16. Hayden JA, van der Windt DA, Cartwright JL, et al. Assessing bias in studies of prognostic factors. *Ann Intern Med* 2013;158(4):280-6. doi: 10.7326/0003-4819-158-4-201302190-00009 [published Online First: 2013/02/20]
17. Eggener SE, Rumble RB, Armstrong AJ, et al. Molecular Biomarkers in Localized Prostate Cancer: ASCO Guideline. *J Clin Oncol* 2020;38(13):1474-94. doi: 10.1200/jco.19.02768 [published Online First: 2019/12/13]
18. Moons KGM, Wolff RF, Riley RD, et al. PROBAST: A Tool to Assess Risk of Bias and Applicability of Prediction Model Studies: Explanation and Elaboration. *Ann Intern Med* 2019;170(1):W1-w33. doi: 10.7326/m18-1377 [published Online First: 2019/01/01]
19. Riley RD, Moons KGM, Snell KIE, et al. A guide to systematic review and meta-analysis of prognostic factor studies. *Bmj* 2019;364:k4597. doi: 10.1136/bmj.k4597 [published Online First: 2019/02/01]
20. Grooten WJA, Tseli E, Ång BO, et al. Elaborating on the assessment of the risk of bias in prognostic studies in pain rehabilitation using QUIPS—aspects of interrater agreement. *Diagnostic and Prognostic Research* 2019;3(1):5. doi: 10.1186/s41512-019-0050-0
21. Hagiwara K, Tobisawa Y, Kaya T, et al. Wisteria floribunda Agglutinin and Its Reactive-Glycan-Carrying Prostate-Specific Antigen as a Novel Diagnostic and Prognostic Marker of Prostate Cancer. *Int J Mol Sci* 2017;18(2) doi: 10.3390/ijms18020261 [published Online First: 2017/01/31]
22. Kelly BD, Miller N, Sweeney KJ, et al. A Circulating MicroRNA Signature as a Biomarker for Prostate Cancer in a High Risk Group. *J Clin Med* 2015;4(7):1369-79. doi: 10.3390/jcm4071369 [published Online First: 2015/08/05]
23. Guinney J, Wang T, Laajala TD, et al. Prediction of overall survival for patients with metastatic castration-resistant prostate cancer: development of a prognostic model through a crowdsourced challenge with open clinical trial data. *The Lancet Oncology* 2017;18(1):132-42. doi: 10.1016/s1470-2045(16)30560-5 [published Online First: 2016/11/20]
24. Joniau S, Spahn M, Briganti A, et al. Pretreatment tables predicting pathologic stage of locally advanced prostate cancer. *Eur Urol* 2015;67(2):319-25. doi: 10.1016/j.eururo.2014.03.013 [published Online First: 2014/04/02]
25. Palsdottir T, Nordström T, Aly M, et al. A Unified Prostate Cancer Risk Prediction Model Combining the Stockholm3 Test and Magnetic Resonance Imaging. *Eur Urol Oncol* 2019;2(5):490-96. doi: 10.1016/j.euo.2018.09.008 [published Online First: 2019/08/15]
26. Aguilera A, Bañuelos B, Díez J, et al. Biochemical recurrence risk factors in surgically treated high and very high-risk prostate tumors. *Cent European J Urol* 2015;68(3):302-7. doi: 10.5173/ceju.2015.485 [published Online First: 2015/11/17]
27. Bramhecha YM, Rouzbeh S, Guérard K-P, et al. The combination of PTEN deletion and 16p13.3 gain in prostate cancer provides additional prognostic information in patients treated with radical prostatectomy. *Modern Pathology* 2019;32(1):128-38. doi: 10.1038/s41379-018-0107-6
28. Alvim RG, Audenet F, Vertosick EA, et al. Performance Prediction for Surgical Outcomes in Partial Nephrectomy Using Nephrometry Scores: A Comparison of Arterial Based Complexity (ABC), RENAL, and PADUA Systems. *Eur Urol Oncol* 2018;1(5):428-34. doi: 10.1016/j.euo.2018.05.004 [published Online First: 2019/06/04]
29. Bruce HM, Stricker PD, Gupta R, et al. Loss of AZGP1 as a Superior Predictor of Relapse in Margin-Positive Localized Prostate Cancer. *Prostate* 2016;76(16):1491-500. doi: 10.1002/pros.23233 [published Online First: 2016/10/19]
30. Francini E, Gray KP, Xie W, et al. Time of metastatic disease presentation and volume of disease are prognostic for metastatic hormone sensitive prostate cancer (mHSPC). *The Prostate* 2018;78(12):889-95. doi: <https://doi.org/10.1002/pros.23645>
31. Hamada R, Nakashima J, Ohori M, et al. Preoperative predictive factors and further risk stratification of biochemical recurrence in clinically localized high-risk prostate cancer.

- 1  
2  
3  
4  
5  
6  
7  
8  
9  
10  
11  
12  
13  
14  
15  
16  
17  
18  
19  
20  
21  
22  
23  
24  
25  
26  
27  
28  
29  
30  
31  
32  
33  
34  
35  
36  
37  
38  
39  
40  
41  
42  
43  
44  
45  
46  
47  
48  
49  
50  
51  
52  
53  
54  
55  
56  
57  
58  
59  
60
- International journal of clinical oncology* 2016;21(3):595-600. doi: 10.1007/s10147-015-0923-3
32. Hashimoto T, Nakashima J, Inoue R, et al. The significance of micro-lymphatic invasion and pathological Gleason score in prostate cancer patients with pathologically organ-confined disease and negative surgical margins after robot-assisted radical prostatectomy. *International journal of clinical oncology* 2020;25(2):377-83. doi: 10.1007/s10147-019-01561-4
33. Kato M, Kimura K, Hirakawa A, et al. Prognostic parameter for high risk prostate cancer patients at initial presentation. *Prostate* 2018;78(1):11-16. doi: 10.1002/pros.23438 [published Online First: 2017/11/03]
34. Kluth LA, Xylinas E, Rieken M, et al. Does increasing the nodal yield improve outcomes in contemporary patients without nodal metastasis undergoing radical prostatectomy? *Urologic oncology* 2014;32(1):47.e1-8. doi: 10.1016/j.urolonc.2013.06.013 [published Online First: 2013/09/24]
35. Lara PN, Jr., Ely B, Quinn DI, et al. Serum biomarkers of bone metabolism in castration-resistant prostate cancer patients with skeletal metastases: results from SWOG 0421. *J Natl Cancer Inst* 2014;106(4):dju013. doi: 10.1093/jnci/dju013 [published Online First: 2014/02/26]
36. Lee S, Kim KB, Jo JK, et al. Prognostic Value of Focal Positive Surgical Margins After Radical Prostatectomy. *Clinical Genitourinary Cancer* 2016;14(4):e313-e19. doi: <https://doi.org/10.1016/j.clgc.2015.12.013>
37. Lévesque E, Caron P, Lacombe L, et al. A Comprehensive Analysis of Steroid Hormones and Progression of Localized High-Risk Prostate Cancer. *Cancer Epidemiol Biomarkers Prev* 2019;28(4):701-06. doi: 10.1158/1055-9965.Epi-18-1002 [published Online First: 2019/02/09]
38. Lin YL, Li YL, Ma JG. Aberrant Promoter Methylation of Protocadherin8 (PCDH8) in Serum is a Potential Prognostic Marker for Low Gleason Score Prostate Cancer. *Med Sci Monit* 2017;23:4895-900. doi: 10.12659/msm.904366 [published Online First: 2017/10/14]
39. Löffeler S, Weedon-Fekjaer H, Wang-Hansen MS, et al. "Natural course" of disease in patients with metastatic castrate-resistant prostate cancer: Survival and prognostic factors without life-prolonging treatment. *Scand J Urol* 2015;49(6):440-45. doi: 10.3109/21681805.2015.1059881 [published Online First: 2015/07/04]
40. Narang AK, Trieu J, Radwan N, et al. End-of-radiation PSA as a novel prognostic factor in patients undergoing definitive radiation and androgen deprivation therapy for prostate cancer. *Prostate Cancer Prostatic Dis* 2017;20(2):203-09. doi: 10.1038/pcan.2016.67 [published Online First: 2017/01/18]
41. Ozden C, Aktas BK, Bulut S, et al. Effect of age on biochemical recurrence after radical prostatectomy. *Kaohsiung J Med Sci* 2017;33(2):91-95. doi: 10.1016/j.kjms.2016.11.002 [published Online First: 2017/02/01]
42. Pei XQ, He DL, Tian G, et al. Prognostic factors of first-line docetaxel treatment in castration-resistant prostate cancer: roles of neutrophil-to-lymphocyte ratio in patients from Northwestern China. *International urology and nephrology* 2017;49(4):629-35. doi: 10.1007/s11255-017-1524-z [published Online First: 2017/02/06]
43. Qu Y, Zhang C, Du E, et al. Pim-3 is a Critical Risk Factor in Development and Prognosis of Prostate Cancer. *Med Sci Monit* 2016;22:4254-60. doi: 10.12659/msm.898223 [published Online First: 2016/11/09]
44. Qu F, Xie W, Nakabayashi M, et al. Association of AR-V7 and Prostate-Specific Antigen RNA Levels in Blood with Efficacy of Abiraterone Acetate and Enzalutamide Treatment in Men with Prostate Cancer. *Clin Cancer Res* 2017;23(3):726-34. doi: 10.1158/1078-0432.Ccr-16-1070 [published Online First: 2016/08/05]



- 1
- 2
- 3
- 4 45. Rüenauer K, Menon R, Svensson MA, et al. Prognostic significance of YWHAZ expression in
- 5 localized prostate cancer. *Prostate Cancer Prostatic Dis* 2014;17(4):310-4. doi:
- 6 10.1038/pcan.2014.32 [published Online First: 2014/08/27]
- 7
- 8 46. Shimodaira K, Nakashima J, Nakagami Y, et al. Prognostic Value of Platelet Counts in Patients
- 9 with Metastatic Prostate Cancer Treated with Endocrine Therapy. *Urol J* 2020;17(1):42-49.
- 10 doi: 10.22037/uj.v0i0.4735 [published Online First: 2019/03/19]
- 11
- 12 47. Strand SH, Hoyer S, Lynnerup AS, et al. High levels of 5-hydroxymethylcytosine (5hmC) is an
- 13 adverse predictor of biochemical recurrence after prostatectomy in ERG-negative prostate
- 14 cancer. *Clin Epigenetics* 2015;7:111. doi: 10.1186/s13148-015-0146-5 [published Online
- 15 First: 2015/10/20]
- 16
- 17 48. Takagi M, Demizu Y, Terashima K, et al. Long-term outcomes in patients treated with proton
- 18 therapy for localized prostate cancer. *Cancer Med* 2017;6(10):2234-43. doi:
- 19 10.1002/cam4.1159 [published Online First: 2017/09/08]
- 20
- 21 49. Wang Y, Xu F, Pan J, et al. Platelet to lymphocyte ratio as an independent prognostic indicator for
- 22 prostate cancer patients receiving androgen deprivation therapy. *BMC Cancer* 2016;16:329.
- 23 doi: 10.1186/s12885-016-2363-5 [published Online First: 2016/05/26]
- 24
- 25 50. Zacho HD, Gade M, Mortensen JC, et al. Bone Scan Index Is an Independent Predictor of Time to
- 26 Castration-resistant Prostate Cancer in Newly Diagnosed Prostate Cancer: A Prospective
- 27 Study. *Urology* 2017;108:135-41. doi: 10.1016/j.urology.2017.05.058 [published Online First:
- 28 2017/08/02]
- 29
- 30 51. Berg KD, Vainer B, Thomsen FB, et al. ERG protein expression in diagnostic specimens is
- 31 associated with increased risk of progression during active surveillance for prostate cancer.
- 32 *Eur Urol* 2014;66(5):851-60. doi: 10.1016/j.eururo.2014.02.058 [published Online First:
- 33 2014/03/19]
- 34
- 35 52. Palsdottir T, Nordström T, Aly M, et al. A Unified Prostate Cancer Risk Prediction Model
- 36 Combining the Stockholm3 Test and Magnetic Resonance Imaging. *European Urology*
- 37 *Oncology* 2019;2(5):490-96. doi: <https://doi.org/10.1016/j.euo.2018.09.008>
- 38
- 39 53. Guinney J, Wang T, Laajala TD, et al. Prediction of overall survival for patients with metastatic
- 40 castration-resistant prostate cancer: development of a prognostic model through a
- 41 crowdsourced challenge with open clinical trial data. *The Lancet Oncology* 2017;18(1):132-
- 42 42. doi: [https://doi.org/10.1016/S1470-2045\(16\)30560-5](https://doi.org/10.1016/S1470-2045(16)30560-5)
- 43
- 44 54. Lazzeri M, Haese A, de la Taille A, et al. Serum isoform [-2]proPSA derivatives significantly
- 45 improve prediction of prostate cancer at initial biopsy in a total PSA range of 2-10 ng/ml: a
- 46 multicentric European study. *Eur Urol* 2013;63(6):986-94. doi: 10.1016/j.eururo.2013.01.011
- 47 [published Online First: 2013/02/05]
- 48
- 49 55. Aladwani M, Lophatananon A, Ollier W, et al. Prediction models for prostate cancer to be used in
- 50 the primary care setting: a systematic review. *BMJ Open* 2020;10(7):e034661. doi:
- 51 10.1136/bmjopen-2019-034661 [published Online First: 2020/07/22]
- 52
- 53 56. Tian S, Lei Z, Gong Z, et al. Clinical implication of prognostic and predictive biomarkers for
- 54 castration-resistant prostate cancer: a systematic review. *Cancer Cell Int* 2020;20(1):409. doi:
- 55 10.1186/s12935-020-01508-0
- 56
- 57 57. Harrison H, Thompson RE, Lin Z, et al. Risk Prediction Models for Kidney Cancer: A Systematic
- 58 Review. *European urology focus* 2020 doi: <https://doi.org/10.1016/j.euf.2020.06.024>
- 59
- 60 58. Schmitz-Dräger BJ, Droller M, Lokeshwar VB, et al. Molecular markers for bladder cancer
- screening, early diagnosis, and surveillance: the WHO/ICUD consensus. *Urologia*
- internationalis* 2015;94(1):1-24. doi: 10.1159/000369357 [published Online First:
- 2014/12/17]
- 59
- 60 59. Epstein JI, Egevad L, Amin MB, et al. The 2014 International Society of Urological Pathology
- (ISUP) Consensus Conference on Gleason Grading of Prostatic Carcinoma: Definition of
- Grading Patterns and Proposal for a New Grading System. *The American journal of surgical*

1  
2  
3 *pathology* 2016;40(2):244-52. doi: 10.1097/pas.0000000000000530 [published Online First:  
4 2015/10/23]

- 5 60. Hung SC, Yang CK, Cheng CL, et al. Long-term Oncologic Outcomes of Robotic-assisted Radical  
6 Prostatectomy by a Single Surgeon. *Anticancer Res* 2017;37(8):4157-64. doi:  
7 10.21873/anticanres.11803 [published Online First: 2017/07/26]  
8  
9  
10  
11  
12  
13  
14  
15  
16  
17  
18  
19  
20  
21  
22  
23  
24  
25  
26  
27  
28  
29  
30  
31  
32  
33  
34  
35  
36  
37  
38  
39  
40  
41  
42  
43  
44  
45  
46  
47  
48  
49  
50  
51  
52  
53  
54  
55  
56  
57  
58  
59  
60

For peer review only

1  
2  
3  
4  
5  
6  
7  
8  
9  
10  
11  
12  
13  
14  
15  
16  
17  
18  
19  
20  
21  
22  
23  
24  
25  
26  
27  
28  
29  
30  
31  
32  
33  
34  
35  
36  
37  
38  
39  
40  
41  
42  
43  
44  
45  
46  
47  
48  
49  
50  
51  
52  
53  
54  
55  
56  
57  
58  
59  
60

**Figure 1:** Overview of four stage process

**Figure 2:** PRISMA flow diagram

For peer review only



**Figure 1:** Overview of four stage process

| Workflow   | Task                                                                                                                                                                                                                                                                                                                                                                                                                                                                                                                                                                                                                                                                                                                                                                                                                                                                                                                                                                                                          |
|------------|---------------------------------------------------------------------------------------------------------------------------------------------------------------------------------------------------------------------------------------------------------------------------------------------------------------------------------------------------------------------------------------------------------------------------------------------------------------------------------------------------------------------------------------------------------------------------------------------------------------------------------------------------------------------------------------------------------------------------------------------------------------------------------------------------------------------------------------------------------------------------------------------------------------------------------------------------------------------------------------------------------------|
| Stage 1.   | <p>Broad literature-based systematic review of diagnostic and prognostic factors (DPs) for all stages of prostate cancer from 2014 onwards (English only; humans).</p> <ul style="list-style-type: none"> <li>Extract data from the included studies following the CHARMS-PF guideline.</li> </ul>                                                                                                                                                                                                                                                                                                                                                                                                                                                                                                                                                                                                                                                                                                            |
| Stage 2.   | <p>Discussion of systematic review findings by a multidisciplinary expert panel</p> <ul style="list-style-type: none"> <li>Review the list of included studies</li> </ul>                                                                                                                                                                                                                                                                                                                                                                                                                                                                                                                                                                                                                                                                                                                                                                                                                                     |
| Stage 3.   | <p>Risk of Bias Assessment and applicability of individual studies using PROBAST, QUIPS and QUADAS-2</p>                                                                                                                                                                                                                                                                                                                                                                                                                                                                                                                                                                                                                                                                                                                                                                                                                                                                                                      |
| Stage 4.   | <p>Quantitative assessment of individual articles using meta-analytic techniques:</p> <ul style="list-style-type: none"> <li>If PROBAST indicates low risk of bias and low concerns for applicability: Oxford Classification Centre for Evidence Based Medicine: <ol style="list-style-type: none"> <li>If there is Level 1a (SR of RCTs), we do not do a meta-analysis</li> <li>No Level 1a but &gt;2 RCTs, we do a meta-analysis</li> <li>No Level 1a/b, i.e. if at least two RCTs are now available, and systematic review of RCT evidence is not possible, we will identify whether there is a systematic review for observational studies (real world evidence; RWE), we do not do a meta-analysis</li> <li>If systematic review of RWE is not available, a systematic review of observational study will be conducted, and a meta-analysis will be performed if at least two RWEs studies are available and data pooling is feasible and there are low concerns of risk of bias.</li> </ol> </li> </ul> |
| Final aim: | Develop online PIONEER Online Search Tool for DPFs                                                                                                                                                                                                                                                                                                                                                                                                                                                                                                                                                                                                                                                                                                                                                                                                                                                                                                                                                            |

Figure 2: PRISMA flow diagram



1  
2  
3  
4  
5  
6  
7  
8  
9  
10  
11  
12  
13  
14  
15  
16  
17  
18  
19  
20  
21  
22  
23  
24  
25  
26  
27  
28  
29  
30  
31  
32  
33  
34  
35  
36  
37  
38  
39  
40  
41  
42  
43  
44  
45  
46  
47  
48  
49  
50  
51  
52  
53  
54  
55  
56  
57  
58  
59  
60

**Supplementary material Table 1: Search strategy**

Database: OVID Medline Epub Ahead of Print, In-Process & Other Non-Indexed Citations, Ovid MEDLINE(R) Daily and Ovid MEDLINE(R) 1946 to Present, Embase <1974 to 2020 January 28>, EBM Reviews - Cochrane Database of Systematic Reviews <2005 to January 21, 2020>

Search Strategy:

- 
- 1 exp \*Prostatic Neoplasms/ (262435)
  - 2 exp \*prostate cancer/ (245472)
  - 3 (prostat\* adj2 (cancer\* or carcinoma\* or malignan\* or tumor\* or tumour\* or neoplas\* or adenocarcinoma\* or adenoma\*)).tw. (332251)
  - 4 or/1-3 (366427)
  - 5 ((diagnostic or prognos\* or predict\*) adj10 (biomarker or biomarkers or factor or factors)).tw,kw. (717487)
  - 6 ((diagnostic or prognos\* or predict\*) adj10 (Oncotype Dx Prostate or Prolaris or Decipher or Decipher PORTOS or ProMark)).tw,kw. (458)
  - 7 5 or 6 (717869)
  - 8 4 and 7 (17456)
  - 9 limit 8 to english language [Limit not valid in CDSR; records were retained] (16484)
  - 10 limit 9 to yr="2014 -Current" (8417)
  - 11 conference abstract.pt. or Congresses as Topic/ or Conference Review.pt. or "Journal: Conference Abstract".pt. (3815712)
  - 12 10 not 11 (5902)
  - 13 (exp animals/ or exp animal/ or exp nonhuman/ or exp animal experiment/ or animal model/ or animal tissue/ or non human/ or (rat or rats or mice or mouse or swine or porcine or murine or sheep or lambs or pigs or piglets or rabbit or rabbits or cat or cats or dog or dogs or cattle or bovine or monkey or monkeys or trout or marmoset\$1).ti.) not (humans/ or human/ or human experiment/ or (human\* or men or women or patients or subjects).tw.) (10251935)
  - 14 12 not 13 (5882)
  - 15 note/ or editorial/ or letter/ or Comment/ or news/ or (note or editorial or letter or Comment or news).pt. (4565255)
  - 16 14 not 15 (5811)
  - 17 (child/ or Pediatrics/ or Adolescent/ or Infant/ or adolescence/ or newborn/ or (baby or babies or child or children or pediatric\* or paediatric\* or peadiatric\* or infant\* or infancy or neonat\* or

newborn\* or new born\* or adolescen\* or preschool or pre-school or toddler\*).tw.) not (adult/ or aged/ or (aged or adult\* or elder\* or senior\* or men or women).tw.) (4146377)

18 16 not 17 (5794)

19 18 use ppez,oemez (5788)

20 10 use coch (6)

21 19 or 20 (5794)

22 remove duplicates from 21 (3140)

For peer review only

Supplementary material Table 2. Multidisciplinary expert meeting

| <b>Profession</b>                    | <b>Attendance</b> |
|--------------------------------------|-------------------|
| Urologist                            | Accepted          |
| Epidemiologist                       | Accepted          |
| Urologist                            | Accepted          |
| Epidemiologist/Pharma representative | Accepted          |
| Pathologist                          | Accepted          |
| Urologist                            | Accepted          |
| Urologist                            | Accepted          |
| Epidemiologist                       | Accepted          |
| Methodologist                        | Accepted          |
| Epidemiologist/Pharma representative | Accepted          |
| Urologist                            | Accepted          |
| Urologist/Methodologist              | Accepted          |
| Urologist                            | Accepted          |
| Urologist                            | Accepted          |
| Oncologist                           | Accepted          |
| Pharma representative                | Accepted          |
| Pharma representative                | Accepted          |
| Statistician/ Pharma representative  | Accepted          |

Table 3: PROBAST overall assessment

| Criteria                                                  | Reaching and overall judgement of RoB                       |                                                                                     |
|-----------------------------------------------------------|-------------------------------------------------------------|-------------------------------------------------------------------------------------|
| All domains are rated low risk.                           | Paper was classified as low RoB and low Applicability.      |  |
| One or more domain was judged to be high risk of bias.    | Paper was classified as high RoB and high Applicability.    |  |
| One or more domain was judged to be unclear risk of bias. | Paper was classified as unclear RoB and high Applicability. |  |

For peer review only

Supplementary material Table 4: QUIPS scoring

| Score of 6 domains                                                                | Overall RoB                                 |        |
|-----------------------------------------------------------------------------------|---------------------------------------------|--------|
| All domains were classified as having low RoB, or up to one moderate RoB.         | Paper was classified as low RoB             | Green  |
| One or more domains were classified as having high RoB, or $\geq 3$ moderate RoB. | Paper was classified as high RoB            | Red    |
| All papers in between.                                                            | Paper was classified as having moderate RoB | Yellow |

For peer review only

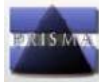

## PRISMA 2020 Checklist

| Section and Topic             | Item # | Checklist item                                                                                                                                                                                                                                                                                       | Location where item is reported |
|-------------------------------|--------|------------------------------------------------------------------------------------------------------------------------------------------------------------------------------------------------------------------------------------------------------------------------------------------------------|---------------------------------|
| <b>TITLE</b>                  |        |                                                                                                                                                                                                                                                                                                      |                                 |
| Title                         | 1      | Identify the report as a systematic review.                                                                                                                                                                                                                                                          | p1                              |
| <b>ABSTRACT</b>               |        |                                                                                                                                                                                                                                                                                                      |                                 |
| Abstract                      | 2      | See the PRISMA 2020 for Abstracts checklist.                                                                                                                                                                                                                                                         | P2                              |
| <b>INTRODUCTION</b>           |        |                                                                                                                                                                                                                                                                                                      |                                 |
| Rationale                     | 3      | Describe the rationale for the review in the context of existing knowledge.                                                                                                                                                                                                                          | P3                              |
| Objectives                    | 4      | Provide an explicit statement of the objective(s) or question(s) the review addresses.                                                                                                                                                                                                               | P4                              |
| <b>METHODS</b>                |        |                                                                                                                                                                                                                                                                                                      |                                 |
| Eligibility criteria          | 5      | Specify the inclusion and exclusion criteria for the review and how studies were grouped for the syntheses.                                                                                                                                                                                          | P5                              |
| Information sources           | 6      | Specify all databases, registers, websites, organisations, reference lists and other sources searched or consulted to identify studies. Specify the date when each source was last searched or consulted.                                                                                            | P5                              |
| Search strategy               | 7      | Present the full search strategies for all databases, registers and websites, including any filters and limits used.                                                                                                                                                                                 | P5                              |
| Selection process             | 8      | Specify the methods used to decide whether a study met the inclusion criteria of the review, including how many reviewers screened each record and each report retrieved, whether they worked independently, and if applicable, details of automation tools used in the process.                     | P5                              |
| Data collection process       | 9      | Specify the methods used to collect data from reports, including how many reviewers collected data from each report, whether they worked independently, any processes for obtaining or confirming data from study investigators, and if applicable, details of automation tools used in the process. | P5                              |
| Data items                    | 10a    | List and define all outcomes for which data were sought. Specify whether all results that were compatible with each outcome domain in each study were sought (e.g. for all measures, time points, analyses), and if not, the methods used to decide which results to collect.                        | P5                              |
|                               | 10b    | List and define all other variables for which data were sought (e.g. participant and intervention characteristics, funding sources). Describe any assumptions made about any missing or unclear information.                                                                                         | P5                              |
| Study risk of bias assessment | 11     | Specify the methods used to assess risk of bias in the included studies, including details of the tool(s) used, how many reviewers assessed each study and whether they worked independently, and if applicable, details of automation tools used in the process.                                    | P5                              |
| Effect measures               | 12     | Specify for each outcome the effect measure(s) (e.g. risk ratio, mean difference) used in the synthesis or presentation of results.                                                                                                                                                                  | n/a                             |
| Synthesis methods             | 13a    | Describe the processes used to decide which studies were eligible for each synthesis (e.g. tabulating the study intervention characteristics and comparing against the planned groups for each synthesis (item #5)).                                                                                 | P5                              |
|                               | 13b    | Describe any methods required to prepare the data for presentation or synthesis, such as handling of missing summary statistics, or data conversions.                                                                                                                                                | P5                              |
|                               | 13c    | Describe any methods used to tabulate or visually display results of individual studies and syntheses.                                                                                                                                                                                               | P5                              |
|                               | 13d    | Describe any methods used to synthesize results and provide a rationale for the choice(s). If meta-analysis was performed, describe the model(s), method(s) to identify the presence and extent of statistical heterogeneity, and software package(s) used.                                          | P5                              |
|                               | 13e    | Describe any methods used to explore possible causes of heterogeneity among study results (e.g. subgroup analysis, meta-regression).                                                                                                                                                                 | P5                              |
|                               | 13f    | Describe any sensitivity analyses conducted to assess robustness of the synthesized results.                                                                                                                                                                                                         | P5                              |
| Reporting bias assessment     | 14     | Describe any methods used to assess risk of bias due to missing results in a synthesis (arising from reporting biases).                                                                                                                                                                              | P6-8                            |
| Certainty                     | 15     | Describe any methods used to assess certainty (or confidence) in the body of evidence for an outcome.                                                                                                                                                                                                | n/a                             |





## PRISMA 2020 Checklist

| Section and Topic              | Item # | Checklist item                                                                                                                                                                                                                                                                                                                                           | Location where item is reported |
|--------------------------------|--------|----------------------------------------------------------------------------------------------------------------------------------------------------------------------------------------------------------------------------------------------------------------------------------------------------------------------------------------------------------|---------------------------------|
| assessment                     |        |                                                                                                                                                                                                                                                                                                                                                          |                                 |
| <b>RESULTS</b>                 |        |                                                                                                                                                                                                                                                                                                                                                          |                                 |
| Study selection                | 16a    | Describe the results of the search and selection process, from the number of records identified in the search to the number of studies included in the review, ideally using a flow diagram.                                                                                                                                                             | P6-11                           |
|                                | 16b    | Cite studies that might appear to meet the inclusion criteria, but which were excluded, and explain why they were excluded.                                                                                                                                                                                                                              | P6-11                           |
| Study characteristics          | 17     | Cite each included study and present its characteristics.                                                                                                                                                                                                                                                                                                | P6-11                           |
| Risk of bias in studies        | 18     | Present assessments of risk of bias for each included study.                                                                                                                                                                                                                                                                                             | P6-11                           |
| Results of individual studies  | 19     | For all outcomes, present, for each study: (a) summary statistics for each group (where appropriate) and (b) an effect estimate and its precision (e.g. confidence/credible interval), ideally using structured tables or plots.                                                                                                                         | P6-11                           |
| Results of syntheses           | 20a    | For each synthesis, briefly summarise the characteristics and risk of bias among contributing studies.                                                                                                                                                                                                                                                   | P6-11                           |
|                                | 20b    | Present results of all statistical syntheses conducted. If meta-analysis was done, present for each the summary estimate and its precision (e.g. confidence/credible interval) and measures of statistical heterogeneity. If comparing groups, describe the direction of the effect.                                                                     | /                               |
|                                | 20c    | Present results of all investigations of possible causes of heterogeneity among study results.                                                                                                                                                                                                                                                           | /                               |
|                                | 20d    | Present results of all sensitivity analyses conducted to assess the robustness of the synthesized results.                                                                                                                                                                                                                                               | /                               |
| Reporting biases               | 21     | Present assessments of risk of bias due to missing results (arising from reporting biases) for each synthesis assessed.                                                                                                                                                                                                                                  | /                               |
| Certainty of evidence          | 22     | Present assessments of certainty (or confidence) in the body of evidence for each outcome assessed.                                                                                                                                                                                                                                                      | /                               |
| <b>DISCUSSION</b>              |        |                                                                                                                                                                                                                                                                                                                                                          |                                 |
| Discussion                     | 23a    | Provide a general interpretation of the results in the context of other evidence.                                                                                                                                                                                                                                                                        | P12                             |
|                                | 23b    | Discuss any limitations of the evidence included in the review.                                                                                                                                                                                                                                                                                          | P15                             |
|                                | 23c    | Discuss any limitations of the review processes used.                                                                                                                                                                                                                                                                                                    | P15                             |
|                                | 23d    | Discuss implications of the results for practice, policy, and future research.                                                                                                                                                                                                                                                                           | P13-14                          |
| <b>OTHER INFORMATION</b>       |        |                                                                                                                                                                                                                                                                                                                                                          |                                 |
| Registration and protocol      | 24a    | Provide registration information for the review, including register name and registration number, or state that the review was not registered.                                                                                                                                                                                                           | Published with BMJ open         |
|                                | 24b    | Indicate where the review protocol can be accessed, or state that a protocol was not prepared.                                                                                                                                                                                                                                                           | /                               |
|                                | 24c    | Describe and explain any amendments to information provided at registration or in the protocol.                                                                                                                                                                                                                                                          | /                               |
| Support                        | 25     | Describe sources of financial or non-financial support for the review, and the role of the funders or sponsors in the review.                                                                                                                                                                                                                            | End of the manuscript           |
| Competing interests            | 26     | Declare any competing interests of review authors.                                                                                                                                                                                                                                                                                                       | In submission                   |
| Availability of data, code and | 27     | Report which of the following are publicly available and where they can be found: template data collection forms; data extracted from included studies; data used for all analyses; analytic code; any other materials used in the review. <a href="https://www.bmj.com/submitting-guidelines.xhtml">https://www.bmj.com/submitting-guidelines.xhtml</a> | Methods                         |



# PRISMA 2020 Checklist

1  
2  
3  
4  
5  
6  
7  
8  
9  
10  
11  
12  
13  
14  
15  
16  
17  
18  
19  
20  
21  
22  
23  
24  
25  
26  
27  
28  
29  
30  
31  
32  
33  
34  
35  
36  
37  
38  
39  
40  
41  
42  
43  
44  
45  
46  
47

| Section and Topic | Item # | Checklist item | Location where item is reported |
|-------------------|--------|----------------|---------------------------------|
| other materials   |        |                |                                 |

From: Page MJ, McKenzie JE, Bossuyt PM, Boutron I, Hoffmann TC, Mulrow CD, et al. The PRISMA 2020 statement: an updated guideline for reporting systematic reviews. *BMJ* 2021;372:n71. doi: 10.1136/bmj.n71  
 For more information, visit: <http://www.prisma-statement.org/>

For peer review only
