# Supplementary material for: Diagnostic and prognostic factors in patients with prostate cancer: a systematic review
Source: PubMed Central journal article supplement — BMJ Open. 2022 Apr 3;12(4):e058267. doi: 10.1136/bmjopen-2021-058267 (PMC8981333; doi:10.1136/bmjopen-2021-058267), 2022-04-03
Supplement: bmjopen-2021-058267supp002.pdf [file bmjopen-2021-058267supp002.pdf]

**Supplementary material Table 1: Search strategy**

Database: OVID Medline Epub Ahead of Print, In-Process & Other Non-Indexed Citations, Ovid MEDLINE(R) Daily and Ovid MEDLINE(R) 1946 to Present, Embase <1974 to 2020 January 28>, EBM Reviews - Cochrane Database of Systematic Reviews <2005 to January 21, 2020>

## Search Strategy:

- 
- 1 exp \*Prostatic Neoplasms/ (262435)
  - 2 exp \*prostate cancer/ (245472)
  - 3 (prostat\* adj2 (cancer\* or carcinoma\* or malignan\* or tumor\* or tumour\* or neoplas\* or adenocarcinoma\* or adenoma\*)).tw. (332251)
  - 4 or/1-3 (366427)
  - 5 ((diagnostic or prognos\* or predict\*) adj10 (biomarker or biomarkers or factor or factors)).tw,kw. (717487)
  - 6 ((diagnostic or prognos\* or predict\*) adj10 (Oncotype Dx Prostate or Prolaris or Decipher or Decipher PORTOS or ProMark)).tw,kw. (458)
  - 7 5 or 6 (717869)
  - 8 4 and 7 (17456)
  - 9 limit 8 to english language [Limit not valid in CDSR; records were retained] (16484)
  - 10 limit 9 to yr="2014 -Current" (8417)
  - 11 conference abstract.pt. or Congresses as Topic/ or Conference Review.pt. or "Journal: Conference Abstract".pt. (3815712)
  - 12 10 not 11 (5902)
  - 13 (exp animals/ or exp animal/ or exp nonhuman/ or exp animal experiment/ or animal model/ or animal tissue/ or non human/ or (rat or rats or mice or mouse or swine or porcine or murine or sheep or lambs or pigs or piglets or rabbit or rabbits or cat or cats or dog or dogs or cattle or bovine or monkey or monkeys or trout or marmoset\$1).ti.) not (humans/ or human/ or human experiment/ or (human\* or men or women or patients or subjects).tw.) (10251935)
  - 14 12 not 13 (5882)
  - 15 note/ or editorial/ or letter/ or Comment/ or news/ or (note or editorial or letter or Comment or news).pt. (4565255)
  - 16 14 not 15 (5811)
  - 17 (child/ or Pediatrics/ or Adolescent/ or Infant/ or adolescence/ or newborn/ or (baby or babies or child or children or pediatric\* or paediatric\* or peadiatric\* or infant\* or infancy or neonat\* or

newborn\* or new born\* or adolescen\* or preschool or pre-school or toddler\*).tw.) not (adult/ or aged/ or (aged or adult\* or elder\* or senior\* or men or women).tw.) (4146377)

18 16 not 17 (5794)

19 18 use ppez,oemez (5788)

20 10 use coch (6)

21 19 or 20 (5794)

22 remove duplicates from 21 (3140)
