# Supplementary material for: Diagnostic and prognostic factors in patients with prostate cancer: a systematic review
Source: PubMed Central journal article supplement — BMJ Open. 2022 Apr 3;12(4):e058267. doi: 10.1136/bmjopen-2021-058267 (PMC8981333; doi:10.1136/bmjopen-2021-058267), 2022-04-03
Supplement: bmjopen-2021-058267supp003.pdf [file bmjopen-2021-058267supp003.pdf]

Supplementary material Table 2. Multidisciplinary expert meeting

| <b>Profession</b>                    | <b>Attendance</b> |
|--------------------------------------|-------------------|
| Urologist                            | Accepted          |
| Epidemiologist                       | Accepted          |
| Urologist                            | Accepted          |
| Epidemiologist/Pharma representative | Accepted          |
| Pathologist                          | Accepted          |
| Urologist                            | Accepted          |
| Urologist                            | Accepted          |
| Epidemiologist                       | Accepted          |
| Methodologist                        | Accepted          |
| Epidemiologist/Pharma representative | Accepted          |
| Urologist                            | Accepted          |
| Urologist/Methodologist              | Accepted          |
| Urologist                            | Accepted          |
| Urologist                            | Accepted          |
| Oncologist                           | Accepted          |
| Pharma representative                | Accepted          |
| Pharma representative                | Accepted          |
| Statistician/ Pharma representative  | Accepted          |
