# Supplementary material for: Diagnostic and prognostic factors in patients with prostate cancer: a systematic review
Source: PubMed Central journal article supplement — BMJ Open. 2022 Apr 3;12(4):e058267. doi: 10.1136/bmjopen-2021-058267 (PMC8981333; doi:10.1136/bmjopen-2021-058267), 2022-04-03
Supplement: bmjopen-2021-058267supp004.pdf [file bmjopen-2021-058267supp004.pdf]

Table 3: PROBAST overall assessment

| Criteria                                                  | Reaching and overall judgement of RoB                       |        |
|-----------------------------------------------------------|-------------------------------------------------------------|--------|
| All domains are rated low risk.                           | Paper was classified as low RoB and low Applicability.      | Green  |
| One or more domain was judged to be high risk of bias.    | Paper was classified as high RoB and high Applicability.    | Red    |
| One or more domain was judged to be unclear risk of bias. | Paper was classified as unclear RoB and high Applicability. | Yellow |
