# Supplementary material for: Diagnostic and prognostic factors in patients with prostate cancer: a systematic review
Source: PubMed Central journal article supplement — BMJ Open. 2022 Apr 3;12(4):e058267. doi: 10.1136/bmjopen-2021-058267 (PMC8981333; doi:10.1136/bmjopen-2021-058267), 2022-04-03
Supplement: bmjopen-2021-058267supp005.pdf [file bmjopen-2021-058267supp005.pdf]

Supplementary material Table 4: QUIPS scoring

| <b>Score of 6 domains</b>                                                         | <b>Overall RoB</b>                          |                                                                                     |
|-----------------------------------------------------------------------------------|---------------------------------------------|-------------------------------------------------------------------------------------|
| All domains were classified as having low RoB, or up to one moderate RoB.         | Paper was classified as low RoB             |  |
| One or more domains were classified as having high RoB, or $\geq 3$ moderate RoB. | Paper was classified as high RoB            |  |
| All papers in between.                                                            | Paper was classified as having moderate RoB |  |
